# Supplementary material for: The MIDAS domain of AAA mechanoenzyme Mdn1 forms catch bonds with two different substrates
Source: eLife. 2022 Feb 11;11:e73534. doi: 10.7554/eLife.73534 (PMC8837202; doi:10.7554/eLife.73534)
Supplement: Figure 1—source data 1. [file elife-73534-fig1-data1.xlsx]

## Sheet: Fig1E
Elution volume (mL)	Rsa4-GFP alone	Rsa4-GFP plus MIDAS WT	Rsa4-GFP plus MIDAS Y4666R
	Normalized F528
6.56	0.000341284	0.000265443	2.77416e-05
6.81	0.000568807	0.000189602	2.77416e-05
7.06	0.000379204	0.000303364	2.77416e-05
7.31	0.000568807	0.000189602	2.77416e-05
7.56	0.000341284	0.000265443	2.77416e-05
7.81	0.000455045	0.000151682	2.77416e-05
8.06	0.000455045	0.000948011	0.000166449
8.31	0.000379204	0.00758409	0.000332899
8.56	0.000492966	0.030033	0.00219158
8.81	0.000303364	0.0463009	0.0054096
9.06	0.000492966	0.0427743	0.00660249
9.31	0.000606727	0.0350006	0.00651927
9.56	0.000568807	0.0295021	0.00601992
9.81	0.000644648	0.030526	0.00663023
10.06	0.000796329	0.0332562	0.00737925
10.31	0.000758409	0.0342042	0.00552057
10.56	0.0012893	0.0354177	0.0078786
10.81	0.00140306	0.0437602	0.00837795
11.06	0.00151682	0.0643889	0.00846118
11.31	0.00151682	0.095825	0.00857214
11.56	0.00633271	0.192143	0.00909923
11.81	0.00178226	0.320655	0.0101534
12.06	0.00208562	0.437261	0.0117069
12.31	0.00326116	0.530166	0.0170611
12.56	0.00511926	0.636836	0.0211946
12.81	0.00728073	0.586326	0.0221378
13.06	0.00712904	0.602101	0.0206397
13.31	0.00709112	0.660043	0.0184204
13.56	0.0087217	0.607903	0.0250506
13.81	0.0378067	0.578893	0.086304
14.06	0.226461	0.47484	0.392155
14.31	0.475105	0.392173	0.831858
14.56	1	0.373706	1
14.81	0.945281	0.331008	0.855134
15.06	0.777938	0.242122	0.648709
15.31	0.546206	0.174548	0.452631
15.56	0.375792	0.148914	0.283019
15.81	0.29286	0.120094	0.200682
16.06	0.223048	0.0860415	0.125808
16.31	0.164233	0.0637063	0.085444
16.56	0.109021	0.0510409	0.0549005
16.81	0.0795192	0.0900231	0.0348434
17.06	0.056236	0.0232452	0.0231919
17.31	0.0358727	0.0235486	0.0140372
17.56	0.0257101	0.0187327	0.00929342
17.81	0.0175572	0.0158887	0.00632508
18.06	0.0111865	0.0126654	0.0039393
18.31	0.00917675	0.0113003	0.00310705
18.56	0.00633271	0.0100489	0.00199739
18.81	0.00496758	0.00913883	0.00166449
19.06	0.00424709	0.00811497	0.00138708
19.31	0.00318532	0.00750825	0.000943213
19.56	0.00280611	0.00587767	0.000832247

## Sheet: Fig1G
	MIDAS-WT		MIDAS-Y4666R
	|ΔFNorm|		|ΔFNorm|
[MIDAS], uM	mean	SD	mean	SD
0.0195312	0.0985544	1.97439	0.896721	1.36617
0.0390625	0.451934	1.22553	0.762308	1.12403
0.078125	0.391192	1.75976	0.290359	0.860799
0.15625	0.0164118	1.40741	0.763291	0.745721
0.3125	0.671509	1.02942	0.524029	1.0925
0.625	1.60208	1.44631	1.34454	1.03823
1.25	2.07047	1.45729	1.49719	0.625697
2.5	4.55809	1.61651	2.8722	1.82031
5	5.85932	1.98035	2.71575	1.89297
10	7.66832	3.32571	3.72487	2.82661
20	11.4631	4.85569	4.41103	2.62718
40	12.5605	1.68316	8.25007	7.26162

## Sheet: Fig1 S1C
Rsa4-GFP		Ytm1-GFP
Bin edge kDa	Counts	Bin edge, kDa	Counts
0	0	0	0
5	0	5	0
10	0	10	0
15	0	15	0
20	0	20	0
25	0	25	0
30	1	30	1
35	0	35	2
40	9	40	2
45	10	45	10
50	12	50	15
55	16	55	41
60	30	60	83
65	78	65	183
70	149	70	302
75	186	75	395
80	273	80	394
85	246	85	293
90	203	90	165
95	147	95	65
100	64	100	26
105	28	105	10
110	16	110	14
115	9	115	6
120	5	120	2
125	3	125	3
130	5	130	2
135	3	135	7
140	3	140	1
145	2	145	2
150	2	150	0
155	3	155	4
160	5	160	0
165	1	165	0
170	1	170	0
175	0	175	0
180	0	180	0
185	0	185	0
190	0	190	0
195	0	195	0
200	0	200	1
205	0	205	1
210	0	210	0
215	0	215	0
220	0	220	0
225	0	225	0
230	0	230	0
235	0	235	0
240	0	240	1
245	0	245	0
250	0	250	0
