# Supplementary material for: The MIDAS domain of AAA mechanoenzyme Mdn1 forms catch bonds with two different substrates
Source: eLife. 2022 Feb 11;11:e73534. doi: 10.7554/eLife.73534 (PMC8837202; doi:10.7554/eLife.73534)
Supplement: Figure 2—source data 1. [file elife-73534-fig2-data1.xlsx]

## Sheet: Fig2D
20 nt + haipin		55 nt bridge		70 nt bridge
Extension, nm	Force pN	Extension, nm	Force pN	Extension, nm	Force pN
0.03	4.26	0.1	4.09	139.73	21.24
0	4.58	0.17	4.44	138.76	21.39
1.72	4.84	0.67	4.49	138.62	21.42
1.56	4.41	0.84	3.96	138.14	21.2
1.47	4.76	1.37	4.48	138.09	21.4
1.41	4.66	1.02	4.37	138.19	21.19
2.63	4.66	1.68	4.38	138.15	21.32
2.12	4.8	2.73	4.46	138.24	21.17
2.29	4.47	2.62	4.63	138.38	21.28
2.05	4.38	2.46	4.6	138.03	21.34
2.68	4.47	3.26	4.52	138.22	21.15
3.05	4.65	3.99	4.3	138.28	21.15
2.79	4.5	4.07	4.31	138.1	21.22
3.15	4.57	4.97	4.4	138.29	21.55
3.66	4.84	5.18	4.56	138.26	21.24
3.88	4.55	4.85	4.37	135.2	20.71
4.06	5.2	5.28	5.05	133.9	20.54
3.97	4.57	6.33	4.96	133.97	20.22
4.2	4.19	6.62	4.43	133.11	20.37
4.86	4.52	7.22	4.83	133.11	20.24
5.12	5.25	7.07	4.71	132.99	20.37
4.95	4.83	6.99	4.55	132.29	20.3
5.01	4.32	7.58	4.73	131.71	20.12
5.66	4.78	8.78	4.54	131.85	20.13
6.05	5.14	8.56	5.19	131.29	20.31
5.9	4.73	9.51	5.5	131.2	20.3
6.09	5.3	9	4.71	131.04	20.39
6.05	4.72	9.87	4.85	130.86	20.06
5.93	4.54	10.22	4.84	129.65	19.93
7.3	4.63	11.16	4.89	129.75	20.22
7.39	4.64	11.1	4.84	128.87	19.81
7.47	4.74	11.43	4.83	128.83	19.65
7.48	5.19	11.23	5.22	128.38	19.65
8.56	6.43	11.53	4.61	128.67	19.71
8.31	5.01	12.42	5.21	128.04	19.74
8.56	5.01	12.59	5.22	127.43	19.47
8.58	4.79	12.53	5.24	126.84	19.33
8.89	5.3	12.81	5.04	126.82	19.32
9.39	5.25	14.49	5.24	127.02	19.49
9.25	4.91	13.98	5.31	126.46	19.49
9.4	5.32	14.47	5.65	125.68	19.28
9.77	5.08	14.5	5.34	125.23	18.98
10.49	5.28	14.93	5.97	125.03	19.06
10.42	4.81	15.26	5.83	124.3	18.89
10.52	5.29	15.44	5.18	124.48	19.17
10.36	5.34	15.3	5.52	124.38	18.86
11.77	5.23	16.53	5.22	124.22	18.98
11.57	5.6	16.74	5.61	122.93	18.89
11.48	5.02	16.65	5.65	123.07	18.85
11.57	5.37	16.97	5.29	122.8	18.76
11.94	5.42	17.95	5.07	122.7	18.81
12.79	5.49	18.25	5.91	121.57	18.62
12.93	5.73	18.82	5.27	121.32	18.35
12.85	5.31	19.21	5.26	120.9	18.66
12.54	5.09	19.33	5.72	121.04	18.54
12.63	5.22	19.33	5.51	120.59	18.17
13.67	5.24	19.72	5.47	120.46	18.34
13.94	5.29	20.75	5.5	119.49	18.12
14.03	5.65	21.06	5.67	119.39	18.33
14.1	5.62	21.72	5.76	118.28	17.95
14.52	5.34	21.53	5.78	118.62	18.16
15.27	5.62	21.8	5.74	118.5	18.02
15.35	5.7	21.46	5.79	118.23	18.12
15.61	5.6	22.84	6.63	117.91	18.06
15.55	5.58	22.69	5.98	116.94	17.68
15.51	5.8	22.66	5.9	116.71	17.69
15.62	6.12	22.68	5.68	116.83	17.96
15.47	5.63	24.17	6.18	116.69	17.77
15.55	5.79	24.55	6.21	115.3	17.58
17.63	5.97	25.75	5.69	115.27	17.5
17.54	5.81	25	6.23	114.78	17.67
17.31	5.97	25.5	6.28	114.83	17.58
17.42	5.77	25.58	6.1	114.29	17.56
18.47	5.8	25.9	6.02	114.35	17.43
18.41	5.9	26.79	6.12	113.11	17.23
18.29	5.94	26.69	6.19	113.05	17.09
18.53	6.16	26.69	6.15	112.37	16.92
19.29	6.16	27.24	6.09	112.59	17.13
19.57	6.2	28.31	6.49	112.49	17
19.59	6.24	28.91	6.6	112.35	17.11
19.71	6.1	29.31	6.62	111.53	16.65
19.69	6.01	29.31	6.54	110.86	16.76
20.33	6.08	29.38	6.49	110.33	16.84
20.23	5.85	29.57	6.38	109.87	16.69
20.4	6.62	30.92	6.47	110.19	16.63
20.67	6.2	30.58	6.82	110.21	16.49
21.36	6.09	31.24	6.29	109.03	16.62
21.51	6.43	31.29	6.78	108.65	16.24
21.68	5.86	32.12	6.82	108.53	16.35
21.59	6.2	32.09	6.83	108.52	16.44
22.34	6.21	32.14	6.58	108.2	16.51
22.77	6.64	31.99	7.14	107.17	16.1
22.77	6.23	33.81	6.79	107.24	16.01
22.54	6.43	33.54	7.37	106.34	15.97
22.89	6.51	33.6	6.95	106.38	16.24
22.63	6.62	33.91	6.78	106.28	16.06
23.48	7.35	34.65	6.79	106.27	15.92
23.49	6.61	35.02	7.2	105.33	15.93
23.81	6.56	35.58	7.04	105.09	15.87
23.76	6.7	35.92	7.11	104.4	15.86
24.7	6.14	36.05	7.33	104.17	15.93
25.06	6.68	35.8	6.98	103.92	15.7
25.11	7.03	36.6	7	103.75	15.57
25.22	6.57	37.18	7.48	102.79	15.55
25.6	6.78	37.47	7.32	102.56	15.45
26.03	6.79	37.55	7.22	102.61	15.42
25.91	7.03	37.38	7.65	102.58	15.5
26.11	6.88	38.43	7.38	101.96	15.57
26.11	6.61	38.62	7.64	100.81	15.48
27.06	6.88	39.09	7.62	100.88	15.31
26.97	6.72	39.66	7.58	101.04	15.44
27.05	6.69	40.44	7.65	100.7	15.33
27.01	7.24	40.19	7.62	99.66	15.01
28.2	7.13	40.16	7.54	99.4	15.16
28.2	7.16	40.36	7.67	99.03	14.88
28.27	6.96	41.28	7.63	98.9	15.01
28.29	6.89	41.63	7.79	99.03	14.83
28.97	7.03	41.76	7.66	98.87	14.83
29.13	6.84	41.81	7.65	97.05	14.49
28.2	7.55	42.48	8	97.15	14.65
29.09	6.76	43.46	7.94	96.59	14.53
29.05	6.94	43.56	8.13	96.47	14.7
29.43	7.18	43.39	7.87	95.85	14.59
30.12	6.73	43.39	7.9	95.76	14.39
30.77	7.28	45.12	7.93	95.8	14.6
30.73	7.02	44.84	8.47	95.78	14.51
30.79	7.19	45.94	8.12	94.71	14.49
31.13	7.43	46.07	8.71	94.5	14.26
31.66	6.89	46.48	8.06	94.25	14.19
31.64	7.08	46.36	8.14	94.44	14.1
32.24	7.54	46.42	8.73	93.89	14.04
32.36	7.23	46.5	8.57	92.96	14.01
32.47	7.35	46.68	7.92	92.39	13.89
32.37	7.26	46.44	8.05	92.02	13.65
32.45	6.96	48.24	8.08	92.04	13.83
32.65	7.46	48.63	8.43	91.57	13.87
33.93	7.68	49.15	8.17	91.74	13.64
33.88	7.52	49.69	8.41	90.71	13.5
34.09	7.75	50.03	8.3	90.46	13.45
33.94	7.32	50.02	8.57	89.44	13.57
34.99	7.2	50.25	8.59	89.82	13.54
34.66	7.99	50.53	8.74	89.47	13.17
34.99	7.55	50.86	8.63	89.6	13.26
34.86	7.8	51.75	9.06	87.62	13.05
36.35	8.41	52.26	8.83	88.17	13.33
35.94	7.62	52.71	9.08	87.99	13.34
36.12	7.99	52.78	9.04	88.21	13.13
36.11	7.61	52.46	8.91	87.08	13.1
36.15	7.92	52.93	8.93	86.7	13.22
36.87	7.99	54.08	9.16	86.11	13.07
36.61	7.87	54.29	8.97	85.67	13.11
36.82	7.91	55.07	8.94	85.7	13.05
37.07	7.58	55.03	9.18	85.47	12.96
37.81	7.99	54.99	9.38	85.45	12.98
37.65	7.81	54.96	9.14	84.44	12.69
37.9	7.91	56.05	9.04	84.3	12.61
37.98	8.13	56.2	9.65	83.62	12.62
38.63	8.26	56.44	9.62	83.57	12.75
38.84	8.09	56.25	9.55	83.37	12.72
38.84	7.95	57.22	9.59	83.51	12.58
39.03	8.32	57.92	9.79	82.47	12.41
39.03	8.07	58.21	9.82	82.29	12.42
39.07	8.03	58.6	9.79	81.89	12.28
40.43	8.68	58.65	9.9	81.32	12.44
40.67	8.33	58.6	9.86	81.4	12.47
40.3	8.29	59.03	9.98	81.24	12.43
40.29	8.16	59.76	9.94	80.28	12.27
41.3	7.99	60	9.98	79.75	12.15
41.78	8.45	60.89	9.91	79.69	12.04
41.82	8.53	61.15	9.76	79.72	12.06
41.81	8.56	60.93	10.17	79.08	11.94
42.3	8.87	61.17	10	78.35	11.86
43.04	8.9	61.83	9.94	78.01	11.74
42.73	8.38	62.29	10.37	77.45	11.95
42.72	8.44	62.29	9.97	77.61	11.7
42.62	8.23	62.42	10.3	77.45	11.9
43.54	8.27	63.28	10.34	77.14	12.02
43.68	8.36	63.32	10.58	76.08	11.82
43.82	8.41	63.86	11.72	76.1	11.74
43.57	8	64.32	10.35	75.44	11.82
44.59	8.85	64.37	10.45	75.3	11.56
44.93	8.54	64.51	10.37	75.15	11.54
44.88	8.69	65.42	10.67	75.17	11.8
45.22	8.53	65.96	10.9	73.6	11.84
46.2	8.06	66.26	10.66	73.64	11.45
45.82	8.76	66.88	10.77	73.4	11.86
46.08	8.79	66.64	10.79	73.7	11.69
45.9	8.78	66.94	10.82	72.78	11.28
46.59	9.32	66.92	10.91	72.23	11.36
47.08	9.17	69.04	10.96	71.6	11.27
47.13	8.89	68.63	11.02	71.27	11.08
46.94	8.98	68.72	10.87	71.68	11.19
47.5	8.74	68.43	11.11	71.26	10.96
48.35	9.29	69.73	11.21	70.66	11.31
48.01	8.87	70	11.09	69.8	11.04
48.26	9.09	70.36	11.07	69.72	10.89
48.06	9.26	70.7	11.37	68.9	10.79
49.32	9.31	70.88	11.09	69.02	10.7
49.29	9.21	70.8	11.19	68.89	11.02
49.17	9.16	71.89	11.33	68.87	10.87
49.15	9.17	72.4	11.42	67.72	10.88
49.13	9.1	72.67	11.52	67.61	10.58
49.08	9.11	73.14	11.4	66.51	10.57
50.84	9.6	73.03	11.35	66.93	10.24
50.64	9.68	73.22	11.47	66.73	10.69
50.79	9.49	73.9	11.56	66.67	10.52
50.68	9.05	74.55	12	65.78	10.99
51.96	9.37	74.73	11.8	65.45	10.36
52.11	9.92	75.21	11.89	64.73	10.34
51.93	9.59	75.27	11.82	65.34	10.3
52	9.78	75.21	11.83	64.34	10.32
52.48	9.83	75.35	11.87	63.83	10.2
52.96	9.63	76.43	11.93	63.47	10.13
53.08	9.84	76.85	12.09	62.95	9.93
53.15	9.98	76.84	11.9	63.13	9.9
53.43	9.82	77.07	12.12	63	10.01
54.18	9.67	78.04	12.11	62.57	9.76
54.1	9.63	78.2	12.21	61.28	9.93
53.97	10.08	78.83	12.32	61.26	9.88
54.69	9.98	79.13	12.24	60.66	9.9
55.18	9.79	79.74	12.52	60.64	9.3
55.09	9.97	79.3	12.1	60.67	9.89
55.16	10.2	80.5	12.72	60.43	9.93
55.23	10.06	80.94	12.66	59.27	10.22
56.24	10.22	81.09	12.67	59.28	9.6
56.4	10.16	81.58	12.74	59.22	9.71
56.03	10.28	81.38	12.86	59.39	9.44
56.4	10.16	81.7	12.82	57.95	9.47
56.27	9.93	82.6	12.94	58.01	9.63
56.45	9.97	82.95	12.85	56.68	8.85
57.75	10.36	82.99	13.17	56.77	9.33
57.74	10.22	83.17	13.09	56.72	9.3
57.64	10.25	83.62	13.11	56.99	9.21
57.7	10.4	84.36	13.45	55.94	8.86
58.47	10.42	84.72	13.3	55.7	9.21
59.06	10.45	85.65	13.51	54.94	9.09
59.1	10.4	85.53	13.46	54.26	9.13
58.92	10.76	85.46	13.12	54.35	9.01
59.21	10.68	85.15	13.31	54.35	8.98
59.68	10.87	87	13.39	53.94	8.88
59.8	10.48	87.13	13.64	52.63	8.96
59.84	10.75	87.28	13.56	52.64	8.72
60.05	10.61	87.71	13.47	52.3	8.76
60.81	10.98	87.55	13.38	52.01	8.63
60.97	10.59	87.8	13.74	51.81	8.54
60.88	10.5	88.9	13.96	51.84	8.41
61.14	10.64	89.16	13.98	50.43	8.65
60.91	10.89	89.69	13.88	50.42	8.24
61.08	10.78	90.21	13.86	50.73	8.82
61.2	10.88	89.97	13.92	50.47	8.61
61.04	11.11	90.09	13.98	49.47	8.15
63.34	11.49	90.69	14.25	48.82	8.26
63.1	11.12	91.61	14.42	48.28	8.32
63.19	11.25	91.39	14.31	48.07	8.2
63.23	11.18	91.67	14.22	48.02	8.37
64.86	10.98	91.59	14.19	48.25	8.39
64.29	11.2	92.99	14.5	47.57	8.05
64.16	11.36	93.36	14.7	46.64	7.97
64.49	11.23	94.06	14.63	46.21	7.79
64.82	11.45	93.9	14.47	45.87	8.18
64.95	11.18	94.1	14.49	45.65	8.05
64.98	11.44	94.32	14.64	45.68	8.13
66.14	11.68	95.19	14.84	45.65	8.15
65.68	11.61	95.38	14.78	44.45	7.58
65.86	11.74	95.88	15.27	44.11	7.85
65.39	11.47	96.17	15.18	44.09	8.09
66.73	11.65	96.44	15.11	44.19	7.98
66.35	11.87	96.43	14.96	43.11	8
66.75	11.89	97.75	15.21	42.61	7.66
66.81	11.62	97.98	15.31	41.77	7.34
67.72	12.27	98.08	15.34	42.07	7.76
67.94	11.78	98.05	15.24	41.78	7.26
67.81	11.72	98.46	15.32	41.68	7.61
67.91	11.76	99.55	15.78	40.76	7.14
68.63	11.97	99.62	15.52	40.1	7.44
68.62	12.05	100.27	16.01	39.21	7.38
68.92	11.93	100.07	15.57	39.41	7.4
68.84	11.82	100.15	15.61	39.25	7.46
68.95	12.18	100.22	15.93	39.34	7.48
68.89	12.1	101.79	15.79	38.09	7.24
68.26	11.59	101.61	16.04	37.73	7.51
68.82	11.96	102.59	15.9	37.49	7.22
68.96	12	102.74	15.93	37.73	7.44
68.57	12.09	102.6	16.18	36.88	7.29
69.51	12.07	102.87	16.13	36.39	6.95
71.4	12.11	103.76	16.18	35.58	6.89
71.34	12.48	103.95	16.28	35.22	7.08
71.43	12.38	105.26	16.19	35.32	6.78
71.83	12.59	105.27	16.61	35.19	7.1
72.24	12.64	104.96	16.59	35.31	7.17
72.35	12.53	104.91	16.35	33.38	6.99
72.17	12.54	106.04	16.59	33.64	6.85
72.35	12.83	106.4	16.64	33.91	6.97
72.36	12.69	106.54	16.67	33.74	6.79
72.29	12.51	106.87	16.87	32.7	6.54
74.27	12.82	107.16	16.9	32.13	7.02
73.98	12.88	107.76	16.99	31.17	6.68
74.25	12.76	108.27	17.27	31.23	6.8
74.3	13.2	108.83	16.99	31.26	6.44
75.39	12.83	108.73	17.09	31.07	6.54
75.46	12.99	109	17.17	30.33	6.63
75.38	12.76	108.6	16.84	29.63	6.07
75.34	12.96	109.88	17.33	29.5	6.13
75.89	12.78	110.37	17.38	28.66	6.35
76.27	13.03	111.35	17.21	28.99	6.37
76.46	13.1	111.02	17.56	28.84	6.34
76.21	12.93	111.52	17.52	27.97	6.33
76.53	13.34	111.39	17.68	27.34	6.31
77.23	13.36	112.41	17.67	27.25	5.91
77.09	13.4	112.7	17.76	26.2	6.23
77.42	13.24	113.41	17.67	26.48	6.14
77.16	13.28	113.58	17.73	26.49	6
77.21	13.31	113.59	17.77	26.04	6.28
77.49	13.08	113.52	17.86	25.24	5.96
78.8	13.25	113.99	18.07	25.19	6.2
79.14	13.12	115.07	17.93	24.48	5.97
78.9	13.33	114.89	18.03	24.36	5.82
79	13.4	114.81	17.96	24.57	5.95
79.39	12.73	115.15	18.26	24.28	5.73
79.07	13.12	116.37	18.32	22.84	6.19
79.91	13.61	116.32	18.53	22.57	5.98
80.71	13.41	117.6	18.45	22.46	5.57
81.18	13.99	116.99	18.58	22.46	5.82
81.28	13.6	117.43	18.51	21.75	5.96
81.06	13.82	117.62	18.5	21.3	5.7
80.93	13.9	118.69	18.52	20.4	5.42
82.01	13.97	118.88	18.54	19.97	5.9
82.34	14.12	119.85	18.61	20.09	5.88
82.12	14	119.55	18.82	20.28	5.79
82.43	14.09	119.8	18.76	20	6.11
82.72	13.99	119.49	18.73	18.54	6
83.28	14.11	120.72	18.88	18.64	5.75
83.26	14.04	121.44	19.03	17.81	5.75
83.97	14.38	121.24	19.06	17.49	5.71
83.84	13.99	121.2	19.1	17.84	5.53
83.74	14.15	122.17	19.24	17.51	5.93
83.94	14.34	122.9	19.36	16.28	5.52
83.91	14.26	123.02	19.63	16.29	5.28
83.68	14.2	123.59	19.45	16.28	5.25
85.08	14.52	123.79	19.69	16.03	5.83
85.49	14.28	123.96	19.58	14.71	5.59
85.8	14.63	123.8	19.62	14.27	5.54
86.07	14.6	125.17	19.75	13.67	5.32
86.52	14.44	125.13	19.84	13.68	5.5
86.3	14.53	126.15	20.03	13.64	5.15
86.96	14.89	125.97	20	13.52	5.31
87.16	14.58	126.05	19.81	13.07	5.58
87.4	14.81	126.03	20.1	12.15	5.36
87.65	14.56	127.42	20.01	11.76	5.24
87.71	14.69	127.49	20.04	10.91	4.87
87.89	14.67	128.34	20.02	11.06	5.25
87.91	14.66	128.11	20.34	11.15	5.16
87.87	14.81	128.34	20.57	10.98	5.07
88.48	15.08	128.15	20.54	9.79	5.67
89.61	15.1	129	20.44	9.11	4.9
89.57	15.11	129.84	20.66	8.83	5.09
89.54	14.99	129.9	20.49	8.34	4.64
89.38	15.12	130.03	20.65	8.5	4.73
90.38	15.31	130.91	20.75	8.51	5.33
90.43	15.42	131.47	20.92	7.44	5.24
90.25	15.32	131.85	20.78	7.21	5.11
90.45	15.26	132.44	20.68	5.99	4.99
91.36	15.49	132.43	20.68	5.94	5.01
91.73	15.56	132.63	20.99	5.86	4.78
91.52	15.38	132.64	20.95	6.1	5.13
91.55	15.38	131.33	20.96	5.24	4.97
91.4	15.24	131.62	20.8	4.56	4.61
91.27	15.62	130.94	20.82	4.54	4.37
91.62	15.51	130.71	20.74	4.47	4.41
91.51	15.25	130.75	20.81	3.87	4.46
92.41	15.48	130.99	20.8	2.88	4.93
92.69	15.71	129.78	20.61	2.73	4.38
92.71	15.54	129.27	20.53	2.33	4.33
93.07	15.76	129.11	20.35	2.28	4.25
92.92	15.92	129.46	20.59	2.15	4.33
92.89	15.36	128.57	20.47	1.79	4.6
93.63	15.64	128.26	20.39	1.15	4.38
95.15	15.93	127.64	20.54	0.81	4.12
95.18	15.78	127.26	20.41	0.75	4.21
95.37	15.82	127.45	20.37	0.2	4.33
95.33	16.07	127.42	20.16	0.01	4.1
96.3	16.25	126.83	20.11	0.36	4.23
96.25	15.85	125.72	20.05	1.1	4.27
96.33	16.25	125.67	20.2	1.96	4.2
96.46	16.19	125.09	19.89	2	4.43
97.57	16.24	125.05	19.92	2.76	4.36
97.34	16.28	125.24	19.92	2.59	4.13
97.44	16.4	125.02	20.03	2.51	4.4
97.44	16.38	123.71	19.72	2.8	4.27
98.49	16.08	123.72	19.75	4.1	4.23
98.5	16.63	123.51	19.91	4.07	4.53
98.83	16.51	123.83	19.66	4.35	4.34
98.74	16.52	122.87	19.51	4.02	4.35
99.15	16.54	122.22	19.49	5.5	4.36
99.76	16.91	121.29	19.18	5.46	4.51
99.98	16.88	121.62	19.17	6.76	4.42
100.44	16.87	121.87	19.37	6.69	4.49
100.16	16.4	121.68	19.35	6.42	5.1
100.87	16.44	120.74	19.08	6.8	4.39
100.97	16.79	119.96	19.02	7.8	4.37
100.78	16.89	120.18	18.99	8.42	4.74
100.55	16.82	119.55	18.89	8.95	4.43
102.04	17.17	119.23	19	9	4.69
101.79	17.18	119.33	18.68	9.25	4.77
102.17	17.13	119.39	18.95	9.39	4.91
102.1	17.03	118.29	18.54	9.42	4.95
102.73	17.46	118.08	18.73	10.6	4.69
102.95	17.11	117.25	18.56	10.72	4.81
103.14	17.03	117.33	18.54	11.37	4.95
102.79	17.58	117.37	18.47	11.81	4.89
102.78	17.26	117.43	18.46	11.86	4.95
102.88	17.49	115.57	18.26	11.74	5.01
104.27	17.85	115.76	18.21	12.87	4.55
104.39	17.73	116.01	18.15	13.26	5.69
104.61	17.81	115.84	18.2	13.29	4.99
104.62	17.88	114.8	17.82	13.49	5.39
105.29	17.52	114.4	17.82	14.36	5.24
105.29	17.57	114.25	17.83	14.68	5.51
105.27	17.86	113.55	18.02	14.85	5.37
105.53	17.87	113.75	17.74	15.34	5.35
106.49	17.79	113.78	17.98	15.12	5.45
106.61	17.82	112.97	17.98	15.61	5.34
106.61	18.01	112.66	17.88	16.23	5.25
106.49	18.11	112.17	18.02	17.01	5.37
107.11	17.98	112.04	17.61	17.33	4.78
107.83	18.14	111.84	17.74	17.88	5.41
107.8	17.81	111.48	17.55	17.94	5.55
107.65	17.98	111.45	17.66	18.05	5.26
107.51	18.14	110.25	17.43	18.49	5.72
108.66	18.01	110.01	17.4	19.5	5.64
108.74	18.36	110.19	17.31	19.58	5.64
108.93	18.34	110.23	17.39	19.57	5.21
108.99	18.48	108.93	17.16	19.45	5.66
109.33	18.41	108.83	17.29	21.03	5.62
109.07	18.12	107.99	17.39	21.41	6.01
109.04	17.98	108.15	17.19	22.22	5.67
108.65	18.09	106.81	17.02	22.35	5.67
110.92	18.23	107.87	17.27	22.36	6
110.96	18.41	106.78	17.02	22.25	5.95
111.26	18.45	106.63	16.9	23.69	5.95
110.98	18.7	106.24	16.87	23.88	5.87
111.09	18.7	106.09	16.78	24.44	5.88
112.04	18.85	105.53	16.99	24.78	5.79
111.81	18.86	105.89	16.78	24.66	6.02
112.03	18.71	105.26	16.67	24.64	5.89
112.75	19.21	104.29	16.41	25.31	6.01
112.96	18.97	104.05	16.44	25.72	5.89
113.4	19.38	103.98	16.52	26.04	6.02
113.15	19.17	103.94	16.07	26.62	6.13
112.94	19.01	103.51	16.23	26.95	6.13
114.01	19.05	103.28	16.45	26.88	6.54
114.44	19.05	102.13	16.12	27.25	6.24
115.04	19.28	102.36	16.15	28.47	6.67
115.24	19.14	102.36	16.03	28.34	6.47
114.92	19.37	102.24	16.04	28.55	6.18
114.63	19.25	101.07	15.95	28.52	6.12
114.84	19.17	100.83	15.94	29.59	6.85
114.75	19.19	99.79	16.05	29.77	6.68
114.86	19.3	99.88	15.55	30.97	6.8
115.21	18.92	100.19	16.01	30.97	6.89
116.6	19.27	99.94	15.89	31.01	6.32
116.56	19.47	98.62	15.7	30.88	6.63
116.61	19.37	98.43	15.59	32.11	6.83
116.91	19.45	97.93	15.84	32.4	6.8
117.94	19.64	97.66	15.39	33.02	6.86
117.99	19.8	97.73	15.53	33.22	6.73
117.76	19.8	97.92	15.55	33.22	6.59
117.99	19.49	97.38	15.67	33.57	6.87
119.25	19.99	96.47	15.22	34.17	6.7
118.05	19.93	96.39	15.3	34.99	6.52
117.89	19.09	95.52	14.97	35.18	6.58
117.91	19.54	95.58	15.02	35.11	6.59
119.23	19.66	95.5	15.11	35.36	6.55
119.91	19.65	95.77	15.08	36.43	6.79
120.11	20.14	94.09	14.87	36.88	6.9
120.56	19.99	94.07	15.05	37.37	7.21
120.54	19.93	94.23	15.08	37.42	7.23
120.6	19.9	94.02	14.91	37.33	6.79
120.54	19.9	93.12	14.71	37.31	7.09
120.75	19.95	92.68	14.73	38.54	7.05
120.78	20.13	92.23	14.29	38.89	7.33
120.56	20.02	91.77	14.49	40.07	7.47
120.86	19.98	92.15	14.58	39.61	7.42
122.91	20.15	92.06	14.32	39.61	7.56
122.76	20.29	91.25	14.68	39.79	7.45
122.87	20.37	90.69	14.29	40.82	7.33
123.11	20.46	90.41	14.36	41.41	7.67
123.44	20.21	89.99	14.25	41.71	7.45
123.87	20.07	89.85	14.48	42.27	7.65
124.35	20.54	90.07	14.35	42.34	7.61
124.3	20.34	89.56	14.54	42.33	7.72
124.87	20.56	88.57	14.14	43.22	7.71
124.83	20.45	88.59	14.05	44.23	7.89
124.71	21.13	88.77	13.99	43.97	7.89
124.74	20.38	88.98	14.01	44.12	7.8
125.07	20.54	87.41	13.91	44.19	7.93
124.88	20.16	87.24	13.86	45.33	7.83
125.74	20.36	86.37	13.88	45.69	7.94
126.63	20.35	86.56	14.04	46.37	7.64
126.47	20.49	86.5	13.11	46.54	7.84
126.24	20.4	86.46	13.71	46.46	7.38
126.66	20.55	85.36	13.41	46.9	7.98
127.94	20.65	84.74	13.5	47.84	8.19
127.97	20.7	84.16	12.87	47.9	8.25
127.93	20.69	83.38	13.05	48.99	8.05
128.01	20.76	83.85	13.22	48.47	8.09
128.18	21.02	84.05	13.26	48.65	8.33
127.95	20.67	83.32	13.31	48.69	8.28
128.17	20.24	82.8	13.27	49.71	8.57
128.31	20.35	82.54	13.31	50.4	9.17
128.32	20.72	82.65	13.5	50.14	8.61
128.33	20.76	82.71	13.42	50.26	8.43
128.75	21.23	82.02	13.08	50.73	8.58
128.31	20.75	81.82	12.96	51.88	8.56
131.09	20.37	80.25	12.95	51.95	8.49
130.9	20.78	80.62	12.88	52.44	8.56
131.02	20.66	80.53	13	52.46	8.56
131.06	20.83	80.25	13.03	52.48	8.58
131.8	21.33	79.04	12.95	52.93	8.54
132.35	20.99	78.8	12.79	54.07	8.71
132.13	20.59	79.03	12.74	54.07	8.86
132.31	21.06	78.98	12.73	55.15	9.22
132.6	20.96	77.61	12.47	54.98	9.13
132.64	20.82	77.63	12.52	55.45	9.12
133.2	20.82	76.82	11.86	55.31	8.77
133.62	21.22	76.87	12.39	56.44	9.16
133.81	21.13	77	12.47	56.98	9.2
133.68	21.23	76.76	12.01	57.36	9.08
133.96	21.2	75.52	12.2	57.43	9.2
134.58	20.91	75.26	11.99	57.45	9.24
134.64	20.88	75.18	12.12	57.2	9.27
134.75	21.13	74.58	11.96	58.47	9.4
134.53	21.3	74.45	12.07	59.29	9.32
135.41	20.53	74.66	11.95	59.12	9.74
135.89	21.14	74	11.92	59.1	9.26
135.66	21.22	73.07	12.03	59.69	9.59
135.75	20.8	73	11.92	60.43	9.52
136.7	21.21	73.07	11.56	60.58	9.34
136.71	21.19	73.07	11.67	61.28	9.81
136.71	20.89	71.67	11.39	61.49	9.7
137.01	21.82	71.22	11.4	61.65	9.92
136.9	20.32	70.93	11.43	61.55	9.73
136.82	21.19	70.88	11.8	63.09	9.71
136.78	21.31	69.99	11.62	63.03	9.88
136.99	21.19	70.1	11.33	63.85	10.03
137.68	20.65	70.1	11.53	64.14	9.9
138.84	21.08	70.05	11.44	64.02	9.88
138.87	21.3	68.79	11.11	63.81	9.98
138.98	21.24	68.54	11.14	65.76	10.56
139.27	21.46	68.15	11.28	65.46	10.38
139.88	21.23	68.34	11.31	65.59	10.33
140.05	20.72	67.4	11.36	65.57	10.32
140.84	21.02	66.86	10.93	66.54	10.28
140.65	21.28	66.58	11.11	66.87	10.26
140.9	20.99	66.63	11.04	67.48	10.46
141.33	21.31	66.25	10.73	67.43	10.28
141.47	21.31	66.24	10.95	67.89	10.7
141.72	21.49	66.14	10.83	67.62	10.57
141.34	21.93	64.9	10.52	68.08	10.43
141.85	21.47	65.08	10.68	69.48	10.85
141.87	21.05	64.97	10.44	69.37	10.76
141.98	21.55	64.69	10.48	70.15	10.86
143.71	21.89	63.66	10.49	70.13	10.8
143.57	22.37	63.52	10.37	70.28	11
143.67	21.2	62.84	10.42	69.81	10.66
143.33	21.79	63.07	10.19	71.12	10.83
144.4	22.35	62.72	10.49	71.26	10.62
144.48	21.73	62.92	10.48	72.43	11.63
144.38	21.83	61.88	10.53	72.24	11.09
144.54	21.52	61.51	10.24	72.17	11.02
145.07	21.06	60.57	9.58	72.01	11.13
145.67	21.1	60.87	10.34	73.37	11.05
145.71	21.6	60.96	10.04	73.77	11.28
145.83	21.16	61.03	10.06	73.8	11.06
145.75	21.19	59.17	10.27	73.75	11.45
146.54	21.84	59.56	10.04	74.38	11.57
146.69	21.45	59.67	10.06	75.3	11.42
147.11	20.97	59.41	9.95	75.6	11.53
147.12	21.61	58.78	9.88	75.82	11.4
147.18	21.35	57.89	9.96	75.95	11.83
147.02	21.47	57.48	9.85	75.68	11.52
147.14	21.58	57.18	9.74	76.19	11.51
147.23	21.28	56.68	9.86	77.54	11.6
147.31	21.44	56.27	9.7	77.86	11.83
147.6	21.82	56.1	9.78	78.33	12.02
147.7	20.66	56.13	9.43	78.87	11.81
147.49	21.31	56.11	9.52	78.6	11.91
149.59	21.79	54.92	9.12	78.73	11.84
149.75	22.03	54.9	9.41	80	12.04
150.3	21.6	54.6	9.75	80.1	12.04
150.47	21.58	54.87	9.42	81.35	11.99
150.31	21.61	53.71	9.2	81	12.26
150.27	21.59	53.29	9.44	81.14	11.99
150.86	21.75	52.61	9.17	81.11	12.24
151.4	21.42	52.62	9.26	81.73	12.45
151.53	21.8	52.41	8.94	82.26	12.46
151.42	22.06	52.43	9.07	82.47	12.45
152	22.11	51.99	9.25	82.56	12.36
152.38	22.13	51.16	9.1	82.85	12.53
152.55	21.77	49.8	8.64	83.99	12.64
153.1	22.02	50.35	9.14	84.46	12.48
152.99	21.97	50.08	8.59	84.85	12.64
153.19	21.74	50.19	9	84.67	12.69
153.17	21.87	49.36	8.68	85.08	12.6
153.13	21.88	49.15	8.82	84.93	12.43
153.04	22.05	48.93	8.92	86.27	12.9
154.53	22.5	49.02	9	86.75	13.01
154.68	22.01	48.35	8.64	86.97	12.97
154.93	22.15	47.77	8.66	87.26	13.07
154.94	21.72	47.22	8.45	87.32	13.04
155.15	22.25	46.98	8.61	87.36	12.88
155.01	21.67	46.86	8.44	88.72	13.22
155.27	22.02	47.15	8.38	88.63	13.22
155.46	21.96	46.85	8.75	88.88	13.24
156.54	22.86	45.51	8.27	88.51	13.29
157.23	22.5	45.46	8.39	89.93	13.23
157.32	21.98	45.38	8.3	90.14	13.35
157.01	21.89	45.17	8.65	90.53	13.47
157.4	22.33	43.85	8.29	90.99	13.35
156.97	22.68	43.81	8.2	90.98	13.45
158.28	21.09	43.3	8.08	90.92	13.53
158.92	21.64	43.19	8.36	91.43	13.45
159.04	22.41	43.17	8.21	92.25	13.51
159.37	23.45	43.23	8.32	92.71	13.6
159.4	22.35	42.18	8.09	93.22	13.72
159.28	21.43	41.55	8.05	93.44	13.73
159.31	22.36	40.44	7.17	93.48	13.55
160.28	22.86	41.03	8.04	93.35	13.5
160.11	22.02	40.61	8.27	94.59	13.83
160.49	22.77	40.83	7.85	94.76	13.88
160.31	21.85	40.38	8.11	94.67	14.1
161.23	21.3	39.57	7.8	94.88	13.97
161.57	21.91	39.72	7.91	96.22	14
161.79	21.24	39.56	7.85	96.46	14.09
161.91	22.63	39.3	7.66	97.41	14.32
161.8	21.38	37.83	7.91	97.62	14.43
161.85	22.72	37.84	7.62	97.82	14
161.74	21.61	37.39	7.72	97.65	14.35
162.08	21.04	37.26	7.61	98.63	14.4
162.08	21.76	37.16	7.61	99.27	14.4
161.98	20.94	37.25	7.54	99.63	14.65
163	21.29	35.92	7.51	99.64	14.56
163.92	21.67	35.99	7.58	100.01	14.83
164.3	21.58	35.76	7.01	99.86	14.75
164.98	21.5	36.13	7.28	100.19	14.74
164.85	22.11	35.03	7.25	101.38	14.91
165.05	22.47	34.86	7	101.25	15.08
165.64	21.82	33.42	6.42	101.39	14.95
166.09	21.53	34.04	6.92	101.92	15.1
166.12	21.56	33.78	7.15	103.12	14.92
166	21.84	33.58	7.25	103.61	14.95
166.37	21.54	32.82	6.77	103.86	15.24
166.28	21.76	32.29	7.12	103.82	15.21
166.17	21.42	31.8	7.16	104.18	15.07
167.07	21.8	31.37	6.62	104.17	15.26
167.51	22.27	31.69	6.6	105.2	15.02
167.74	21.96	31.26	6.85	105.57	15.14
168	21.84	31.47	7.2	106.46	15.44
167.96	21.53	30.34	6.8	106.29	15.34
167.81	21.86	30.19	6.89	106.71	15.72
167.97	22.14	29.59	6.77	106.4	15.49
168.01	22.08	29.44	6.62	107.72	15.79
168.05	22.25	30.08	6.46	107.91	15.99
167.86	21.68	29.28	6.66	107.6	15.46
169.39	22.2	28.09	6.77	108.05	16.03
170.56	22.15	27.82	6.39	108.85	15.88
170.29	21.93	27.44	6.12	109.4	16.03
170.95	22.25	26.85	6.44	110.04	16.22
171.22	22.8	26.9	6.53	110.18	16.14
171.06	22.22	27.1	6.5	110.27	16.24
171.55	22.73	26.23	6.14	110.43	16.38
172.35	22.62	25.79	6.86	110.59	16.61
172.62	22.66	25.72	6.49	111.78	16.39
172.73	22.57	25.62	6.5	111.81	16.31
172.96	22.73	24.91	6.43	111.7	16.6
172.8	22.56	24.57	6.24	112.06	16.42
172.92	22.77	24.17	6.17	113.32	16.57
173.14	22.75	23.52	6.21	113.34	16.71
173.07	23.04	23.56	6.29	114.32	16.95
174.76	23.13	23.21	6.58	114.46	16.92
174.56	22.95	23.28	6.18	114.43	16.9
174.56	22.86	22.35	6.11	114.51	17.06
174.66	23.03	21.96	6.12	115.65	16.97
175.59	23.06	21.17	6.07	116	17.23
175.54	23.21	21.09	5.88	116.88	17.48
175.57	22.98	21.11	5.88	116.87	17.45
175.63	23.15	20.94	5.88	117.13	17.53
176.31	23.29	19.64	6.2	116.84	17.38
176.67	23.17	19.75	5.77	117.74	17.41
176.8	23.52	20.16	6.32	118.42	17.68
176.84	23.44	19.66	5.72	118.92	17.71
177.09	23.61	18.67	5.85	119.24	17.58
176.99	23.41	18.19	6.04	119.37	17.78
177.09	23.68	17.68	5.71	119.64	17.63
176.95	23.28	17.63	5.59	119.91	17.73
177.08	23.56	17.3	5.95	120.7	17.89
177.06	23.17	16.73	5.6	120.95	17.97
177.62	23.54	16.79	5.29	121.87	18.07
179.45	23.81	16.69	5.47	121.77	18.07
179.16	23.42	16.65	5.34	121.59	18.1
179.49	23.71	15.49	5.44	121.68	18.1
179.33	23.7	15.39	5.68	123.17	18.59
180.7	23.57	15.48	5.13	123.25	18.31
180.59	23.71	15.2	5.81	123.52	18.21
180.61	23.89	14.21	5.5	123.44	18.44
180.68	23.94	13.92	5.27	124.56	18.54
180.77	24.15	12.84	5.33	124.91	18.46
180.95	23.86	12.74	5.29	125.68	18.37
180.77	24.01	12.11	5.41	126.05	18.71
180.81	24.05	12.75	5.1	126.05	18.77
182.97	23.92	11.91	4.78	126.2	18.65
182.61	24.22	11.71	5.24	126.77	18.77
182.76	24.16	11.2	5.17	127.31	18.81
182.72	24.67	10.81	5.05	127.85	19.17
183.56	23.97	10.47	5.06	127.9	18.95
183.72	24.25	10.61	5.16	128.23	18.88
183.7	24.51	10.36	5.17	128.17	19.12
183.84	23.41	9.46	4.64	128.94	19.37
183.95	24.41	9.2	5.1	129.79	19.31
183.85	24.26	9.55	4.91	129.83	19.29
184.19	23.62	9.12	5.4	129.74	19.46
185.14	24.39	7.77	4.97	129.8	19.49
185.23	24.33	8.08	4.94	131.01	19.76
185.47	22.97	7	4.66	131.19	19.85
185.46	24.32	7.17	5.32	132.25	19.88
186.18	24.53	7.11	4.83	132.47	19.65
186.42	24.16	7.17	4.79	132.3	19.76
187.28	24.77	5.82	4.8	132.3	19.81
187.24	23.71	5.72	4.97	133.59	19.96
187.35	22.65	5.35	4.88	134.15	19.69
187.33	23.92	5.25	4.72	134.26	19.91
187.51	24.4	4.57	6.12	134.53	20.06
187.82	24.27	3.95	4.67	134.91	20.05
188.75	22.61	3.34	4.32	134.8	20.18
188.63	23.52	3.13	4.62	135.46	20.29
189.46	23.89	2.95	4.65	136.07	20.15
189.45	23.32	2.83	4.28	136.55	20.28
189.94	23.5	2.63	4.64	136.88	20.59
190.08	23.9	2.39	4.48	136.95	20.47
190.04	23.5	2.29	4.8	137.13	20.44
189.99	23.47	1.16	4.43	137.56	20.75
190.24	23.37	1.07	4.35	138.7	20.71
190.91	24.04	1.24	4.35	138.68	20.82
190.93	23.75	0.96	4.83	138.8	20.79
191	23.42			138.56	20.85
191.4	24.04			139.83	21.01
192.47	23.72			140.14	21.17
192.2	23.72			140.74	21.16
192.49	23.65			141	21.26
192.81	24.8			140.9	21.31
193.21	23.57			140.88	21.08
193.16	23.37			139.8	21.15
193.26	23.63			139.68	21.21
193.32	23.52			138.8	20.89
194.06	23.63			139	21.08
194.29	24.09			138.91	21
194.57	23.46			138.96	21.13
194.52	23.72			138.29	20.15
195.41	23.57			137.42	20.79
195.62	23.84			137.7	20.86
195.61	24.19			137.63	20.85
195.65	19.76			137.03	20.75
195.91	19.29			136.46	20.58
196.53	20.21			136.29	20.5
196.78	19.76			135.49	20.34
196.81	19.59			135.62	20.32
196.94	19.69			135.34	20.41
197.91	19.45			135.13	20.23
197.89	19.77			134.08	20.27
198.18	19.9			134.11	20.2
198.17	20.1			133.6	19.99
199.16	19.72			133.53	20.02
199.16	19.88			133.39	20.15
199.51	19.54			133.37	20.16
199.06	19.85			131.92	19.98
199.09	19.93			132.25	19.8
199.13	19.64			131.22	19.71
200.54	20.02			131.93	19.85
200.79	20.07			131.11	19.81
200.59	20			130.51	19.66
200.46	19.82			129.21	19.93
200.96	20.09			129.62	19.53
201.71	19.93			130	19.65
202.07	20.03			129.7	19.6
201.75	20.3			129	19.65
202.06	20.07			128.42	19.3
202.91	20.13			128.35	19.15
203.09	20.12			127.62	19.41
202.76	20.2
202.93	20.21
203.84	19.99
203.88	20.03
203.66	20.15
204.12	20.09
204.83	20.19
204.81	20.26
205.17	20.59
205.53	20.45
205.32	20.61
205.45	20.65
205.55	20.58
205.69	20.47
205.65	19.93
205.48	20.24
205.88	20.16
206.01	20.23
207.27	20.26
208.38	20.69
208.51	20.23
208.46	20.76
208.93	20.55
209.52	20.51
209.52	20.75
209.99	21.24
209.94	20.17
209.95	20.66
210.14	21.14
210.5	20.82
210.9	20.83
211.61	20.75
211.52	20.98
211.62	20.97
211.71	21.05
211.84	20.21
212.09	21.03
212.47	21.2
212.59	21.1
213.17	21.23
213.57	21.16
213.68	20.75
213.73	20.69
213.89	21
214.62	21.44
214.82	21.05
214.92	21.2
214.76	21.18
216.12	21.35
216.09	21.18
216.06	21.48
216.4	21.11
217.31	21.15
216.76	21.33
217.24	21.59
217.41	21.46
218.49	21.57
218.56	21.52
217.9	21.62
218.33	21.56
218.65	21.76
218.36	21.68
219.25	22.19
219.89	22.26
220.19	22.09
220.38	22.15
220.62	21.57
221.18	22.16
221.15	21.91
221.13	21.74
221.4	21.75
222.11	21.92
222.26	22.43
221.86	22.19
222.38	22
223.51	22.25
223.34	21.93
223.87	21.97
224.05	21.86
223.95	22.27
224.14	22.12
224.77	22.31
225.2	22.21
225.22	22.48
225.39	22.42
225.68	22.32
226.33	22.44
226.34	22.18
226.15	22.36
226.59	22.31
227.4	22.33
227.66	22.8
227.72	22.51
227.94	22.9
228.82	22.52
228.81	22.72
228.92	22.55
228.8	22.2
230.54	22.55
230.06	22.55
230.34	22.43
230.14	22.93
230.8	23.21
231.02	22.85
230.86	22.68
231.25	22.75
231.54	22.98
232.12	22.58
232.17	23.03
232.31	22.6
232.37	22.26
232.08	23.02
232.23	23.15
232.26	22.58
232.69	23.33
234.11	22.88
234.43	22.93
234.38	22.58
234.66	23.44
235.45	23.47
235.45	23.23
235.39	23.1
235.45	22.69
236.41	23.03
236.73	23.36
236.62	22.95
236.32	22.71
237.3	22.78
237.52	23.31
236.97	24.42
237.41	23.36
237.74	23.35
237.65	23.08
238.31	23.59
239.35	23.68
239.12	22.85
239.34	23.41
239.83	23.25
240.58	23.75
240.74	23.75
241.15	23.52
241.13	23.47
241.54	23.29
241.39	23.04
242.05	24.03
242.26	23.1
242.29	23.72
242.67	23.19
243.26	23.11
243.71	22.95
244.06	23.49
243.67	23.12
244.47	22.44
244.8	23.57
244.83	23.26
245.39	23.69
245.13	23.66
245.35	23.21
245.56	23.31
245.26	23.46
245.74	23.49
246.96	23.5
246.84	23.1
247.34	22.95
247.27	23.58
247.63	23.92
247.55	23.62
248.49	23.58
248.68	23.93
249.08	20.94
249.24	21.16
249.23	20.72
249.05	20.95
250.55	24.68
250.57	24.01
250.46	21.86
250.43	20.88
250.81	21.4
251.47	23.65
251.61	22.4
251.66	23.86
252.52	21.88
253	22.19
252.79	23.38
252.9	23.48
253.28	22.66
253.98	21.69
253.96	20.67
254.57	21.4
254.23	21.21
254.29	20.95
254.01	21.89
255.13	22.16
255.61	21.77
255.77	21.48
255.75	21.52
256.17	21.48
256.49	21.34
257.41	22.42
257.27	21.57
257.54	21.14
257.34	21.61
257.83	21.5
258.51	21.38
258.68	21.7
258.38	21.18
258.63	21.43
259.66	21.47
259.65	21.77
260.58	21.21
260.23	21.46
260.2	21.85
260.45	22.13
261.25	22.03
261.46	22.56
261.65	21.91
261.59	21.3
261.56	21.37
261.59	21.49
262.37	21.56
262.58	21.92
262.62	21.36
263.02	21.41
263.67	21.91
264.2	21.88
264.33	21.4
264.49	21.87
264.86	21.54
265.49	21.83
265.28	21.58
265.41	21.9
265.34	21.51
266.12	22.11
266.66	21.76
266.8	21.81
266.77	22.14
267.35	21.99
267.61	22.06
267.73	21.98
267.77	21.95
267.93	22.24
267.81	22.35
268.89	22.1
269.31	22.16
269.51	22.3
269.42	22.5
269.45	22.51
269.39	22.25
270.37	22.4
271.31	22.35
271.24	22.47
271.19	22.57
271.56	22.46
271.98	22.41
272.06	22.86
272.34	22.76
272.15	22.78
273.25	22.65
273.5	22.87
273.48	23.05
273.49	22.96
273.75	23.01
274.02	22.92
275.62	23.01
275.51	22.89
275.62	22.63
275.4	22.79
276.42	23.36
276.17	22.79
276.46	23.56
276.25	23.04
276.3	23.06
277.29	23.21
277.65	23.2
278	23.5
278.1	23.37
278.19	23.32
278.44	23.52
279.45	23.52
278.93	23.09
279.45	23.3
279.23	23.59
280.3	23.61
280.48	23.36
280.9	23.6
280.57	23.59
280.29	23.42
280.16	23.76
281.28	23.47
281.85	23.73
282.45	23.84
282.22	23.93
282.21	23.95
282.45	23.89
282.88	23.88
283.44	23.81
283.82	23.89
284.04	23.99
284.51	24.24
284.47	24.13
284.37	24.07
285.21	24.19
285.74	23.7
285.49	23.9
285.56	23.87
286.56	24.54
286.62	24.34
286.79	24.19
286.75	24.35
287.35	24.38
287.91	24.41
287.93	24.2
287.92	24.23
287.99	25.02
287.74	24.66
288.94	24.77
289.67	24.69
289.7	24.91
290.04	24.87
289.95	24.91
290.05	24.71
290.33	24.74
291.25	24.67
291.63	24.69
292.2	25.11
292.18	24.87
292.04	25.02
291.95	25.01
292.97	25.06
293.06	24.64
292.86	24.77
293.15	25.03
293.57	25.97
293.35	24.8
294.51	25.36
294.98	25.28
294.81	24.97
295.46	25.26
295.54	25.56
295.5	25.48
296.15	25.49
296.78	25.28
296.81	25.84
296.75	25.78
297.12	25.54
297	25.7
297.17	25.67
298.24	25.21
298.67	25.8
298.49	25.84
298.83	25.59
299.19	25.88
299.68	25.82
299.55	25.74
299.51	26.04
301.32	26.24
300.98	26.1
301.06	25.93
300.91	26.23
301.76	26.37
301.65	26.31
302.14	25.96
301.8	24.85
302.5	21.34
303.2	21.23
303.32	21.57
303.02	21.74
303.39	22.06
304.41	21.98
304.54	21.66
304.53	21.58
304.75	21.76
304.55	21.88
304.66	21.73
306.58	22.15
306.81	21.87
306.44	21.91
306.56	22.15
307.83	21.79
307.56	22.37
307.24	22.29
307.85	22.32
308.17	22.42
308.74	22.42
308.72	22.58
308.8	22.32
309.13	22.43
309.8	22.5
309.81	22.56
310	22.61
310.12	22.54
311.28	22.73
311.25	22.57
311.38	22.58
311.45	22.34
312.81	23.04
312.86	22.77
312.71	22.93
312.9	22.95
313.59	23.23
313.94	23.14
314.06	23.05
313.78	23.12
314.2	23.1
314.26	23.17
314.27	23.24
314.12	23.28
315.1	23.1
316.42	23.22
316.34	23.1
315.93	23.39
316.2	23.29
316.54	23.17
316.71	23.54
318.54	23.67
318.27	23.63
318.37	23.41
318.67	23.33
319.36	23.97
319.31	23.61
319.41	23.67
319.65	23.59
320.72	23.72
320.89	23.77
320.68	23.83
320.9	23.81
321.55	24.39
322.29	24.23
322.3	24.06
322.24	24.2
322.92	24.12
323.41	24.23
323.57	24.43
323.55	24.33
323.51	24.44
324.55	24.47
324.56	24.34
324.65	24.67
324.7	24.36
324.7	24.54
324.73	24.97
326.45	24.63
326.54	25.09
326.71	25.07
326.71	24.77
327.92	24.78
328.04	25.34
328.83	25.14
329.01	25.04
329.23	25.34
329.24	25.11
329.29	25.16
329.45	25.23
330.3	25.32
330.76	25.33
330.85	25.2
330.55	25.33
331.21	25.36
331.78	25.77
331.92	25.63
332.17	25.74
332.17	25.49
333.06	25.95
333.07	25.69
333.18	25.7
333.24	25.73
332.26	25.8
332.34	25.6
332.48	25.82
332.29	25.69
333.12	26.05
333.45	25.79
333.76	25.96
333.45	26.27
334.09	26.15
334.85	26.06
334.92	26.2
335.35	26.37
335.29	25.9
335.11	26.01
335.26	26.3
337.08	26.53
337.12	26.56
336.94	26.31
337.14	26.57
338.47	25.83
338.19	26.6
338.39	26.68
338.26	26.47
338.93	26.6
339.66	26.94
339.47	26.74
339.62	26.97
339.75	26.99
340.96	27.07
340.78	27.2
340.88	27.15
341.13	27.18
342.13	27.32
341.96	27.07
342.32	27.22
342.17	27.29
342.98	27.27
343.18	27.15
343.38	27.75
343.62	27.2
343.59	27.46
343.95	27.41
345.25	27.4
345.19	27.66
345.16	27.32
345.35	27.64
345.9	27.9
346.5	27.76
346.84	27.74
347.2	27.78
347.32	27.86
347.55	28.18
347.77	27.78
347.56	27.96
347.6	27.95
349.49	28.27
349.31	28.27
349.35	28.21
349.44	28.34
350.5	28.45
350.52	28.38
350.91	28.39
350.86	28.53
351.68	28.33
351.8	28.37
351.76	28.54
352.05	28.65
352.57	28.94
353.05	28.69
353.22	28.84
353.32	28.95
353.7	29.08
354.52	29.12
354.11	29.12
354.7	29.08
354.47	28.95
353.36	29.18
353.55	28.74
353.72	28.75
353.56	29.12
353.55	29.16
353.69	29.17
352.34	29.04
352.35	29.11
352.05	28.89
352.19	28.78
351.8	28.83
351.74	28.9
351.58	28.72
351.75	28.67
350.91	28.62
350.59	28.81
350.64	28.62
350.65	28.75
350.45	28.47
350.69	28.49
350.48	28.73
350.59	28.53
350.11	28.29
348.17	28.08
348.44	28.34
348.32	28.55
348.51	28.45
347.63	27.97
347.74	28.15
347.95	28.17
347.8	28.26
346.98	28.05
346.78	28.17
347.07	28.25
346.58	28.03
346.63	28.2
346.67	28.09
345.75	27.86
345.44	27.62
345.13	27.49
344.43	27.78
344.77	27.8
344.65	27.8
344.37	27.61
343.76	27.36
343.81	27.36
343.72	27.38
343.78	27.31
342.55	27.42
342.78	27.14
342.52	27.21
342.7	27.25
342.04	27.33
341.75	27.44
341.84	27.25
341.77	27.34
342.61	27.64
342.08	27.24
341.8	27.36
342.25	27.12
340.21	26.93
339.76	26.82
339.68	26.94
339.99	27.06
339.73	26.69
339.73	27.18
339.86	27.06
338.54	26.63
338.34	26.92
338.36	26.9
338.38	26.51
338.27	26.7
338.66	26.71
336.82	26.74
336.63	26.45
336.75	26.27
336.74	26.59
336.41	26.07
336.43	26.13
335.46	26.34
335.36	26.17
334.59	26.85
335.27	26.31
335.35	26.54
335.14	26.14
333.81	25.75
333.68	26.05
333.62	26
333.72	26.02
333.28	26.01
332.81	25.81
332.58	25.95
332.53	26
332.36	25.89
331.54	26.01
331.46	25.91
331.37	25.65
331.37	25.76
330.61	25.73
330.39	25.38
330.22	25.63
330.31	25.22
330.2	25.65
330.42	25.66
329.16	25.9
328.98	25.26
328.92	25.17
329.18	25.27
328.29	24.99
327.92	25.21
327.69	25.12
327.74	25.3
327.45	25.03
326.6	24.93
326.69	24.87
326.57	24.96
326.35	24.95
325.44	24.66
325.53	24.9
325.27	24.79
325.39	24.83
324.75	25.1
324.57	24.7
324.71	24.64
324.6	24.92
323.37	24.36
323.27	24.58
323.53	24.91
323.52	24.46
323.32	24.37
323.27	24.27
322.06	24.19
321.76	24.24
321.34	24.46
321.38	24.36
321.43	24.32
321.52	24.29
321.19	24.21
320.13	24
320.15	24.21
319.68	23.28
319.33	24.09
319.52	23.81
319.55	24.18
318.87	23.9
318.76	23.95
318.63	24.08
318.73	23.61
317.49	23.27
317.51	23.76
317.36	23.47
317.23	23.52
316.69	23.76
316.63	23.53
315.93	23.51
315.81	23.38
316.5	23.62
315.91	23.8
316.41	23.42
316.18	23.77
316	23.4
315	23.04
314.34	23.63
314.91	23.38
314.45	23.12
313.52	23.13
313.26	22.62
312.86	23.13
312.81	23.06
312.83	23.1
312.91	22.93
312.7	23.08
312.62	23.19
311.27	22.59
311.25	22.62
311.35	22.98
311.1	22.92
311.06	22.96
310.4	22.67
310.66	22.93
310.26	22.77
309.88	22.69
309.4	22.35
309.17	22.84
309.02	22.42
309.18	22.86
309.04	22.53
308.96	22.11
308.19	22.25
307.81	22.08
307.96	22.31
307.63	22.43
306.79	21.56
307	22.11
306.99	22.35
306.78	22.4
306.32	22.13
305.8	22.21
306	22.09
305.92	21.96
305.48	22.26
304.88	21.81
304.71	22.05
304.89	22.01
304.39	21.92
303.91	21.74
303.95	21.94
303.93	21.54
303.82	21.81
302.9	21.81
302.95	21.75
302.44	21.64
302.71	21.67
301.53	21.01
301.33	21.37
301.39	21.64
301.55	21.43
300.48	21.41
300.3	21.34
300.63	21.74
300.35	21.66
299.86	21.56
299.17	21.48
299.56	21.06
299.21	21.36
298.96	21.34
299.1	21.38
298.99	21.08
297.82	21.03
297.92	20.81
297.83	20.95
298.01	21.04
296.82	20.91
296.73	20.65
296.74	20.93
296.57	20.86
295.59	20.56
295.68	20.76
295.35	20.54
295.58	20.58
295.09	20.44
294.73	20.64
294.66	20.71
294.91	20.52
294.3	20.39
293.42	20.51
293.58	20.41
293.65	20.83
293.33	20.66
292.53	20.38
292.54	20.41
292.5	20.53
292.47	20.28
292.43	20.41
292.49	20.32
291.57	20.29
291.44	20.01
291.25	20.77
291.11	20.15
291.17	19.98
291.11	20.14
290.28	19.75
289.9	20.18
289.75	20.01
289.93	19.98
289.13	20.01
288.69	19.77
288.61	20.12
288.33	19.96
288.51	19.87
288.69	19.94
288.5	19.88
287.49	19.44
287.59	19.9
287.64	19.7
287.68	19.89
287.7	19.87
287.56	19.88
287.69	19.86
287.75	19.83
285.4	19.65
285.07	19.8
284.74	19.57
285.16	19.4
285.1	19.52
285.11	19.52
283.53	18.85
283.48	19.38
283.72	19.4
283.47	19.15
283.02	19.24
282.42	19.48
282.66	19.16
282.45	19.39
281.84	19.43
281.45	19.16
281.36	19.12
281.18	19.07
281.02	18.68
280.47	18.92
280.22	18.93
280.3	19.1
280.29	19.2
280.08	19.37
280.55	18.82
278.77	18.51
278.96	18.82
278.72	18.41
278.65	18.68
277.52	18.9
277.72	18.38
277.5	18.46
277.54	18.54
276.92	18.32
276.55	18.82
276.2	18.32
276.24	18.44
275.79	18.57
275.5	18.2
275.46	18.48
275.49	18.64
275.12	18.49
274.45	18.29
274.48	18.4
274.25	18.24
274.2	18.19
273.71	18.32
273.43	17.99
273.39	18.53
273.39	17.67
273.13	17.69
273.33	17.98
271.89	18.01
271.69	17.69
272	18.1
271.75	18.04
270.76	17.68
270.5	17.94
270.35	17.79
270.44	17.69
270.11	17.86
269.47	17.96
269.53	17.79
269.68	17.8
269.31	17.69
268.47	17.5
268.54	20.28
268.38	22.04
268.23	22.4
267.43	21.9
267.14	22.08
267.34	22.12
267.47	22.09
266.66	21.98
266.25	21.74
264.87	21.68
266.22	21.9
266.02	22.08
266.24	22.03
265.27	21.52
264.7	21.71
264.78	21.63
264.88	21.55
264.89	22.07
263.86	21.51
263.58	22.58
263.2	21.51
263.29	21.4
263.22	21.35
263.07	21.41
263.21	21.44
263.25	21.61
261.63	21.6
261.62	21.65
261.64	22.16
261.49	22.4
260.53	22.05
260.34	21.37
260.47	21.74
260.36	21.38
259.49	21.59
258.95	21.31
259.19	21.33
259.11	21.73
258.71	21.82
258.11	20.44
258.45	21.02
258.04	21.36
258.07	21.62
257.18	21.62
257.12	21.01
256.95	21.7
257.09	20.88
256.18	21.07
256.05	21.61
256.03	21.45
256.14	21.48
255.92	21.49
256.06	21.43
254.15	21.11
254.34	21.6
254.7	21.75
254.32	21.84
253.89	21.65
253.85	21.03
253.58	21.51
253.69	22.77
253.16	21.76
252.76	21.17
252.46	21.71
252.64	21.36
252.44	21.82
251.47	20.87
251.56	21.47
251.57	20.55
251.2	21.44
250.03	23.69
250.12	22.03
250.13	23.19
250.21	24.15
249.35	24.5
249.18	22.97
248.82	23.22
249.21	22.35
248.53	23.47
247.92	23.64
248.14	23.9
247.87	23.45
247.26	23.56
247.02	23.45
246.73	23.67
246.72	23.44
246.49	23.35
245.71	24.24
245.64	23.49
245.7	23.33
246.05	23.52
245.82	23.87
245.59	23.46
244.95	23.75
244.7	24.23
243.61	23.52
243.55	23.24
243.51	23.06
243.39	23.19
243.33	22.89
243.24	23.4
242.36	22.82
241.77	23.28
241.67	23.38
241.79	23.51
241.22	24.05
241.17	23.27
240.9	23.26
240.91	23.11
240.42	23.21
239.33	23.21
239.56	23.14
239.5	23.52
239.54	23.71
239.05	23.57
238.51	22.89
238.44	23.29
238.55	23.44
237.18	23.31
237.18	22.68
237.41	23.29
237.54	23.01
236.81	23.27
236.27	23.21
236.29	23.35
236.27	23.14
236.15	23.02
236.22	22.84
235.84	22.85
234.64	23.17
234.85	23.3
234.74	23.48
234.38	22.85
233.8	22.82
233.85	23.12
233.93	23.17
233.65	22.85
232.54	22.48
232.41	23.13
232.46	23.09
232.63	23.35
231.51	22.82
231.77	23.17
231.71	22.58
231.86	22.61
230.51	24
230.74	22.7
230.54	22.59
230.24	22.91
229.8	22.76
229.39	22.33
229.39	22.25
229.33	22.58
228.95	22.43
228.42	22.35
228.13	22.07
228.27	22.78
228.44	22.78
228.47	22.52
228.28	23.12
226.79	22.33
226.82	22.66
226.55	22.45
226.52	22.73
226.11	22.43
226.39	22.36
226.27	22.7
226.12	22.2
224.01	21.82
224.23	21.99
224.59	22.01
224.56	21.9
223.89	21.72
223.79	22.05
223.43	21.98
223.41	22.29
223.2	22.1
222.43	22.47
222.03	21.81
222.02	22.03
222.53	21.79
221.18	22.16
221.26	21.38
221.33	21.58
220.98	21.91
220.33	22.13
220.23	21.74
220.23	21.76
219.95	21.59
219.52	21.75
219.04	21.63
219.95	21.68
219.15	21.7
219.82	21.78
219.27	21.62
218.49	21.91
217.67	21.72
217.91	21.12
217.83	21.44
217.2	21.27
217.06	21.53
216.97	21.43
216.8	21.39
216.49	21.37
215.48	21.72
215.44	21.24
215.41	21.36
215.2	21.25
214.16	21.15
214.63	21.36
214.02	21.25
214.44	21.43
212.81	21.5
213.61	21
213.08	21.14
212.96	20.88
212.26	20.95
212.03	20.78
212.09	21.16
212.02	21.15
212.14	20.81
212.39	21.06
211.78	20.77
210.66	21.05
210.73	20.8
210.47	21.18
210.62	20.69
209.81	20.59
209.39	21.1
208.79	20.5
209.02	20.61
208.8	20.64
209.11	20.44
209.02	20.7
209.11	20.46
207.84	20.14
207.28	20.18
207.09	20.43
207.11	20.49
207.08	20.44
207.1	20.47
206.29	20.38
205.39	20.29
205.49	20.06
205.46	20.61
205.11	20.23
205.31	20.01
205.33	20.46
205.19	20.17
205.03	20.42
203.43	19.64
203.37	19.8
203.47	20.31
203.31	20.25
202.41	20.05
202.17	20.2
202.14	20.15
202.17	19.9
202.11	19.98
202.06	19.6
201.29	19.86
200.79	20.26
200.61	19.77
200.64	20.1
200.84	20.09
200.65	19.95
199.87	19.73
199.36	19.6
199.08	19.83
198.6	20.25
198.61	20.13
198.88	19.98
198.39	19.56
197.75	19.83
197.63	19.22
197.61	24.05
197.67	24.03
196.82	21.95
196.59	19.39
196.45	19.33
196.52	20.01
196.48	24.08
196.16	24.09
195.09	24.28
195.15	23.77
194.91	24.07
194.86	19.9
194.15	23.31
193.78	23.84
193.82	23.59
193.49	24.35
193.08	23.89
192.94	23.53
192.58	23.67
192.18	23.72
191.7	24.03
192.12	21.85
191.95	24.07
191.65	23.29
191.64	24.65
190.37	23.48
190.58	23.54
190.48	23.58
190.27	23.36
189.05	23.56
189.01	23.43
188.96	24.54
188.94	24.49
188.12	23.69
188.15	24.8
188.22	22.99
188.3	24.27
186.9	22.96
187.03	23.5
187.22	24.26
187.18	23.9
186.42	24
186.01	24.28
185.82	24.18
185.79	24.51
185.58	23.96
184.73	24.02
[truncated: 673 more rows]

## Sheet: Fig2EFG
Fig 2E		Fig 2F		Fig 2G
time, s	Pos, nm	time, s	Pos, nm	time, s	Pos, nm
0	207.51	0.005	206.35	0	217.16
0.005	207.58	0.01	204.88	0.102	213.7
0.008	207.35	0.015	204.03	0.195	210.17
0.014	208.25	0.021	204.57	0.296	211.57
0.02	208.17	0.025	204.27	0.393	214.18
0.025	207.25	0.031	202.61	0.498	215.35
0.029	207.42	0.036	201.83	0.598	211.94
0.035	208.4	0.04	201.89	0.695	213.64
0.039	208.89	0.045	201.67	0.796	212.79
0.045	208.15	0.052	204.36	0.899	212.36
0.049	208.69	0.055	204.74	1	213.36
0.055	209.87	0.06	205.39	1.101	219.32
0.06	209.5	0.065	205.05	1.131	218.15
0.065	208.6	0.072	203.29	1.136	215.76
0.069	208.95	0.075	203.61	1.14	213.54
0.077	208.44	0.082	204.15	1.146	213.63
0.079	209.09	0.086	205.44	1.152	214.05
0.087	209.61	0.091	204.24	1.155	214.17
0.089	209.48	0.095	204.03	1.161	213.04
0.094	209.33	0.101	205.33	1.166	215.54
0.1	209.61	0.106	206.7	1.171	216.17
0.104	208.33	0.111	206.88	1.176	217.5
0.11	207.16	0.115	204.07	1.18	219.23
0.114	206.77	0.12	204.28	1.186	219.72
0.119	207.08	0.126	204.76	1.19	219.46
0.124	208.16	0.131	203.74	1.194	219.45
0.13	208.18	0.135	204.13	1.2	220.89
0.134	207.72	0.14	205.39	1.206	220.88
0.14	206.26	0.146	205.57	1.21	221.51
0.144	206.58	0.15	203.81	1.215	218.91
0.149	207.08	0.156	204.52	1.219	219.15
0.154	206.88	0.16	204.96	1.225	221.25
0.161	208.05	0.166	207.67	1.23	220.67
0.164	209.33	0.17	206.25	1.235	220.8
0.171	210.78	0.176	205.43	1.24	221.08
0.173	210.39	0.18	204.55	1.246	221.16
0.179	211.35	0.186	204.93	1.249	219.79
0.185	211.39	0.19	202.91	1.256	217.28
0.192	208.83	0.195	202.04	1.26	217.85
0.194	209.3	0.2	201.23	1.265	216.59
0.201	207.53	0.207	203.02	1.27	216.65
0.204	207.27	0.21	202.51	1.277	215.54
0.211	206.04	0.217	204.8	1.28	215.06
0.215	207.04	0.22	204.88	1.286	214.37
0.22	206.99	0.225	204.08	1.29	213.8
0.225	207.54	0.23	204.73	1.297	216.51
0.23	208.39	0.237	206.97	1.301	217.67
0.234	208.02	0.24	206.16	1.304	209.85
0.24	208.14	0.248	207.86	1.311	181.3
0.244	207.39	0.251	206.93	1.316	154.92
0.249	208.12	0.256	208.12	1.319	137.78
0.255	209.07	0.26	209.08	1.327	117.78
0.259	207.77	0.268	208.01	1.332	112.66
0.265	205.88	0.27	207.98	1.335	102.68
0.269	205.86	0.276	209.79	1.341	94.41
0.275	205.98	0.28	209.16	1.345	85.77
0.279	205.18	0.286	207.44	1.351	79.55
0.285	207.08	0.291	207.34	1.356	75.26
0.289	207.3	0.295	205.75	1.359	69.14
0.295	207.7	0.301	205.09	1.365	66.46
0.298	207.47	0.306	205.44	1.372	62.33
0.305	207.83	0.31	205.65	1.375	58.16
0.309	207.45	0.316	206.56	1.38	53.27
0.314	208.24	0.321	204.34	1.385	52.3
0.319	208	0.325	203.4	1.392	49.34
0.326	208.44	0.33	202.83	1.395	45.44
0.328	208.98	0.335	205.01	1.401	43.19
0.336	208.91	0.342	206.31	1.405	43.65
0.34	209.18	0.345	207	1.411	41.18
0.344	209.22	0.352	209.61	1.415	41.48
0.35	209.72	0.355	209.45	1.422	39.83
0.356	208.75	0.361	207.3	1.425	38.73
0.36	208.13	0.365	206.58	1.433	38.87
0.367	206.49	0.372	206.77	1.436	40.13
0.369	206.26	0.375	206.99	1.442	39.13
0.375	205.25	0.382	206.31	1.444	38.57
0.379	204.86	0.385	206.61	1.453	38.54
0.385	206.31	0.391	206.63	1.456	39.74
0.389	206.34	0.395	206.56	1.46	38.68
0.395	207.61	0.402	205.26	1.465	37.86
0.399	207.32	0.405	206.03	1.471	39.6
0.405	207.52	0.411	207.39	1.475	38.99
0.41	207.48	0.415	207.58	1.481	38.8
0.414	207.54	0.421	206.71	1.485	38.18
0.42	207.76	0.426	207.28	1.49	38.52
0.424	207.04	0.431	206.7	1.496	35.66
0.432	206.88	0.435	206.32	1.501	33.83
0.434	206.81	0.441	204.69	1.506	33.4
0.439	207.37	0.445	203.41	1.51	34.13
0.443	208.44	0.451	203.81	1.517	32.84
0.45	207.82	0.455	202.77	1.521	32.32
0.454	207.56	0.461	201.35	1.525	30.36
0.461	208.3	0.467	203.42	1.53	29.6
0.464	207.48	0.47	203.56	1.537	28.85
0.471	208.7	0.475	201.97	1.54	28.45
0.474	209.48	0.48	203.01	1.546	27.53
0.48	210	0.486	205.64	1.55	28.09
0.484	207.72	0.49	204.91	1.555	28.55
0.49	208.33	0.495	204.04	1.561	28.67
0.493	208.64	0.5	203.65	1.567	25.68
0.502	207.08	0.506	203.48	1.569	24.53
0.505	208.31	0.51	201.33	1.576	23.88
0.509	208.95	0.517	202.08	1.581	24.41
0.514	208.86	0.52	201.42	1.588	26.37
0.52	206.93	0.525	203.91	1.59	24.29
0.524	207.19	0.53	205.8	1.597	23.77
0.53	207.34	0.537	206.17	1.6	26.91
0.534	207.94	0.541	207	1.606	27.85
0.539	208.39	0.547	207.19	1.608	27.1
0.545	209.47	0.55	206	1.618	23.58
0.551	209.48	0.556	205.77	1.622	25.16
0.554	209.48	0.56	205.04	1.625	25.89
0.561	209.87	0.566	205.56	1.63	25.84
0.563	210.47	0.57	206.39	1.635	23.06
0.569	210.06	0.576	205.61	1.64	21.82
0.574	209.33	0.58	203.97	1.646	19.7
0.579	210.52	0.586	204.02	1.652	20.52
0.585	210.99	0.591	204	1.655	21.85
0.589	210.14	0.595	203.78	1.66	23.67
0.594	209.3	0.601	205.22	1.666	24.09
0.599	209.22	0.605	204.92	1.671	21
0.605	210.78	0.61	205.21	1.675	20.38
0.61	209.74	0.615	207.63	1.681	23.49
0.614	210	0.621	208.36	1.686	24.03
0.618	209.78	0.625	208.58	1.692	24.04
0.626	209.42	0.631	207.24	1.694	25.02
0.629	209.69	0.635	207.65	1.701	24.74
0.636	209.56	0.64	208.01	1.706	24.09
0.639	208.39	0.645	206.91	1.71	22.94
0.645	207.75	0.652	204.92	1.715	21.02
0.649	208.13	0.655	206.29	1.721	19.96
0.656	208.25	0.661	205.36	1.725	20.98
0.659	208.57	0.665	206.01	1.732	22.51
0.664	207.85	0.672	203.72	1.734	22.92
0.669	208.72	0.675	201.56	1.74	24.17
0.677	208.44	0.682	202.75	1.746	24.29
0.679	208.13	0.685	203.97	1.753	23.21
0.685	208.11	0.691	203.56	1.755	22.38
0.688	207.82	0.695	205	1.761	16.67
0.695	208.18	0.703	204.94	1.764	17.06
0.7	208.48	0.705	205.81	1.772	18.84
0.705	208.25	0.711	205.26	1.775	19.83
0.71	207.61	0.716	207.47	1.783	16.37
0.714	207.87	0.721	206.91	1.786	16.26
0.719	207.66	0.725	206.48	1.792	16.27
0.725	207.35	0.731	205.59	1.795	16.13
0.73	207.1	0.736	206.38	1.801	13.86
0.734	206.96	0.741	206.53	1.804	15.12
0.74	207.86	0.745	206.76	1.811	17.89
0.744	207.66	0.75	206.71	1.817	20.65
0.751	207.81	0.755	205.88	1.82	21.08
0.754	207.61	0.76	206.53	1.825	21.57
0.758	208.14	0.766	207.37	1.832	23.77
0.764	207.96	0.77	206.01	1.835	23.76
0.771	208.93	0.775	203.93	1.84	22.88
0.774	208.49	0.78	204.27	1.844	21.17
0.78	207.11	0.786	204.71	1.85	20.24
0.784	206.74	0.79	206.14	1.857	22.34
0.791	207.79	0.797	206.1	1.86	22.89
0.794	207.71	0.8	206.29	1.866	23.99
0.8	208.76	0.806	205.09	1.87	24.92
0.804	207.66	0.809	205.08	1.874	24.07
0.812	208.44	0.817	203.33	1.88	25.05
0.813	208.44	0.82	204.36	1.886	25.73
0.822	209.22	0.826	205	1.89	25.28
0.825	209.81	0.83	205.91	1.897	23.88
0.831	210.84	0.837	206.1	1.9	22.77
0.835	210	0.84	206.87	1.905	22.45
0.839	208.89	0.847	204.36	1.91	23.47
0.844	207.25	0.85	206.81	1.916	24.94
0.85	204.97	0.856	206.5	1.921	23.77
0.856	206.15	0.86	205.57	1.926	24.36
0.859	206.77	0.868	208.01	1.929	24.19
0.865	206.79	0.87	206.43	1.938	24.5
0.869	207.77	0.876	205.55	1.942	24.5
0.875	208.6	0.88	205.17	1.947	22.69
0.879	207.99	0.886	205.27	1.95	21.91
0.885	208.32	0.89	204.73	1.957	22.54
0.889	207.72	0.896	203.23	1.96	20.86
0.896	207.08	0.9	204.06	1.968	21.55
0.899	207.61	0.905	205.23	1.969	20.79
0.905	208.44	0.911	207.18	1.975	18.46
0.909	208.51	0.916	205.93	1.981	20
0.917	207.75	0.921	205.45	1.986	20.94
0.918	207.66	0.925	206.18	1.99	21.52
0.924	209.02	0.931	206.65	1.996	21.52
0.929	208.65	0.935	204.1	2	23.04
0.936	208.89	0.94	204.9	2.005	23.01
0.938	208.07	0.945	206.93	2.012	23.32
0.945	209.01	0.952	208.13	2.015	24.42
0.95	208.24	0.955	207.82	2.022	24.13
0.957	208.7	0.96	205.56	2.026	21.8
0.96	207.66	0.965	204.91	2.03	19.43
0.966	208.05	0.972	206.76	2.036	16.43
0.969	207.82	0.975	205.44	2.041	14.9
0.975	207.54	0.982	205.44	2.045	16.37
0.98	208.09	0.985	205.26	2.051	15.36
0.985	208.29	0.991	205.26	2.055	15.18
0.99	209.14	0.995	204.5	2.062	15.7
0.995	209.16	1.003	204.39	2.066	14.98
1	210.15	1.005	205.33	2.069	12.31
1.004	209.95	1.013	206.33	2.075	9.57
1.008	209.22	1.015	206.23	2.082	6.17
1.014	209.72	1.021	208.4	2.085	5.18
1.02	209.56	1.025	207.52	2.091	5.95
1.024	208.72	1.033	204.89	2.094	5.96
1.029	207.43	1.036	204.29	2.101	7.03
1.034	206.73	1.041	203.67	2.105	6.33
1.041	207.45	1.048	202.51	2.112	8.66
1.044	208.38	1.05	203.3	2.115	9.31
1.051	207.66	1.055	205.55	2.122	10.17
1.054	207.81	1.061	206.08	2.124	11.74
1.06	209.54	1.066	205.92	2.132	11.87
1.063	209.43	1.07	206	2.136	10.65
1.07	210.17	1.076	204.05	2.14	7.94
1.074	209.76	1.08	204.94	2.146	7.43
1.08	210.89	1.086	206.29	2.151	5
1.085	210.65	1.09	206.69	2.155	7.94
1.092	210.52	1.095	206.25	2.161	8.93
1.094	210.21	1.1	206.46	2.167	8.41
1.102	210.26	1.106	208.39	2.17	8.25
1.105	209.22	1.11	208.93	2.176	8.69
1.11	208.51	1.117	208.75	2.18	10.59
1.115	207.55	1.12	208.38	2.186	12.8
1.12	208.96	1.126	208.87	2.19	11.67
1.125	209.26	1.13	207.4	2.197	13.51
1.131	208.7	1.135	205.86	2.2	13.27
1.134	208.86	1.14	205.7	2.206	15.25
1.14	208.77	1.146	205.56	2.21	16.72
1.144	209.27	1.15	204.87	2.217	16.03
1.149	208.74	1.156	205.82	2.22	17.54
1.155	208.54	1.161	207	2.225	17.48
1.159	208.11	1.168	205.81	2.231	17.58
1.164	208.72	1.17	205.51	2.237	15.56
1.17	208.2	1.176	206.36	2.24	16.48
1.175	207.61	1.181	206.4	2.248	14.19
1.179	208.44	1.186	205.25	2.249	14.57
1.186	208.77	1.19	206.94	2.256	14.76
1.189	208.44	1.196	207.23	2.261	13.79
1.194	207.12	1.201	205.39	2.267	14.28
1.199	206.65	1.205	204.22	2.271	13.22
1.206	206.81	1.21	205.3	2.278	13.8
1.21	207.12	1.217	206.61	2.28	12.8
1.215	207.83	1.22	205.29	2.286	11.18
1.219	208.24	1.225	205.85	2.291	10.9
1.227	209.74	1.231	206.88	2.296	12.04
1.23	210.41	1.235	207.11	2.301	12.51
1.236	211.01	1.24	205.41	2.306	12.61
1.239	210.31	1.245	205.13	2.311	10.64
1.245	210.25	1.252	206.43	2.315	8.65
1.25	209.8	1.255	205.85	2.32	8.67
1.256	211.17	1.262	205.34	2.325	8.22
1.258	209.96	1.265	204.12	2.332	5.9
1.267	208.83	1.271	204.38	2.335	5.77
1.27	208.36	1.275	204.82	2.34	6.46
1.275	207.38	1.282	204.75	2.344	8.16
1.279	207.82	1.285	205.35	2.351	13.16
1.284	207.5	1.292	205.36	2.355	15.46
1.289	206.58	1.295	204.73	2.36	16.46
1.295	206.75	1.301	205.15	2.366	15.09
1.298	206.92	1.306	205.45	2.371	14.49
1.304	208.61	1.312	207.59	2.374	15.11
1.311	209.53	1.315	207.66	2.381	17.29
1.315	208.72	1.321	207.34	2.385	18.22
1.32	210.95	1.326	206.12	2.39	18.28
1.323	211.04	1.331	206.42	2.395	16.91
1.328	210.74	1.335	206.09	2.401	12.2
1.334	208.7	1.342	205.61	2.405	14.06
1.34	206.88	1.345	205.21	2.412	13.83
1.344	206.16	1.351	205.9	2.414	13.78
1.35	207.42	1.356	206.2	2.42	12.65
1.354	207.84	1.361	207.66	2.425	12.99
1.36	208.27	1.366	206.82	2.432	13.43
1.363	208.17	1.37	206.74	2.436	12.99
1.371	208.44	1.376	207.35	2.442	12.52
1.375	208.34	1.38	206.67	2.444	13.17
1.38	210.33	1.386	208.39	2.451	14.61
1.383	209.42	1.39	206.92	2.456	15.67
1.391	209.03	1.397	207.18	2.462	17.83
1.395	208.31	1.4	206.9	2.466	17.37
1.402	208.44	1.405	207.74	2.471	16.44
1.404	208.98	1.41	207.56	2.475	16.87
1.41	206.74	1.417	207.31	2.481	16.81
1.414	206.88	1.42	205.33	2.486	19.3
1.421	206.88	1.427	206.45	2.49	20.56
1.423	207.47	1.43	207.87	2.496	24.34
1.429	208.39	1.435	207.07	2.5	26.12
1.435	207.91	1.44	205.88	2.507	25.37
1.44	207.66	1.447	207.21	2.51	26.13
1.444	206.65	1.45	207.81	2.515	28.79
1.449	207.01	1.456	207.3	2.52	30.19
1.455	207.37	1.46	206.46	2.526	29.45
1.46	208.18	1.467	205.9	2.53	29.33
1.464	208.39	1.47	205.69	2.536	30.66
1.469	209.43	1.477	205.81	2.539	32.9
1.475	209.84	1.481	206.37	2.546	34.66
1.479	208.86	1.486	206.85	2.55	34.14
1.485	208.25	1.49	208.25	2.555	34.35
1.489	208.6	1.496	205.51	2.561	35.89
1.494	210	1.501	203.85	2.567	38.57
1.5	210	1.505	203.89	2.569	38.3
1.506	209.14	1.51	204.6	2.577	35.61
1.508	209.28	1.516	206.86	2.581	36.48
1.516	209.03	1.521	206.81	2.585	36.99
1.52	208.59	1.525	206.09	2.59	35.17
1.524	209.61	1.53	204.95	2.596	34.58
1.529	208.05	1.536	204.36	2.6	34.77
1.536	207.8	1.54	203.94	2.606	33.12
1.539	208.05	1.545	202.78	2.609	32.26
1.545	208.49	1.551	200.93	2.615	30.7
1.549	207.94	1.555	201.06	2.622	30.61
1.556	208.64	1.561	204.39	2.628	27.54
1.56	208.4	1.565	204.54	2.63	25.88
1.567	206.49	1.57	204.15	2.635	25.69
1.569	207.58	1.575	205.28	2.639	27.37
1.574	208.02	1.582	206.32	2.646	25.34
1.578	208.4	1.585	206.27	2.652	23.96
1.585	208.91	1.591	205.9	2.655	24.35
1.59	208.28	1.595	204.98	2.662	24.69
1.594	208.08	1.602	204.1	2.664	23.2
1.6	208.75	1.605	204.12	2.67	19.16
1.605	207.16	1.612	202.67	2.675	18.91
1.609	207.34	1.615	203.93	2.682	16.16
1.615	207.6	1.621	204.64	2.686	15.11
1.62	207.18	1.626	204.05	2.692	13.83
1.624	207.83	1.633	203.74	2.694	14.53
1.63	207.16	1.635	204.93	2.701	14.36
1.634	207.66	1.641	205.77	2.706	15.68
1.639	208.56	1.646	206.3	2.713	15.65
1.644	209.69	1.653	208.06	2.715	16.71
1.651	208.37	1.655	207.56	2.719	17.23
1.654	208.65	1.661	207.48	2.725	17.49
1.659	210.39	1.666	207.62	2.732	18.31
1.664	209.84	1.671	207.17	2.734	17.95
1.671	208.79	1.676	207.11	2.743	19.13
1.674	207.88	1.68	207.29	2.746	18.13
1.68	208.44	1.685	208.18	2.75	17.52
1.684	208.31	1.691	207.22	2.755	19.68
1.689	208.49	1.696	205.15	2.761	21.93
1.694	209.27	1.701	205.3	2.765	21.76
1.701	208.75	1.705	206.05	2.771	23.18
1.703	209.31	1.71	206.63	2.777	24.23
1.712	209.48	1.717	205.44	2.78	24.95
1.715	209.18	1.72	205.36	2.786	24.56
1.719	209.27	1.725	206.67	2.791	24.95
1.725	210.08	1.73	204.92	2.796	24.53
1.732	210	1.737	201.91	2.801	25.23
1.734	209.22	1.74	204.42	2.805	23.57
1.74	209.46	1.747	205.85	2.811	23.22
1.744	207.94	1.75	205.6	2.816	23.58
1.75	207.72	1.755	205.75	2.819	23.16
1.755	208.48	1.76	205.54	2.826	21.82
1.759	208.74	1.767	205.7	2.831	22.5
1.765	208.49	1.77	205.32	2.835	20.46
1.769	208.39	1.776	205.25	2.84	18.63
1.774	209.49	1.78	205.13	2.846	15.7
1.78	210	1.787	204.37	2.85	14.26
1.785	211.01	1.791	203.95	2.856	14.37
1.789	211.56	1.796	204.41	2.859	15.53
1.795	210.62	1.801	205.29	2.867	17.19
1.799	210.83	1.806	206.08	2.871	16.81
1.804	210.52	1.81	206.21	2.877	17.7
1.81	210.68	1.816	207.23	2.88	18.31
1.815	209.09	1.821	207.47	2.887	18.97
1.818	208.29	1.826	207.68	2.889	20.23
1.825	208.05	1.83	206.69	2.898	22.64
1.828	208.96	1.836	205.16	2.9	22.13
1.836	209.33	1.841	204.57	2.905	22.55
1.839	208.78	1.845	205.43	2.91	22.59
1.846	207.66	1.851	205	2.917	22.41
1.85	207.75	1.855	206.84	2.92	24.77
1.855	207.48	1.86	204.48	2.925	27.77
1.859	206.51	1.865	203.48	2.93	30.26
1.866	208.96	1.87	204.62	2.936	29.94
1.868	208.65	1.875	205.77	2.942	29.13
1.875	209.52	1.882	205.94	2.946	29.49
1.88	211.27	1.885	204.98	2.951	29.32
1.886	209.22	1.891	205.89	2.956	29.6
1.89	210.05	1.895	205.37	2.96	29.02
1.895	208.92	1.901	205.53	2.966	26.75
1.899	208.85	1.905	205.03	2.969	25.62
1.905	209.22	1.912	207.41	2.975	27.52
1.909	208.29	1.915	207.61	2.982	29.86
1.914	207.42	1.921	207.29	2.984	30.32
1.92	208.03	1.925	207.91	2.991	29.36
1.924	209.29	1.933	207.01	2.996	28.93
1.93	210.47	1.935	208.67	2.999	30.5
1.935	209.72	1.943	208.35	3.005	32.63
1.939	209.74	1.945	206.06	3.011	30.54
1.943	209.78	1.951	204.73	3.015	28.72
1.949	209.17	1.955	203.66	3.021	26.49
1.954	209.94	1.961	205.41	3.025	24.89
1.96	210.04	1.965	206.67	3.032	25.1
1.964	210.31	1.971	207.7	3.036	24.43
1.97	210.94	1.975	207.93	3.042	21.99
1.974	210.84	1.981	207.84	3.045	23.26
1.981	211.08	1.985	209.13	3.052	22.2
1.984	211.93	1.99	210.09	3.054	22.81
1.989	210.99	1.996	209.32	3.063	17.02
1.993	211.14	2	207.68	3.066	16.04
2.001	208.36	2.005	207.65	3.072	16.25
2.004	208.68	2.01	207.03	3.075	17.01
2.011	208.13	2.016	205.31	3.082	15.69
2.014	208.81	2.02	204.76	3.085	12.42
2.02	208.6	2.026	205.5	3.091	13.5
2.024	206.75	2.03	206.64	3.096	14.51
2.032	206.1	2.036	208.32	3.1	14.86
2.034	205.91	2.04	210	3.106	14.52
2.04	207.44	2.047	207.36	3.11	12.26
2.045	208.1	2.05	207.01	3.116	14.37
2.05	207.61	2.057	204.17	3.12	14.95
2.054	206.64	2.06	204.52	3.127	15.9
2.06	207.78	2.066	206.22	3.129	16.2
2.064	209.14	2.07	204.71	3.136	15.12
2.069	210.06	2.077	204.33	3.14	14.58
2.074	210.49	2.08	204.72	3.147	13.08
2.08	209.81	2.086	204.17	3.15	12.29
2.086	210.21	2.091	203.11	3.155	12.27
2.089	208.83	2.098	201.97	3.161	11.93
2.095	208.89	2.1	203.76	3.167	12.78
2.099	209.56	2.106	206.69	3.17	13.81
2.105	208.87	2.11	208.08	3.176	14.4
2.109	209.74	2.116	207.32	3.179	15.19
2.116	210.85	2.12	206.67	3.187	16.66
2.119	210.68	2.126	204.28	3.191	15.98
2.125	212.34	2.13	202.83	3.198	15.63
2.129	211.56	2.135	202.96	3.2	14.21
2.135	211.48	2.14	204.6	3.206	14.15
2.139	211.3	2.145	204.46	3.21	13.01
2.146	212.05	2.151	203.8	3.216	10.74
2.149	211.37	2.155	205.46	3.219	12.25
2.155	210.17	2.161	206.47	3.225	13.18
2.159	209.04	2.165	207.08	3.231	14.06
2.166	210.63	2.17	206.87	3.236	13.41
2.169	208.85	2.175	208.37	3.24	11
2.176	208.64	2.182	207.33	3.246	11.39
2.179	208.18	2.184	206.09	3.249	14.38
2.185	208.01	2.192	205.06	3.256	16.47
2.189	208.76	2.195	205.81	3.261	15.91
2.195	208.92	2.201	206.78	3.264	16.8
2.2	208.41	2.205	206.87	3.271	18.76
2.205	208.29	2.212	206.97	3.275	20.63
2.21	208.85	2.215	207.06	3.392	28.66
2.217	209.74	2.222	208.09	3.502	29.23
2.219	209.27	2.225	208.05	3.596	28.9
2.225	208.05	2.231	208.41	3.697	28.53
2.231	206.64	2.235	207.38	3.799	28.4
2.234	207.11	2.243	207.96	3.891	28.69
2.24	206.8	2.245	207.59	3.997	28.57
2.244	206.57	2.251	208.18	4.1	28.78
2.25	207.22	2.255	207.13	4.197	28.54
2.254	208.55	2.261	207.24	4.3	28.41
2.259	208.81	2.265	208.04	4.391	28.6
2.264	209	2.271	206.64	4.503	28.99
2.27	209.82	2.275	206.61	4.596	28.59
2.274	209.41	2.281	207.74	4.695	28.69
2.281	210.55	2.286	207.34	4.794	28.51
2.283	209.83	2.291	205.28	4.901	28.57
2.289	208.93	2.296	204.73	4.998	28.46
2.294	208.57	2.3	203.81	5.099	28.33
2.301	208.11	2.306	203.5	5.192	28.32
2.304	208.64	2.31	205.61	5.3	28.52
2.311	209.61	2.316	205.33	5.402	28.78
2.313	209.7	2.32	206.35	5.503	28.25
2.32	209.22	2.327	207.69	5.595	28.32
2.325	209.31	2.33	207.35	5.7	28.77
2.332	209.75	2.335	207.8	5.8	28.44
2.335	209.51	2.34	208.26	5.899	28.51
2.34	209.17	2.346	206.74	5.997	28.48
2.344	209.3	2.35	206.78	6.1	28.23
2.35	208.38	2.357	207.39	6.203	29.42
2.355	208.33	2.36	206.82	6.298	28.34
2.36	207.4	2.365	207.91	6.388	28.45
2.364	207.91	2.37	206.75	6.502	28.29
2.37	207.97	2.377	206.1	6.599	28.64
2.375	208.33	2.38	206.21	6.7	28.44
2.38	208.39	2.385	207.22	6.795	28.28
2.384	208.31	2.39	206.27	6.9	28.22
2.389	208.44	2.397	207.98	6.999	28.29
2.395	208.23	2.4	206.59	7.1	28.57
2.399	209.74	2.406	207.67	7.173	28.24
2.404	209.65	2.411	208.57	7.232	28.28
2.409	208.5	2.417	203.53	7.341	28.08
2.414	208.17	2.42	204.58	7.437	28.11
2.42	207.61	2.426	204.9	7.484	29.46
2.425	207.72	2.431	206.12	7.488	28.17
2.429	207.86	2.435	206.9	7.491	28.2
2.435	210.08	2.441	205.67	7.497	28.42
2.439	210.33	2.446	203.43	7.502	28.1
2.444	210.21	2.451	203.31	7.506	28.15
2.449	209.08	2.455	204.64	7.512	28.32
2.456	208.89	2.461	203.8	7.517	28.4
2.459	208.65	2.465	205.19	7.522	28.33
2.465	208.27	2.47	207.26	7.527	28.37
2.469	209.1	2.475	207.43	7.531	28.47
2.476	209.69	2.482	208.38	7.537	28.19
2.48	209.45	2.485	207.5	7.542	28.5
2.485	209.52	2.49	206.18	7.546	28.49
2.489	209.75	2.498	203.92	7.552	28.06
2.495	209.95	2.5	203.5	7.558	28.66
2.5	208.95	2.505	204.03	7.561	28.55
2.506	207.97	2.511	203.59	7.567	28.31
2.509	208.29	2.515	204.86	7.57	28.67
2.515	208.94	2.522	205.56	7.577	28.45
2.521	208.79	2.525	206.35	7.582	28.26
2.525	208.03	2.53	208.04	7.587	28.71
2.529	207.98	2.535	207.78	7.592	28.27
2.537	208.45	2.541	206.61	7.597	28.08
2.539	209.01	2.545	207.87	7.601	28.43
2.545	209	2.552	209.51	7.608	28.77
2.548	209.22	2.556	209.32	7.613	28.42
2.554	209.95	2.563	205.81	7.619	29.15
2.56	208.94	2.565	206.82	7.622	28.22
2.564	208.89	2.572	206.54	7.628	28.25
2.569	209.56	2.575	206.18	7.631	28.38
2.574	208.38	2.581	205.03	7.638	28.16
2.581	209.93	2.585	205.3	7.643	28.1
2.584	209.8	2.59	207.03	7.647	30.91
2.59	210.23	2.596	208.18	7.652	56.82
2.593	209.89	2.6	206.63	7.656	85.35
2.6	208.52	2.606	206.54	7.662	112.18
2.604	206.56	2.61	205.97	7.668	135.68
2.61	208.44	2.616	205.49	7.671	158.14
2.613	208.67	2.62	205.09	7.677	169.84
2.619	210.04	2.626	206.15	7.683	179.45
2.625	210.22	2.63	206.34	7.686	183.54
2.631	211.56	2.636	206.28	7.692	188.48
2.633	212.73	2.64	206.26	7.695	193.38
2.641	211.72	2.647	206.57	7.702	199.39
2.645	211.1	2.65	206.75	7.707	199.34
2.649	210.2	2.657	207.73	7.713	197.95
2.654	209.18	2.66	208.18	7.717	198.47
2.66	208.74	2.665	208.02	7.723	200.12
2.664	209.54	2.67	206.97	7.726	202.64
2.67	210.37	2.677	206.42	7.734	203.42
2.674	210.96	2.68	207.32	7.737	203.99
2.679	211.06	2.685	207.57	7.741	205.9
2.685	209.53	2.69	207.99	7.747	206.13
2.69	210.33	2.697	206.82	7.754	205.04
2.695	208.83	2.7	206.1	7.756	206.27
2.699	208.08	2.708	206.01	7.764	206.68
2.703	208.6	2.71	206.98	7.768	206.56
2.71	209.9	2.716	207.93	7.773	207.52
2.715	210.18	2.721	207.52	7.777	207.6
2.719	210.26	2.727	206.79	7.782	207.79
2.725	209.31	2.73	206.13	7.787	209.13
2.729	209.95	2.736	204.51	7.793	208.49
2.735	210	2.74	205.87	7.796	207.34
2.739	209.94	2.746	206.62	7.802	206.33
2.746	210.86	2.751	206.8	7.808	205.81
2.75	209.95	2.756	206.62	7.811	205.69
2.755	209.57	2.76	205.88	7.817	205.84
2.758	209.82	2.765	206.11	7.822	204.74
2.766	209.9	2.771	205.55	7.826	206.15
2.769	210.16	2.775	204.31	7.832	209.14
2.776	209.22	2.781	204.85	7.838	207.99
2.779	208.78	2.785	205.21	7.842	207.41
2.785	209.59	2.791	205.9	7.848	205.96
2.789	209.26	2.795	207.48	7.851	205.41
2.796	208.83	2.801	208.13	7.858	206.18
2.799	208.11	2.805	207.93	7.862	207.41
2.807	208.44	2.811	206.55	7.868	208.03
2.81	208.48	2.815	207.81	7.872	207.31
2.815	208.89	2.82	206.69	7.879	207.8
2.819	208.98	2.825	206.44	7.881	207.32
2.824	208.62	2.832	205.29	7.887	207.85
2.828	208.56	2.835	204.12	7.893	206.76
2.835	209.06	2.842	205.45	7.898	207.64
2.84	209.52	2.845	206.1	7.902	208.61
2.844	209.48	2.85	208.9	7.906	208.57
2.85	208.01	2.855	208.32	7.912	210.19
2.855	206.24	2.863	209.22	7.919	210.66
2.859	207.31	2.865	209.44	7.921	210.34
2.865	208.34	2.873	208.01	7.929	208.42
2.869	208.48	2.876	207.51	7.933	208.29
2.875	208.29	2.881	205.53	7.937	208.85
2.88	206.61	2.885	205.47	7.942	209.58
2.884	207.44	2.892	208.35	7.948	210.85
2.889	208.57	2.895	209.03	7.952	211.27
2.894	209.64	2.901	208.93	7.958	210.34
2.899	208.96	2.905	207.51	7.961	208.24
2.904	209.22	2.911	205.45	7.969	207.46
2.91	210.55	2.915	205.26	7.972	208.51
2.914	210.21	2.923	204.99	7.978	209.38
2.92	208.89	2.925	205.04	7.982	208.9
2.923	210.49	2.931	205.72	7.987	206.31
2.931	210.56	2.935	206.5	7.991	205.86
2.934	211.12	2.94	207.19	7.997	207.61
2.942	211.04	2.946	207.65	8.003	207.61
2.944	210.78	2.95	207.88	8.006	207.45
2.95	210.2	2.955	205.98	8.013	208.16
2.954	209.79	2.96	206.01	8.017	207.33
2.962	207.66	2.967	206.98	8.022	207.3
2.965	207.91	2.97	207.48	8.027	206.87
2.969	209.22	2.976	207.12	8.033	205.95
2.975	210	2.98	206.45	8.037	204.66
2.981	209.22	2.987	207.18	8.043	203.29
2.984	209.17	2.99	207.33	8.046	204.9
2.99	209.43	2.996	207.56	8.053	205.04
2.994	208.95	3	206.44	8.057	206.11
3	208.89	3.007	205.7	8.064	205.87
3.005	210.39	3.01	205.88	8.067	206.36
3.01	209.5	3.016	205.41	8.073	206.7
3.014	208.36	3.02	205.63	8.077	207.66
3.019	208.62	3.028	208.73	8.084	206.59
3.026	208.83	3.03	208.66	8.087	204.35
3.03	209.74	3.036	208.05	8.093	208.47
3.034	209.38	3.04	208.41	8.097	208.95
3.039	209.3	3.046	208.75	8.103	209.13
3.045	210.12	3.05	208.53	8.107	209.51
3.049	210.16	3.056	208.86	8.114	206.11
3.055	209.01	3.06	208.76	8.116	207.28
3.06	208.6	3.066	207.74	8.123	207.37
3.063	208.79	3.071	210	8.127	208.19
3.068	209.67	3.075	208.16	8.131	208.39
3.075	209.39	3.08	207.09	8.138	208.8
3.078	208.83	3.086	206.37	8.142	206.87
3.086	209.11	3.091	205.2	8.148	204.97
3.089	208.25	3.096	204.53	8.151	207.37
3.094	207.25	3.1	205.06	8.155	210.29
3.1	208.81	3.105	205.45	8.161	212.5
3.105	208.61	3.111	207.41	8.168	213.78
3.109	207.1	3.115	207.93	8.171	213.6
3.116	208.7	3.122	207.16	8.178	217.14
3.118	208.61	3.125	208.04	8.182	217.17
3.127	210.78	3.13	207.46	8.186	217.06
3.13	210.2	3.135	207.98	8.192	215.8
3.135	209.33	3.141	208.45	8.198	216.41
3.142	208.83	3.145	208.26	8.201	214.8
3.144	209.59	3.152	209.36	8.208	215.57
3.149	210.82	3.155	209	8.211	216.23
3.155	211.68	3.161	206.03	8.219	215.84
3.159	209.9	3.165	205.99	8.222	216.13
3.164	209.87	3.172	205.78	8.229	218.79
3.17	209.42	3.175	206.72	8.232	219.65
3.174	209.9	3.181	206.03	8.238	217.9
3.179	208.95	3.185	207.89	8.241	216.61
3.185	209.07	3.191	208.43	8.249	213.23
3.191	208.38	3.195	207.31	8.253	213.14
3.193	208.55	3.201	207.47	8.256	214.64
3.2	208.92	3.205	207	8.262	212.61
3.204	209.03	3.211	207.61	8.268	212.76
3.211	210.14	3.216	208.21	8.272	211.74
3.214	210.26	3.221	206.95	8.277	212.46
3.22	208.8	3.225	206.61	8.281	214.8
3.224	209.22	3.23	205.08	8.286	217.47
3.231	207.47	3.235	205.02	8.293	221.17
3.234	207.22	3.24	205.98	8.297	221.04
3.239	207.2	3.246	205.67	8.303	220.73
3.243	206.69	3.25	206.98	8.307	221.48
3.252	207.66	3.256	207.58	8.312	223.19
3.255	208.88	3.26	207.3	8.317	223.24
3.259	209.17	3.265	207.38	8.321	222.67
3.264	208.44	3.27	208.39	8.326	220.36
3.272	208.96	3.277	207.85	8.334	220.73
3.274	209.02	3.28	207.87	8.336	220.72
3.28	210.2	3.287	209.03	8.342	218.54
3.284	209.81	3.29	208.38	8.347	218.78
3.292	208.44	3.295	208.78	8.354	215.65
3.294	209.1	3.3	205.4	8.358	213.91
3.301	208.83	3.307	205.88	8.362	215.74
3.304	209.54	3.309	205.93	8.366	215.54
3.312	207.92	3.315	207.58	8.372	213.33
3.314	207.35	3.32	207.76	8.377	215.06
3.319	207.21	3.327	206.87	8.384	216.88
3.325	208.19	3.33	206.61	8.387	218.05
3.33	208.55	3.338	206.86	8.394	218.8
3.336	209	3.341	206.8	8.397	219.33
3.339	209.59	3.346	205.71	8.402	217.71
3.344	209.27	3.35	204.5	8.405	215.7
3.35	210.2	3.357	204.11	8.412	218.83
3.355	210.14	3.36	206.21	8.418	221.69
3.36	209.94	3.366	209.05	8.421	219.91
3.366	209.79	3.37	208.5	8.427	218.06
3.369	210.31	3.376	206.67	8.432	217.8
3.376	209.22	3.38	205.38	8.436	220.26
3.379	210	3.385	204.71	8.442	220.12
3.383	211.36	3.391	206.81	8.448	219.21
3.389	212.78	3.395	207.82	8.452	217.65
3.397	210.65	3.4	208.17	8.458	217.97
3.399	210.15	3.406	208.73	8.462	218.52
3.406	208.13	3.411	207.3	8.468	220.99
3.409	208.27	3.416	208.26	8.472	221.01
3.415	208.4	3.421	208.64	8.476	222.02
3.419	209.02	3.425	208.03	8.482	223.35
3.426	209.61	3.431	207.9	8.487	222.67
3.429	208.81	3.434	208.34	8.491	222.33
3.435	209.85	3.442	207.06	8.499	222.12
3.438	209.53	3.445	207.56	8.502	221.25
3.445	210.45	3.451	207.83	8.507	221.69
3.45	210.59	3.455	207.21	8.512	222.33
3.457	211.04	3.461	207.91	8.519	219.4
3.46	209.38	3.465	207.18	8.522	217.96
3.464	210.66	3.471	206.46	8.528	220.19
3.469	210.63	3.475	206.39	8.53	221.91
3.475	209.64	3.481	207.23	8.537	223.61
3.481	207.66	3.485	208.35	8.543	223.74
3.487	210	3.493	207.91	8.549	223.81
3.489	208.81	3.495	207.86	8.552	221.06
3.494	208.64	3.503	206.11	8.558	217.76
3.5	208.01	3.505	206.05	8.561	215.88
3.504	207.55	3.511	206.31	8.568	215.86
3.511	208.25	3.515	206.82	8.571	217.99
3.514	208.55	3.521	207.95	8.577	218.2
3.521	209.18	3.525	208.59	8.583	219.11
3.524	208.94	3.531	208.14	8.588	219.69
3.531	208.44	3.536	209.25	8.592	221.33
3.533	208.98	3.541	207.36	8.597	222.55
3.541	210.78	3.545	207.24	8.601	222.18
3.544	210.44	3.551	208.79	8.607	219.25
3.549	209.18	3.555	209.36	8.613	217.98
3.554	210.2	3.56	208.19	8.617	218.65
3.562	209.84	3.565	209.55	8.622	219.93
3.563	209.74	3.57	210.43	8.628	220.42
3.57	208.3	3.577	209.88	8.632	221.17
3.575	209.22	3.58	209.6	8.637	224.44
3.582	210.26	3.585	208.49	8.643	222.01
3.585	210.41	3.59	209.17	8.647	220.46
3.592	211.04	3.597	210.83	8.652	218.05
3.594	209.79	3.6	209.12	8.655	217.04
3.6	210.06	3.607	207.57	8.663	216.51
3.605	208.99	3.61	206.8	8.667	215.83
3.61	208.96	3.618	207.81	8.671	215.94
3.614	209.59	3.62	208.13	8.676	216.94
3.62	209.1	3.626	208.5	8.684	217.34
3.625	207.66	3.63	209.23	8.686	217.67
3.629	208.2	3.637	207.01	8.694	218.46
3.633	208.52	3.64	207.81	8.696	219.1
3.64	208.39	3.646	206.97	8.702	219.08
3.645	208.55	3.65	207.42	8.708	218.09
3.649	207.92	3.658	207.86	8.713	217.48
3.654	206.96	3.661	205.04	8.717	219.45
3.659	207.94	3.666	204.3	8.724	222.83
3.665	209.55	3.67	206.54	8.726	222.69
3.669	208.96	3.676	207.61	8.733	221.47
3.675	207.43	3.68	206.49	8.738	221.71
3.679	207.71	3.686	205.56	8.741	222.18
3.685	209.11	3.691	204.33	8.748	221.07
3.689	210.62	3.695	205.54	8.752	218.87
3.696	210.59	3.701	206.59	8.756	218.27
3.699	211.81	3.705	206.97	8.762	218.44
3.703	211.15	3.711	208.25	8.769	222.37
3.709	211.46	3.715	209.44	8.772	222.78
3.716	211.56	3.721	210.94	8.777	221.05
3.719	210.78	3.725	210.05	8.781	220.14
3.727	210	3.731	209.51	8.787	220.03
3.73	209.42	3.735	208.82	8.792	220.96
3.735	209.27	3.741	206.63	8.798	220.6
3.739	208.85	3.745	205.56	8.801	220.89
3.747	208.83	3.752	206.41	8.808	221.79
3.75	210.24	3.755	206.64	8.811	222.26
3.755	209.22	3.76	207.72	8.817	222.44
3.758	210.16	3.765	208.7	8.82	222.57
3.765	210.73	3.772	208.14	8.829	221.58
3.771	211.76	3.775	206.55	8.833	220.32
3.775	211.46	3.781	207.31	8.838	220.44
3.779	211.43	3.786	208.72	8.842	219.5
3.784	210.6	3.792	208.27	8.849	219.63
3.789	210.51	3.795	208.95	8.851	220.44
3.795	210.83	3.802	211.34	8.858	221.29
3.8	211.67	3.806	210.32	8.863	220.75
3.804	209.61	3.811	209.03	8.867	218.55
3.81	209.64	3.816	207.82	8.872	217.95
3.814	210.06	3.823	209.88	8.878	218.1
3.82	211.43	3.826	209.29	8.881	219.13
3.824	210.68	3.831	207.21	8.887	220.83
3.828	209.61	3.835	207.08	8.893	220.37
3.834	209.64	3.841	207.3	8.897	219.51
3.84	209.39	3.845	204.88	8.902	218.19
3.844	209.85	3.852	203.81	8.906	219.08
3.85	210.17	3.856	205.28	8.912	220.4
3.854	209.12	3.86	206.97	8.917	221.72
3.861	210.89	3.865	206.22	8.921	222.42
3.864	210.73	3.87	206.97	8.927	222.01
3.871	210.78	3.876	208.19	8.933	222.83
3.875	210.74	3.88	207.13	8.936	222.04
3.88	211.22	3.886	207.37	8.943	222.17
3.883	211.89	3.89	208.61	8.945	222.8
3.892	210.39	3.896	210.31	8.951	222.44
3.895	210.86	3.9	211.17	8.957	221.24
3.899	210.44	3.906	208.41	8.963	220.24
3.904	209.92	3.911	206.93	8.967	218.73
3.91	209.4	3.917	207.47	8.972	220.32
3.914	208.76	3.92	207.84	8.976	221.03
3.92	209.07	3.926	208.54	8.983	220.89
3.923	209.03	3.931	208.54	8.987	222.27
3.931	208.83	3.937	209.49	8.994	220.1
3.935	207.66	3.94	208.61	8.997	222.16
3.94	207.12	3.946	208.87	9.004	223.25
3.945	207.08	3.95	207.89	9.006	221.8
3.949	209.17	3.957	208.4	9.014	220.86
3.956	209.56	3.96	207.82	9.017	221.48
3.96	210.21	3.967	207.44	9.022	221.28
3.965	208.91	3.97	207.64	9.027	220.35
3.969	207.92	3.976	207.48	9.033	220.21
3.976	208.18	3.981	207.09	9.037	220.65
3.979	208.94	3.986	208.92	9.043	220.54
3.984	208.44	3.99	209.62	9.046	221.93
3.989	208.44	3.995	208.14	9.052	220.99
3.996	207.04	4.001	206.88	9.058	220.52
4	207.09	4.006	206.74	9.061	218.71
4.005	207.84	4.01	207.28	9.068	216.91
4.008	207.97	4.017	206.28	9.072	218.62
4.015	209.3	4.02	207.09	9.077	221.15
4.019	208.64	4.025	207.84	9.082	220.49
4.026	209.48	4.03	208.36	9.086	220.52
4.029	209.14	4.035	209.7	9.092	219.61
4.036	208.76	4.041	208.87	9.098	220.17
4.039	209.59	4.045	210	9.101	221.23
4.046	210.83	4.051	209.31	9.107	222.62
4.049	211.89	4.055	208.87	9.112	221.66
4.056	210.39	4.06	207.58	9.117	220.85
4.06	210.51	4.065	207.99	9.122	221.35
4.066	209	4.072	208.63	9.128	221.07
4.069	209.79	4.075	208.58	9.131	220.36
4.074	210.66	4.08	208.81	9.137	220.68
4.078	210.54	4.085	208.32	9.141	220.5
4.087	209.22	4.091	210.04	9.149	222.08
4.089	207.97	4.095	209.27	9.152	222.79
4.094	209.07	4.102	206.57	9.156	221.08
4.1	210	4.105	206.61	9.162	221.39
4.104	210.52	4.111	207.28	9.169	222.25
4.109	210.16	4.115	208.97	9.171	221.65
4.115	209.17	4.122	208.27	9.178	222.11
4.12	210.06	4.126	208.27	9.183	222.39
4.125	208.1	4.133	209.76	9.187	222.15
4.13	186.8	4.135	210.16	9.192	221.01
4.134	173.56	4.141	208.41	9.198	221.51
4.139	158.07	4.146	207.76	9.202	222.6
4.144	146.48	4.15	209.54	9.207	221.55
4.149	137.35	4.155	208.75	9.213	221.77
4.154	129.01	4.161	208.15	9.217	220.95
4.16	119.57	4.165	209.19	9.222	221.11
4.164	115.4	4.171	208.53	9.229	220.62
4.169	109.65	4.176	207.39	9.233	220.81
4.174	105.4	4.18	205.89	9.236	222
4.181	100.35	4.186	206.67	9.241	221.68
4.184	98.63	4.19	205.89	9.247	220.97
4.192	94.13	4.195	204.75	9.253	221.39
4.194	92.07	4.2	203.96	9.256	221.51
4.2	87.44	4.206	207.69	9.263	217.88
4.203	83.68	4.211	208.54	9.266	218.18
4.212	82.32	4.215	207.6	9.273	218.78
4.215	80.43	4.22	207.28	9.277	218.12
4.221	76.89	4.226	208.45	9.28	217.93
4.225	76.62	4.23	207.79	9.287	218.6
4.23	75.53	4.237	207.64	9.293	221.58
4.234	75.59	4.24	207.67	9.296	221.85
4.239	74.17	4.245	207.25	9.304	222.36
4.244	72.15	4.25	207.78	9.307	223.91
4.25	69.45	4.257	205.78	9.314	221.27
4.255	67.22	4.26	204.2	9.317	220.73
4.26	65.64	4.267	204.64	9.323	219.53
4.264	66.42	4.27	205.59	9.327	221.24
4.27	67.14	4.276	206.73	9.333	222.41
4.275	64.14	4.28	205.82	9.336	221.89
4.28	62.65	4.287	206.04	9.342	222.46
4.284	60.54	4.29	206.63	9.348	222.75
4.289	59.79	4.298	207.86	9.352	220.14
4.296	58.82	4.301	207.6	9.357	219.14
4.299	57.34	4.306	208.19	9.364	220.96
4.305	54.77	4.31	208.14	9.366	221.24
4.31	53.06	4.317	210.15	9.374	220.58
4.313	52.9	4.321	211.36	9.378	219.97
4.318	53.05	4.326	210.58	9.381	218.36
4.325	54.46	4.33	207.85	9.387	217.85
4.328	54.61	4.336	207.74	9.392	216.32
4.335	52.79	4.341	207.95	9.398	218.48
4.339	49.75	4.348	207.71	9.402	218.96
4.346	49.25	4.35	207.22	9.406	220.7
4.349	50.34	4.356	207.07	9.412	220.5
4.356	50.65	4.36	207.85	9.418	220.18
4.359	51.57	4.365	209.48	9.421	220.46
4.365	52.94	4.371	207.65	9.428	219.38
4.369	52.93	4.375	208.13	9.432	220.13
4.377	53.58	4.382	210.16	9.436	221.28
4.38	54.72	4.385	208.76	9.442	220.39
4.385	53.84	4.39	209.1	9.448	221.31
4.389	53.11	4.395	209.35	9.451	221.36
4.395	51.69	4.402	207.51	9.458	219.79
4.399	50.18	4.405	207.55	9.461	220.44
4.406	48.9	4.411	207.81	9.467	222.55
4.409	47.1	4.415	207.64	9.472	224.1
4.414	45.44	4.422	209.64	9.479	222.42
4.42	45.88	4.425	210.31	9.482	221.49
4.425	47.98	4.432	208.02	9.489	223.1
4.429	46.71	4.435	206.16	9.491	223.91
4.435	44.53	4.441	207.13	9.498	223.73
4.441	44.87	4.445	209	9.503	222.42
4.443	45.1	4.453	207.04	9.507	221.74
4.45	43.58	4.455	207.11	9.512	221.77
4.454	42.31	4.461	206.64	9.518	221.35
4.461	40.86	4.468	207.76	9.522	218.49
4.464	39.76	4.471	208.16	9.527	219.15
4.469	39.39	4.475	208.54	9.531	222.56
4.474	38.16	4.481	207.86	9.537	223.5
4.481	39.43	4.485	206.18	9.543	223.2
4.484	40.06	4.491	206.31	9.546	223
4.49	41.93	4.496	206.57	9.552	224.54
4.495	42.06	4.5	206.94	9.557	222.06
4.5	43	4.506	209.81	9.562	222.04
4.505	43.44	4.51	209.02	9.566	222.91
4.51	42.16	4.516	207.98	9.571	222.07
4.514	41.26	4.52	208.51	9.576	221.92
4.522	38.57	4.527	208.38	9.584	224.38
4.524	38.9	4.53	207.47	9.586	225.62
4.529	38.84	4.536	207.29	9.593	226.56
4.534	40.15	4.54	208.53	9.597	225.24
4.542	43.87	4.545	208.31	9.601	226.2
4.544	42.89	4.55	206.86	9.608	224.36
4.55	40.34	4.557	206.34	9.614	221.04
4.554	38.69	4.56	206.55	9.616	221.57
4.56	39.87	4.567	208.5	9.624	219.58
4.563	40.13	4.57	208.13	9.627	218.47
4.569	39.61	4.576	208.26	9.632	219.24
4.575	37.32	4.58	207.77	9.637	220.95
4.579	38	4.587	208.17	9.644	218.41
4.586	38.62	4.59	209.35	9.647	218.24
4.589	37.22	4.597	209.11	9.652	218.92
4.594	37.84	4.6	208.66	9.655	219.2
4.599	37.57	4.606	209.47	9.664	218.36
4.606	37.65	4.61	210.15	9.668	219.02
4.609	39.44	4.616	209.93	9.671	220.32
4.615	41.51	4.62	210.25	9.677	221.08
4.619	42.36	4.626	209.65	9.682	218.28
4.626	41.07	4.63	209.27	9.687	217.95
4.629	40.99	4.636	210.21	9.692	220.11
4.636	41.28	4.64	210.37	9.698	218.86
4.639	40.74	4.648	208.25	9.702	219.31
4.645	40.75	4.65	207.91	9.708	219.6
4.649	39.52	4.656	207.35	9.712	220.58
4.656	40.37	4.661	208.2	9.717	220.99
4.659	39.43	4.665	209.08	9.722	221
4.665	41.49	4.671	209.63	9.729	217.68
4.669	41.83	4.675	209.16	9.731	217.37
4.676	40.38	4.681	206.57	9.738	216.8
4.679	41.62	4.685	206.14	9.741	217.51
4.687	40.4	4.69	207.6	9.749	220
4.688	40.06	4.695	207.34	9.752	220.8
4.695	39.61	4.702	208.48	9.758	221.25
4.7	38.24	4.705	208.53	9.762	221.78
4.707	37.05	4.71	207.93	9.768	222.94
4.71	37.69	4.715	209.34	9.772	223.16
4.714	39.09	4.722	186.88	9.778	220.63
4.719	39.79	4.725	173.54	9.78	219.96
4.725	39.76	4.733	147.05	9.79	222.01
4.73	39.72	4.735	139.03	9.793	222.76
4.735	39.32	4.741	125.69	9.796	222.26
4.74	39.33	4.745	119.88	9.802	222.65
4.745	39.94	4.752	110.57	9.808	223.48
4.75	40.39	4.755	104.79	9.811	223.64
4.754	39.91	4.761	98.29	9.818	220.79
4.76	40.15	4.766	93.78	9.824	221.62
4.764	39.76	4.771	90.89	9.827	221.74
4.77	39.48	4.775	87.11	9.833	220.83
4.774	38.14	4.781	82.02	9.838	223
4.779	35.69	4.786	78.19	9.842	222.82
4.784	35.27	4.79	73.63	9.847	224.17
4.791	35.09	4.795	70.24	9.851	223.54
4.794	33.71	4.8	66.54	9.858	224.06
4.801	36.12	4.806	63.04	9.863	226.57
4.804	35.52	4.81	63.16	9.866	225.9
4.81	35.75	4.817	60.48	9.873	224.09
4.813	35.84	4.82	60.09	9.877	221.43
4.821	36.48	4.825	55.67	9.881	219.58
4.825	36.35	4.83	51.73	9.887	220.75
4.828	36.09	4.837	47.5	9.893	222.15
4.835	36.04	4.84	46.69	9.897	223.07
4.841	33.28	4.846	45.3	9.902	223.42
4.844	33.39	4.85	46.14	9.905	220.34
4.852	31.08	4.857	42.36	9.912	220.35
4.855	32.02	4.86	39.69	9.917	221.32
4.86	32.27	4.867	34.1	9.923	221.9
4.865	33.48	4.87	32.2	9.927	220.86
4.871	32.77	4.876	30.46	9.933	221.9
4.875	33.44	4.88	28.37	9.936	223.16
4.88	34.57	4.887	22.82	9.944	223.82
4.883	34.62	4.89	24.47	9.945	223.4
4.892	33.77	4.896	27.63	9.954	223.48
4.894	32.97	4.9	28.53	9.957	223.89
4.9	32.63	4.908	28.15	9.963	222.93
4.905	35.04	4.911	28.53	9.967	223.98
4.909	37.31	4.916	28.78	9.973	223.63
4.914	37.52	4.92	27.64	9.976	224.31
4.92	37.72	4.925	26.91	9.983	225.32
4.925	37.21	4.931	24.97	9.987	223.71
4.929	37.16	4.935	23.56	9.992	221.5
4.936	38.51	4.941	22.49	9.997	220.92
4.939	38.1	4.946	20.5	10.003	219.54
4.944	38.78	4.951	18.91	10.007	218.74
4.949	38.49	4.955	18.9	10.012	221.15
4.956	39.58	4.96	18.42	10.017	223.13
4.959	41.04	4.965	16.87	10.024	224.14
4.965	40.7	4.971	17.05	10.027	221.72
4.968	39.4	4.975	16.54	10.032	220.22
4.976	38.89	4.981	18.07	10.038	220.73
4.979	37.6	4.985	17.69	10.043	221.71
4.986	38.51	4.992	13.55	10.046	221.67
4.989	37.13	4.995	14.6	10.052	222.57
4.994	36.41	5.002	12.11	10.057	225.93
5	37.92	5.005	11.87	10.062	226.84
5.006	38.19	5.012	12.54	10.067	225.8
5.008	37.66	5.015	14.45	10.072	225.14
5.016	34.18	5.021	12.7	10.077	226.78
5.02	34.74	5.025	13.68	10.082	225.22
5.024	36	5.032	16.75	10.088	224.15
5.029	36.55	5.036	14.91	10.092	223.37
5.037	37.29	5.041	11.93	10.097	222.67
5.039	37.47	5.045	12.29	10.101	222.1
5.045	36.33	5.053	13.03	10.108	223.25
5.049	35.42	5.056	15.17	10.112	223.24
5.054	34.66	5.063	18.32	10.119	224.32
5.06	33.57	5.065	18.26	10.122	223.88
5.065	35.01	5.071	18.19	10.128	223.16
5.069	35.44	5.076	18.1	10.131	222.1
5.074	36.54	5.08	19.75	10.138	221.19
5.078	36.7	5.086	20.35	10.142	220.14
5.085	36.98	5.09	17.09	10.147	218.49
5.09	35.48	5.095	17.05	10.152	218.81
5.094	33.11	5.1	18.03	10.158	218.84
5.1	32.63	5.106	18.08	10.162	220.31
5.104	33.76	5.11	17.44	10.169	218.62
5.11	36.99	5.115	16.17	10.171	219.18
5.114	35.67	5.12	15.78	10.177	220.2
5.12	36.62	5.126	17.83	10.183	222.39
5.124	37.26	5.13	19.09	10.186	223.63
5.13	37.85	5.137	18.1	10.193	222.92
5.134	36.77	5.14	15.87	10.197	223.93
5.14	34.92	5.147	13.44	10.201	224.25
5.144	34.52	5.15	12.16	10.207	224.86
5.151	34.4	5.155	11.21	10.213	225.31
5.154	36.55	5.16	7.81	10.217	225.33
5.159	36.53	5.167	5.5	10.223	223.61
5.164	34.77	5.17	5.46	10.226	223.56
5.171	34.28	5.176	4.68	10.232	223.27
5.173	34.78	5.181	6.01	10.237	222.61
5.179	34.08	5.188	8.46	10.242	221.7
5.184	35	5.19	11.15	10.247	220.62
5.191	35.87	5.198	11.15	10.253	220.04
5.194	35.59	5.201	10.25	10.256	221.14
5.202	34.96	5.206	10.22	10.262	220.81
5.203	35.44	5.211	8.76	10.266	221.85
5.21	33.81	5.216	6.97	10.273	222.42
5.215	35.34	5.22	8.65	10.276	222.65
5.22	35.07	5.226	10.51	10.282	221.75
5.225	35.55	5.231	13.38	10.287	221.33
5.23	36.6	5.235	14.13	10.294	222.44
5.234	36.16	5.241	13.95	10.296	224.34
5.24	34.36	5.246	12.36	10.303	225.51
5.243	32.74	5.251	13.06	10.308	223.89
5.25	33.98	5.256	12.01	10.312	223.52
5.255	34.41	5.26	11.36	10.317	220.96
5.259	34.16	5.265	12.17	10.323	220.63
5.264	32.23	5.271	13.63	10.327	220.38
5.269	31.12	5.275	14.7	10.333	219.13
5.275	29.11	5.281	15.28	10.337	222.05
5.279	26.67	5.285	13.4	10.342	222.46
5.285	26.55	5.29	10.36	10.348	223.37
5.289	28.82	5.295	9.05	10.351	222.01
5.294	27.41	5.301	7.8	10.358	222.79
5.299	27.2	5.305	6.83	10.363	223.25
5.306	25.6	5.311	8.5	10.366	223.48
5.309	23.65	5.315	9.11	10.371	223
5.313	23.39	5.32	10.66	10.378	224.71
5.319	23.57	5.325	10.82	10.381	223.44
5.326	23.61	5.332	8.95	10.388	223.69
5.328	22.7	5.335	8.6	10.391	222.33
5.337	21.18	5.341	6.93	10.397	220.89
5.34	19.53	5.345	5.08	10.402	220.72
5.344	21	5.352	4.96	10.409	220.12
5.35	21.15	5.355	6.08	10.412	222.02
5.357	21.73	5.361	7.44	10.418	223.88
5.359	22.08	5.365	7.25	10.421	222.32
5.365	21.14	5.372	9.61	10.429	223.24
5.369	20.42	5.376	11.46	10.433	222.9
5.375	20.64	5.383	12.41	10.439	223.12
5.38	19.15	5.385	12.11	10.442	224.05
5.386	17.62	5.391	13.51	10.448	223.59
5.39	17.9	5.396	14.49	10.452	222.18
5.395	16.95	5.401	10.37	10.458	220.83
5.399	15.97	5.405	7.87	10.462	220.33
5.405	16.98	5.412	8.04	10.467	220.92
5.41	16.65	5.415	6.73	10.473	220.61
5.414	15.58	5.42	5	10.477	221.71
5.42	15.61	5.426	5.57	10.482	219.91
5.423	15.68	5.43	3.65	10.488	220.6
5.429	16.69	5.436	4.38	10.491	223.69
5.435	16.45	5.44	5.43	10.497	223.13
5.44	17.26	5.446	6.11	10.503	221.68
5.444	15.77	5.45	4.61	10.506	224.04
5.45	15.89	5.455	4.26	10.512	224.47
5.453	13.71	5.46	3.39	10.517	222.44
5.46	13.65	5.467	6.27	10.523	220.3
5.464	14	5.47	7.47	10.527	218.88
5.471	11.4	5.475	7.98	10.53	219.38
5.474	11.63	5.48	8.42	10.536	219.94
5.481	10.5	5.487	10.71	10.543	216.72
5.484	8.93	5.49	10.61	10.546	216.68
5.489	8.03	5.495	7.76	10.552	215.9
5.494	6.59	5.5	6.95	10.557	215.18
5.501	6.99	5.507	6.5	10.564	212.2
5.504	7.05	5.51	7.04	10.567	212.73
5.509	6.52	5.517	9.31	10.573	214.11
5.514	5.53	5.521	8.91	10.577	215.62
5.52	7.48	5.526	7.64	10.584	220.75
5.524	9.11	5.53	7.82	10.586	220.3
5.531	8.21	5.536	9.02	10.592	221.57
5.534	7.57	5.54	10.27	10.597	222.22
5.539	7.56	5.547	11.71	10.602	222.23
5.545	7.18	5.55	11.96	10.607	222.85
5.549	7.67	5.556	12.48	10.613	222.11
5.554	9.18	5.56	11.45	10.616	222.69
5.56	9.42	5.565	9.68	10.623	220.67
5.564	10.32	5.571	8.68	10.627	221.16
5.569	11.71	5.576	9.99	10.631	221.72
5.575	13.15	5.58	14.52	10.637	222.81
5.579	13.9	5.586	17.04	10.643	222.89
5.586	13.67	5.591	17.23	10.647	220.36
5.589	13.39	5.595	17.32	10.652	221.93
5.594	14.56	5.601	16.89	10.656	224.17
5.599	14.83	5.605	17.24	10.662	222.73
5.605	16.73	5.61	18.73	10.668	221.51
5.609	16.17	5.615	18.07	10.672	222.37
5.615	17.8	5.621	17.53	10.678	224
5.618	18.47	5.625	16.53	10.682	223.67
5.625	18.87	5.63	16.29	10.687	222.83
5.629	18.7	5.635	15.36	10.692	222.39
5.636	21.45	5.641	12.87	10.698	221.29
5.639	21.73	5.645	12.63	10.702	221.49
5.645	24.01	5.652	13.98	10.709	221.17
5.649	24.54	5.655	13.71	10.711	220.66
5.657	27.94	5.661	14.25	10.718	220.64
5.659	28.2	5.665	14.41	10.721	219.78
5.667	26.42	5.672	13.7	10.726	222.62
5.67	27.42	5.675	14.58	10.732	223
5.675	28.36	5.682	16.87	10.737	222.29
5.679	27.87	5.685	17.74	10.741	222.36
5.685	28.17	5.692	16.86	10.748	222.5
5.689	26.86	5.695	17.02	10.752	222.07
5.695	28.44	5.701	17.83	10.759	223.23
5.7	27.05	5.705	18.2	10.762	224.4
5.705	24.43	5.711	19.83	10.769	219.53
5.709	23.15	5.716	18.5	10.772	219.7
5.714	23.66	5.721	17.47	10.777	220.26
5.719	23.04	5.725	17.73	10.78	219.14
5.725	23.01	5.731	20.04	10.788	219.99
5.73	23.24	5.736	19.19	10.793	220.31
5.734	22.03	5.741	20.21	10.798	218.9
5.74	21.43	5.746	21.51	10.802	219.83
5.744	20.77	5.751	23.58	10.807	218.38
5.751	20.13	5.755	24.05	10.811	217.83
5.754	21.19	5.76	23.9	10.817	218.76
5.758	22.34	5.766	24.72	10.823	219.74
5.763	21.26	5.77	24.28	10.827	221.14
5.771	19.43	5.776	22.78	10.833	221.3
5.774	18.86	5.78	21.26	10.837	220.81
5.78	18.14	5.786	21.1	10.843	223.25
5.784	16.86	5.79	20.9	10.847	224.33
5.789	15.79	5.795	19.16	10.854	222.74
5.794	14.45	5.8	18.71	10.856	223.31
5.801	13.41	5.807	19.1	10.862	225.98
5.804	13.37	5.81	20.35	10.866	224.49
5.812	13.18	5.817	20.65	10.874	221.83
5.813	12.89	5.82	20.7	10.877	221.73
5.819	10.9	5.827	19.71	10.882	222.66
5.824	9.26	5.83	18.53	10.886	221.94
5.831	7.66	5.836	17.4	10.893	222.06
5.835	9.69	5.84	18.94	10.897	219.87
5.839	11.88	5.847	16.41	10.903	220.28
5.847	13.21	5.85	16.71	10.905	222.05
5.85	12.39	5.856	15.65	10.912	221.34
5.855	12.51	5.86	15.5	10.917	222.25
5.861	13.96	5.867	12.47	10.923	220.74
5.864	14.1	5.871	11.76	10.927	219.76
5.869	14.15	5.876	9.8	10.934	219.45
5.875	15	5.881	10.91	10.936	219.26
5.879	15.42	5.886	10.98	10.943	221.1
5.884	14.99	5.89	10.48	10.946	222.44
5.889	15.88	5.895	12.61	10.952	221.53
5.896	16.61	5.9	13.16	10.958	220.72
5.899	17	5.906	12.44	10.963	220.06
5.905	17.43	5.911	12.55	10.967	220.64
5.909	18.75	5.915	11.95	10.974	221.36
5.916	19.51	5.921	11.61	10.976	220.65
5.919	19.15	5.925	10.33	10.983	219.26
5.925	21.25	5.931	9.67	10.988	219.33
5.929	22.76	5.935	9.55	10.992	219.42
5.936	24.61	5.941	8.21	10.997	218.23
5.938	24.85	5.945	5.25	11.002	219.84
5.946	23.44	5.952	5.33	11.007	221.14
5.95	22.59	5.955	5.64	11.012	220.91
5.955	22.71	5.962	7.2	11.018	221.53
5.96	23.91	5.965	8.16	11.022	222.84
5.966	22.93	5.97	10.41	11.027	222.63
5.969	21.85	5.975	11.03	11.031	223.53
5.975	19.96	5.982	11.77	11.038	223.37
5.98	19.31	5.985	12.37	11.042	221.21
5.987	16.33	5.992	11.79	11.046	221.54
5.989	17.82	5.995	9.57	11.051	221.48
5.995	19.46	6.001	10.24	11.058	222.07
6	21.4	6.005	11.18	11.061	223.12
6.005	22.47	6.013	6.62	11.068	222.96
6.009	22.41	6.015	8.24	11.072	222.48
6.015	21.44	6.021	9.82	11.077	222.24
6.02	19.52	6.025	8.7	11.083	221.96
6.024	19.9	6.031	10.61	11.089	224.87
6.03	19.71	6.036	9.42	11.092	222.45
6.034	20.93	6.041	11.91	11.097	222.14
6.039	22.48	6.045	11.85	11.101	222.13
6.044	20.97	6.051	15.47	11.108	220.28
6.206	22.04	6.056	17.18	11.113	219.84
6.298	22.46	6.06	15.86	11.116	217.2
6.404	22.3	6.066	16.82	11.122	216.24
6.502	22.01	6.071	18.02	11.128	215.88
6.602	22.19	6.076	17.98	11.131	217.48
6.702	22.16	6.08	18.06	11.139	218.39
6.798	21.87	6.086	20.16	11.143	219.66
6.901	21.79	6.09	21.27	11.147	221.44
7.006	21.47	6.096	19.89	11.152	221.18
7.107	21.69	6.1	19.38	11.156	221.46
7.202	21.53	6.106	17.82	11.162	222.19
7.303	21.89	6.111	17.42	11.168	221.2
7.401	21.5	6.116	14.17	11.173	221.82
7.502	21.37	6.12	14.16	11.177	220.38
7.602	21.53	6.127	11.95	11.183	221.21
7.7	21.29	6.13	12.52	11.186	222.23
7.802	21.52	6.135	14.45	11.193	223
7.905	21.72	6.14	13.69	11.195	224.31
7.981	21.13	6.146	15.27	11.203	225.29
7.984	21.11	6.15	15.22	11.207	222.88
7.989	21.2	6.156	16.41	11.212	220.01
7.994	21.08	6.16	18.09	11.217	222.01
7.999	21.18	6.167	16.18	11.223	223.23
8.004	21.18	6.17	15.81	11.226	221.37
8.01	21.38	6.177	17.91	11.233	220.28
8.014	21.25	6.181	17.14	11.237	218.54
8.019	21.14	6.186	16.4	11.244	221.76
8.024	21.24	6.19	17.8	11.247	221.67
8.029	20.85	6.198	17.23	11.254	223.72
8.034	21.18	6.201	16.98	11.256	224.59
8.039	21.53	6.206	17	11.263	224.21
8.045	21.39	6.21	18.93	11.267	222.4
8.048	21.14	6.216	19.38	11.272	220.98
8.054	21.21	6.22	19.85	11.277	220.42
8.059	20.9	6.225	23.27	11.284	221.62
8.064	21.27	6.231	24.18	11.287	222.27
8.069	21.03	6.235	23.05	11.292	221.58
8.075	21.04	6.24	19.53	11.296	220.31
8.078	21.33	6.247	16.86	11.302	221.04
8.085	20.94	6.251	16.1	11.308	221.26
8.09	21.1	6.255	15.5	11.312	220.72
8.094	21.05	6.261	15.79	11.317	220.32
8.1	21.2	6.265	16.89	11.322	218.43
8.106	21.06	6.271	18.8	11.327	218.23
8.109	21.17	6.275	21.09	11.333	218.75
8.115	21.38	6.282	22.21	11.338	218.48
8.119	21.25	6.285	25.08	11.341	217.18
8.125	21.14	6.29	26.42	11.347	215.9
8.13	21.52	6.295	25.13	11.351	214.24
8.134	21.33	6.301	26.2	11.358	214.22
8.14	21.29	6.305	26.13	11.362	215.28
8.147	32.63	6.312	26.38	11.366	215.79
8.149	43.61	6.315	26.11	11.372	216.93
8.155	69.12	6.322	24.99	11.378	223.44
8.159	90.46	6.325	26.19	11.381	224.09
8.164	110.45	6.33	24.41	11.389	221.59
8.17	131.79	6.335	24.82	11.391	222.18
8.173	144.5	6.343	24.82	11.398	223
8.179	159.75	6.345	23.86	11.402	222.77
8.185	173.44	6.351	21.41	11.408	220.64
8.191	186.77	6.356	20.99	11.412	220.59
8.194	190.72	6.361	21.5	11.419	219.1
8.2	198.48	6.365	23.95	11.421	218.72
8.203	200.48	6.371	24.04	11.428	217.38
8.211	203.45	6.376	24.69	11.433	218.19
8.214	205.03	6.38	26.02	11.439	222.73
8.219	206.88	6.385	25.37	11.442	224.42
8.224	208.83	6.39	26.22	11.448	226.75
8.231	210.65	6.396	27.27	11.452	225.36
8.234	210.74	6.4	27.64	11.458	224.11
8.241	210.39	6.405	27.44	11.461	222.19
8.243	211.27	6.41	27.4	11.467	221.98
8.25	210.59	6.416	29.19	11.472	222.19
8.255	208.16	6.42	28.85	11.477	221.3
8.26	208.05	6.426	28.07	11.483	219.49
8.264	207.41	6.43	27.77	11.488	218.38
8.27	208.74	6.436	25.91	11.491	219.04
8.274	208.34	6.44	25.9	11.496	218.71
8.28	208.17	6.446	28.25	11.503	218.65
8.284	209.06	6.45	28.49	11.506	220
8.291	209.22	6.457	27.7	11.512	218.38
8.295	209.07	6.46	27.45	11.517	219.81
8.299	208.8	6.466	28.79	11.524	219.92
8.304	209.66	6.47	28.9	11.527	219.32
8.31	210.24	6.477	31.72	11.534	219.14
8.314	209.35	6.48	33.27	11.537	218.02
8.319	209.06	6.486	32.66	11.543	218.19
8.324	208.14	6.49	32.04	11.546	219.07
8.329	208.08	6.497	32.07	11.554	218.13
8.335	207.62	6.501	31.99	11.558	219.54
8.339	207.66	6.506	31.18	11.564	220.47
8.345	208.87	6.51	29.9	11.567	219.46
8.349	207.87	6.518	29.01	11.573	217.99
8.355	206.04	6.521	28.79	11.576	220.27
8.359	207.38	6.528	27.14	11.584	219.65
8.364	205.69	6.53	28.17	11.587	219.25
8.368	206.23	6.536	29.19	11.592	220.99
8.375	206.8	6.541	28.5	11.597	222.22
8.379	208.83	6.545	27.75	11.602	224.03
8.386	210	6.551	27.97	11.608	222.66
8.389	210.14	6.557	25.84	11.614	223.05
8.395	209.66	6.56	24.25	11.616	222.86
8.399	210.1	6.566	23.84	11.622	219.96
8.405	209.87	6.57	21.89	11.627	217
8.409	208.13	6.576	19.39	11.631	217.86
8.415	207.3	6.58	17.07	11.638	218.75
8.42	206.88	6.586	17.49	11.642	220.71
8.425	207.18	6.591	20.83	11.647	220.58
8.429	207.54	6.595	21.49	11.651	221.38
8.435	207.76	6.6	23.02	11.658	220.88
8.439	208.2	6.605	25.86	11.662	221.64
8.445	208.6	6.611	26.94	11.668	222.47
8.449	208.83	6.615	25.93	11.671	223.19
8.455	208.31	6.62	23.8	11.677	222.01
8.459	207.86	6.625	22.48	11.682	220.95
8.464	208	6.632	20.65	11.689	220.32
8.47	208.56	6.635	20.11	11.692	221.13
8.475	208.5	6.641	20.23	11.698	222.57
8.48	206.88	6.645	21.5	11.701	223.28
8.484	206.23	6.652	19.64	11.708	222.35
8.49	205.58	6.655	18.9	11.711	222.1
8.494	205.61	6.662	18.59	11.719	222.59
8.5	205.44	6.665	17.25	11.723	221.24
8.504	205.91	6.673	17.44	11.729	223.53
8.511	205.79	6.676	17.73	11.732	223.65
8.513	206.49	6.681	17.51	11.738	222.94
8.521	207.86	6.685	17.94	11.741	222.32
8.524	208.39	6.691	20.31	11.748	221.33
8.53	208.61	6.695	20.72	11.752	221.06
8.534	208.54	6.701	20.91	11.756	219.21
8.541	208.35	6.705	20.77	11.762	218.17
8.544	208.92	6.711	20.94	11.768	218.49
8.55	208.44	6.716	20.29	11.772	221.22
8.555	208.57	6.721	20.85	11.776	220.19
8.56	209.34	6.725	23.07	11.782	220.52
8.564	208.81	6.73	24.01	11.787	219.32
8.571	208.05	6.735	23.6	11.793	219.93
8.574	208.15	6.74	24.07	11.796	219.88
8.58	209.07	6.745	25.6	11.802	221.01
8.585	208.6	6.75	26.45	11.806	221.76
8.589	208.13	6.756	29.54	11.811	223.11
8.594	207.88	6.76	30.11	11.816	222.8
8.6	208.55	6.765	33.34	11.822	222.87
8.605	207.94	6.77	32.89	11.827	221.32
8.61	208.09	6.777	31.73	11.834	222.62
8.615	207.78	6.78	32.81	11.835	223.32
8.619	208.76	6.786	33.17	11.842	225.42
8.625	208.75	6.79	33.57	11.847	224.07
8.629	209.46	6.797	31.47	11.854	219.73
8.633	209.38	6.8	31.06	11.857	219.92
8.638	208.74	6.807	30.39	11.863	221.9
8.645	208.51	6.81	30.21	11.866	222.43
8.649	207.77	6.816	29.48	11.874	219.45
8.655	207.52	6.82	31.13	11.877	220.29
8.659	207.3	6.827	29.45	11.882	221.2
8.664	208.68	6.83	28.21	11.887	221.3
8.669	207.66	6.836	25.39	11.893	221.63
8.675	206.73	6.841	25.15	11.897	219.73
8.679	207.3	6.848	30.38	11.904	219.75
8.685	208.18	6.85	30.75	11.905	219.77
8.688	208.53	6.858	29.11	11.912	222.75
8.696	207.66	6.86	28.23	11.918	222.33
8.7	207.94	6.865	28.21	11.921	222.16
8.707	209.22	6.87	30.09	11.927	221.98
8.71	210.33	6.876	33.54	11.932	221.34
8.715	210.68	6.881	34.45	11.939	222.2
8.719	210.29	6.885	32.04	11.942	222.43
8.726	209.22	6.891	28.43	11.946	221.31
8.73	209.27	6.895	25.26	11.952	220.34
8.735	209.7	6.9	27.61	11.958	217.15
8.74	210.31	6.905	28.51	11.961	216.54
8.745	211.22	6.911	25.92	11.968	217.67
8.75	211.17	6.915	23.72	11.972	217.47
8.754	210.54	6.921	21.27	11.976	218.64
8.759	210.56	6.925	23.28	11.982	220.51
8.764	210.78	6.931	22.13	11.987	222.85
8.77	209.37	6.935	23.22	11.991	223.38
8.774	208.44	6.942	27.18	11.998	222.21
8.78	207.35	6.945	28.74	12.002	223.25
8.784	209.33	6.951	28.39	12.007	224.35
8.79	209.83	6.955	27.36	12.012	224.51
8.794	208.26	6.962	27.33	12.019	225.19
8.798	207.74	6.965	28.29	12.022	224.36
8.804	208.29	6.971	28.24	12.028	222.6
8.811	209.14	6.975	25.85	12.031	223.07
8.814	207.77	6.983	26.76	12.038	224.09
8.82	208.44	6.986	24.73	12.043	224.55
8.824	208.49	6.992	22.64	12.046	223.98
8.829	207.83	6.996	22.94	12.052	224.43
8.834	207.3	7.001	22.79	12.057	224.13
8.841	206.75	7.005	21.19	12.061	223.41
8.844	205.96	7.011	21.26	12.068	223.76
8.851	209.38	7.015	20.64	12.073	223.15
8.855	209.22	7.023	19.89	12.077	221.83
8.86	209.78	7.025	20.79	12.083	222.97
8.864	209.59	7.031	20.94	12.087	224.33
8.872	208.7	7.036	19.98	12.092	225.28
8.875	208.15	7.04	20.54	12.097	224.23
8.88	208.39	7.046	19.3	12.103	224.86
8.883	208.73	7.05	18.69	12.106	224.47
8.892	207.66	7.056	18.02	12.113	222.37
8.895	208.57	7.06	21.51	12.116	221.11
8.899	208.6	7.065	21.43	12.123	222.14
8.904	207.71	7.07	20.68	12.127	222.46
8.91	207.83	7.076	19.72	12.132	222.1
8.915	207.07	7.08	20.45	12.136	222.28
8.92	208.7	7.087	18.56	12.142	222.26
8.925	209.61	7.089	18.53	12.147	220.93
8.929	209.33	7.095	18.04	12.153	222.62
8.936	208.13	7.1	19.63	12.155	222.97
8.94	208.81	7.106	23.83	12.164	222.16
8.944	208.6	7.11	25.79	12.167	222.01
8.949	208.08	7.117	28.34	12.171	219.25
8.955	207.84	7.12	27.56	12.177	217.91
8.959	207.48	7.127	26.46	12.184	219.92
8.965	209.42	7.13	25.97	12.186	220.07
8.969	209.74	7.138	23.81	12.192	221.15
8.976	208.53	7.14	22.95	12.196	219.4
8.979	208.83	7.146	22.27	12.202	217.94
8.986	207.33	7.15	23.54	12.208	218.15
8.989	206.79	7.156	25.88	12.213	219.81
8.994	205.32	7.161	25.81	12.217	219.36
9	205.74	7.166	24.85	12.222	220.96
9.006	207.04	7.17	23	12.226	221.92
9.008	206.23	7.176	22.43	12.232	221.69
9.015	206.11	7.181	21.28	12.238	223.08
9.02	207.16	7.185	20.54	12.241	223.15
9.027	208.96	7.191	22.99	12.248	221.93
9.029	208.69	7.195	24.58	12.252	224.21
9.035	208.79	7.201	23.75	12.256	225.65
9.039	208.95	7.205	25.82	12.262	225.18
9.046	207.86	7.211	29.18	12.268	224.1
9.049	207.46	7.215	28.53	12.272	222.95
9.056	207.92	7.221	26.48	12.277	221.62
9.06	210.1	7.225	27.49	12.281	220.87
9.065	209.82	7.233	28.15	12.288	220.95
9.069	208.9	7.235	28.93	12.292	222.26
9.074	210.66	7.24	29.26	12.299	223.88
9.078	209.96	7.245	30.33	12.301	223.9
9.084	209.22	7.251	29.8	12.308	224.85
9.09	209.39	7.255	29.82	12.311	223
9.094	208.94	7.262	28.41	12.319	218.19
9.1	208.4	7.265	26.54	12.32	219.47
9.104	207.44	7.273	26.03	12.329	219.77
9.11	207.45	7.275	25.61	12.332	220.4
9.114	208.39	7.28	25.01	12.338	221.03
9.121	209.38	7.286	25.71	12.342	222.11
9.125	208.54	7.292	25.49	12.348	222.33
9.13	207.74	7.295	25.57	12.351	222.45
9.133	207.87	7.301	26.54	12.358	221.67
9.141	206.77	7.306	26.26	12.363	223.5
9.145	207.34	7.311	27.75	12.367	222.68
9.151	208.05	7.315	25.09	12.372	223.39
9.154	209.56	7.323	24.26	12.378	222.5
9.159	208.72	7.325	24.4	12.382	221.89
9.164	208.44	7.33	25.51	12.387	219.45
9.172	208.18	7.335	28.06	12.392	219.88
9.173	208.15	7.34	28.71	12.397	220.48
9.179	209.86	7.346	28.82	12.402	220.37
9.185	211.19	7.35	28.56	12.406	220.52
9.192	210	7.356	27.81	12.412	222.65
9.194	210.04	7.36	25.7	12.418	222.68
9.202	209.61	7.365	24.19	12.421	222.03
9.203	209.91	7.371	22.58	12.426	220.02
9.21	208.86	7.376	23.7	12.433	215.57
9.215	208.6	7.38	23.1	12.436	217.92
9.219	207.61	7.386	21.48	12.442	219.07
9.225	208.61	7.39	21.36	12.447	217.74
9.23	209.29	7.396	23.64	12.453	216.92
9.235	208.55	7.4	23.55	12.457	217.06
9.24	208.75	7.407	24.25	12.463	220.08
9.244	209.88	7.41	24.54	12.467	221.09
9.25	209.22	7.416	22.18	12.473	221.69
9.255	209.33	7.42	20.95	12.476	221.58
9.259	210	7.427	20.15	12.484	222.2
9.265	209.76	7.431	17.72	12.487	223.27
9.269	209.17	7.438	19.78	12.491	224.21
9.276	209.92	7.44	20.31	12.497	223.43
9.279	210.26	7.446	20.17	12.504	221
9.285	210.94	7.45	19.44	12.506	220.74
9.289	210.78	7.456	18.2	12.514	218
9.295	208.85	7.46	17.19	12.518	218.15
9.298	208.49	7.466	16.97	12.522	217.44
9.306	207.92	7.47	17.09	12.527	218.32
9.309	208.54	7.476	16.28	12.534	218.6
9.313	209.11	7.481	16.31	12.537	218.19
9.319	209.41	7.485	15.31	12.542	218.53
9.326	209.22	7.49	15.81	12.546	218.68
9.329	209.22	7.496	16.03	12.552	217.62
9.336	209.54	7.501	16.11	12.558	216.81
9.339	208.59	7.505	15.94	12.561	217.95
9.345	208.5	7.51	15.76	12.567	218.91
9.35	209.18	7.515	15.46	12.572	219.16
9.355	208.44	7.522	15.43	12.577	220.86
9.359	207.29	7.525	15.56	12.582	222.67
9.364	207	7.53	15.5	12.586	222.74
9.369	209.31	7.535	17.66	12.591	222.35
9.375	209.39	7.541	16.94	12.599	221.33
9.38	208.68	7.545	16.23	12.601	222.71
9.385	207.93	7.551	16.12	12.607	222.48
9.39	207.82	7.555	16.67	12.612	221.93
9.394	208.72	7.56	14.22	12.616	219.72
9.4	207.44	7.565	14.29	12.622	218.36
9.405	208.81	7.572	14.36	12.628	218.92
9.409	207.84	7.575	12.95	12.631	219.6
9.414	208.62	7.58	12.21	12.637	220.81
9.42	209.4	7.585	11.34	12.641	220.95
9.424	209.74	7.592	13.59	12.649	222.99
9.429	210.99	7.595	12.03	12.652	223.81
9.435	209.33	7.601	9.79	12.659	222.36
9.441	208.75	7.606	10.05	12.662	223.17
9.443	208.61	7.613	7.55	12.667	223.91
9.45	208.96	7.615	10	12.671	226.06
9.453	210.1	7.621	12.92	12.678	226.03
9.461	209.74	7.626	12.1	12.683	224
9.464	208.64	7.631	11.09	12.686	223.27
9.471	208.35	7.635	13.36	12.692	222.28
9.474	208.68	7.64	13.42	12.699	221.12
9.48	208.49	7.646	12.4	12.702	222.7
9.484	209.09	7.653	16.39	12.707	221.94
9.491	209.22	7.656	15.62	12.712	222.8
9.493	208.03	7.661	16.04	12.717	222.8
9.502	205.72	7.665	16.45	12.722	221.49
9.505	206.22	7.67	15.35	12.727	222.69
9.51	207.48	7.676	13.68	12.733	220.88
9.514	207.58	7.68	12.26	12.736	218.67
9.52	208.28	7.686	9.27	12.743	218.49
9.524	209.1	7.69	10.46	12.746	219.79
9.53	210.21	7.696	11.29	12.752	221.62
9.535	209.64	7.7	9.83	12.756	223.07
9.539	209.79	7.707	10.96	12.763	219.97
9.545	209.77	7.71	11.05	12.766	220.01
9.549	209.73	7.716	12.43	12.772	217.98
9.555	209.28	7.72	12.78	12.776	217.13
9.56	208.05	7.727	11.77	12.784	218.57
9.564	208.24	7.73	10.05	12.787	218.25
9.569	209.22	7.737	8.95	12.794	220.84
9.575	209.01	7.74	8	12.796	222.6
9.579	210.21	7.746	7.85	12.803	222.06
9.586	210.94	7.75	8.32	12.807	223.09
9.589	209.48	7.758	9.53	12.813	220.7
9.594	208.69	7.76	9.8	12.817	220.89
9.599	208.86	7.766	9.95	12.823	222.87
9.606	209.56	7.771	9.9	12.827	222.62
9.609	209.91	7.775	9.6	12.833	222.43
9.616	208.13	7.78	10.32	12.836	222.33
9.618	208.9	7.787	14.07	12.844	220.53
9.625	208.44	7.79	12.84	12.847	220.31
9.63	208.94	7.796	12.82	12.852	219.46
9.636	208.45	7.801	13.85	12.857	219.76
9.639	208.77	7.806	13.69	12.861	220.69
9.646	209.61	7.811	13.99	12.866	222.19
9.649	208.3	7.816	13.74	12.872	220.43
9.655	208.05	7.821	12.23	12.878	220.61
9.659	208.29	7.826	14.54	12.881	221.23
9.664	209.64	7.83	15.04	12.887	222.7
9.67	210.48	7.835	14.73	12.891	223.11
9.675	210.05	7.841	14.94	12.898	225.31
9.679	210.23	7.845	14.41	12.902	224.52
9.685	210.85	7.852	16.86	12.905	223.91
9.69	210.37	7.855	16.96	12.912	224.08
9.694	211.04	7.86	20.77	12.919	219.47
9.7	210.56	7.865	20.7	12.921	219.28
9.704	210.47	7.872	18.25	12.929	217.36
9.71	209.38	7.875	16.55	12.932	218.16
9.714	208.67	7.88	17.64	12.937	217.92
9.719	209.16	7.885	17.65	12.942	217.25
9.724	209.76	7.892	18.22	12.948	215.76
9.73	209.5	7.896	17.22	12.951	217.51
9.734	209.17	7.902	16.35	12.959	217.19
9.741	209.31	7.905	17.56	12.961	215.32
9.743	208.89	7.911	15.87	12.967	215.08
9.751	208.11	7.915	13.08	12.973	218.38
9.755	208.67	7.921	10.82	12.977	218.02
9.759	208.92	7.926	12.03	12.982	219.13
9.764	210.1	7.931	11.05	12.987	218.83
9.771	209.07	7.935	10.81	12.991	218.32
9.774	208.53	7.94	13.03	12.998	218.66
9.781	207.28	7.946	14.66	13.003	217.99
9.784	207.75	7.951	13.56	13.006	218.95
9.79	208.75	7.955	15.86	13.012	219.87
9.794	209.75	7.961	17.47	13.017	219.15
9.801	209.61	7.966	17.18	13.022	218.19
9.804	209.34	7.97	18.47	13.027	220.19
9.811	210	7.976	21.6	13.031	221.21
9.813	209.5	7.98	21.56	13.037	221.08
9.82	208.5	7.986	20.16	13.043	219.71
9.825	207.92	7.99	19.71	13.046	220.25
9.832	209.22	7.995	20.64	13.051	221.13
9.835	208.91	8	20.58	13.056	221
9.839	207.82	8.007	19.51	13.064	220.67
9.844	206.69	8.01	20.14	13.067	220.52
9.85	206.42	8.016	23.07	13.071	222.35
9.855	206.44	8.02	22.48	13.076	224.14
9.859	207.46	8.027	22.51	13.083	224.69
9.865	207.9	8.03	22.64	13.086	224.54
9.869	209.67	8.037	22.56	13.094	225.38
9.875	208.72	8.04	21.93	13.097	226.73
9.879	208.26	8.046	18.94	13.101	224.54
9.886	206.18	8.051	19.15	13.107	223.77
9.888	206.72	8.058	20.37	13.114	223.36
9.894	207.4	8.06	19.53	13.116	224.65
9.899	207.83	8.067	21.31	13.123	224.11
9.905	207.9	8.07	21.17	13.127	224.13
9.91	209.38	8.076	22.83	13.133	223.83
9.914	209.55	8.08	22.4	13.137	223.45
9.919	209.42	8.086	20.42	13.143	222.42
9.925	208.07	8.091	18.61	13.147	220.83
9.929	206.54	8.096	16.88	13.152	221.85
9.936	204.88	8.1	18.5	13.155	221.69
9.939	206	8.106	18.42	13.162	223.12
9.944	207.71	8.111	20.48	13.168	223.74
9.95	208.16	8.115	21.28	13.172	224.74
9.956	209.53	8.121	23.83	13.177	225.07
9.96	208.13	8.125	22.03	13.182	223.02
9.965	207.86	8.13	20.03	13.187	220.96
9.969	209.43	8.135	19.8	13.192	221.33
9.975	209.69	8.141	20.68	13.198	221.58
9.981	209.13	8.145	19.42	13.201	222.46
9.985	210.34	8.151	18.21	13.209	221.51
9.99	210.78	8.155	18	13.211	220.53
9.995	209.87	8.161	19.73	13.217	221.26
10	210.21	8.165	17.64	13.221	220.84
10.004	210.63	8.172	18.77	13.229	217.46
10.008	211.01	8.175	18.71	13.232	219.72
10.014	210.94	8.182	20.37	13.238	221.73
10.02	209.89	8.185	19.88	13.241	220.98
10.024	209.61	8.191	17.83	13.249	220.45
10.03	210.07	8.195	19.99	13.252	219.99
10.034	209.8	8.202	21.74	13.259	215.66
10.039	209.09	8.205	21.87	13.262	216.2
10.044	208.9	8.211	22.35	13.268	219.93
10.051	210.52	8.216	22.07	13.272	219.34
10.054	209.95	8.222	19.43	13.277	219.21
10.059	210.24	8.225	20.56	13.28	221.35
10.064	210.28	8.231	21.92	13.288	223.1
10.071	210.9	8.235	21.73	13.293	223.46
10.075	211.51	8.24	19.87	13.297	222.98
10.082	209.07	8.246	17.53	13.301	222.74
10.084	208.77	8.251	18.17	13.308	221.24
10.09	208.44	8.256	19.97	13.311	219.07
10.094	207.66	8.26	18.83	13.317	219.13
10.102	210	8.265	18.77	13.322	222.04
10.105	208.24	8.271	20.76	13.327	223.24
10.112	208.83	8.275	20.56	13.333	222.47
10.114	208.27	8.28	21.24	13.337	223.9
10.12	207.27	8.286	21.36	13.342	223.49
10.125	207.58	8.29	22.83	13.347	223.3
10.13	207.5	8.295	27.56	13.351	223.95
10.134	207.97	8.3	28.48	13.356	223.2
10.14	208.44	8.307	31.67	13.362	227.44
10.145	209.14	8.309	33.04	13.366	225.54
10.149	208.5	8.316	32.56	13.372	223.73
10.155	209.18	8.32	32.2	13.377	222.42
10.159	207.82	8.326	31.93	13.383	224.32
10.165	207.5	8.33	31.87	13.387	225.49
10.17	207.48	8.337	33.92	13.394	226.12
10.174	207.58	8.34	34.72	13.397	224.95
10.179	207.6	8.346	33.93	13.402	224.28
10.186	208.12	8.35	32.47	13.405	222.78
10.189	209.22	8.358	31.61	13.413	224.19
10.195	208.76	8.36	31.2	13.418	222.41
10.199	208.22	8.368	29.12	13.423	221.56
10.203	207.91	8.37	27.05	13.427	223.47
10.209	208.34	8.376	25.37	13.433	224.42
10.216	209.34	8.38	23.86	13.436	225.01
10.219	209.82	8.388	23.4	13.443	224.33
10.225	209.81	8.39	23.95	13.447	225.79
10.23	208.76	8.395	23.79	13.452	225.06
10.236	208.13	8.4	23.77	13.457	224.51
10.239	209.27	8.406	23.31	13.462	224.71
10.247	210.52	8.411	20.25	13.467	224.66
10.25	210.95	8.415	19.85	13.472	224.73
10.255	210.83	8.421	18.77	13.477	222.14
10.258	209.55	8.426	18.4	13.482	222.92
10.267	209.22	8.431	17.32	13.487	223.53
10.271	208.83	8.435	16.87	13.491	225.83
10.275	207.36	8.441	16.84	13.498	225.94
10.279	208.75	8.445	15.28	13.502	224.65
10.287	208.84	8.451	15.05	13.507	224.33
10.289	208.93	8.455	13.22	13.511	223.34
10.295	209.11	8.46	13.57	13.517	222.49
10.301	208.26	8.465	12.93	13.522	222.93
10.304	208.8	8.472	17.46	13.529	223.46
10.309	208.34	8.475	18.27	13.53	222.99
10.315	206.82	8.482	18.32	13.537	220.23
10.319	206.99	8.485	17.92	13.543	218.19
10.324	208.02	8.491	17.26	13.548	220.58
10.331	207.42	8.495	17.55	13.551	221.69
10.334	207.31	8.502	14.86	13.559	222.33
10.34	206.31	8.505	15.17	13.561	222.08
10.344	206.57	8.511	17.14	13.567	221.95
10.351	207.82	8.515	15.6	13.572	222.76
10.354	208.5	8.521	15.88	13.579	222.83
10.359	208.4	8.525	17.6	13.582	222.64
10.363	207.35	8.531	18.43	13.588	222.23
10.37	209.66	8.536	16.71	13.592	221.76
10.374	209.44	8.541	19.55	13.598	221.85
10.381	208.67	8.545	21.54	13.601	222.39
10.383	209.14	8.551	22.73	13.608	220.93
10.39	209.08	8.556	24.57	13.613	220.38
10.395	209.17	8.56	25.15	13.616	220.95
10.401	209.32	8.565	24.61	13.622	220.78
10.404	207.78	8.57	26.03	13.628	219.27
10.411	208.7	8.576	28.75	13.632	218.22
10.414	208.85	8.58	28.7	13.637	217.48
10.421	207.21	8.588	28.9	13.644	217.36
10.424	208.69	8.59	28.87	13.647	217.74
10.432	210.78	8.596	28.77	13.652	218.86
10.435	210.04	8.599	27.86	13.656	219.21
10.44	210.18	8.606	26.45	13.663	218.36
10.444	210	8.61	30.03	13.667	217.54
10.451	209.22	8.617	33.48	13.671	217.55
10.453	208.67	8.62	34.72	13.676	216.51
10.46	208.23	8.626	35.62	13.683	216.61
10.465	209.04	8.63	34.43	13.686	217.44
10.469	208.94	8.637	34.95	13.694	216.21
10.474	208.93	8.64	33.19	13.695	215.54
10.479	207.79	8.646	32.2	13.702	216.66
10.485	207.39	8.65	31.36	13.707	215.49
10.49	208.08	8.658	31.78	13.713	215.7
10.494	208.16	8.661	30.35	13.717	216.03
10.499	206.81	8.668	28.07	13.723	214.64
10.505	206.84	8.67	29.38	13.726	213.69
10.509	207.9	8.676	30.3	13.734	215.6
10.515	208.99	8.681	28.14	13.738	216.12
10.519	208.18	8.686	23.88	13.744	216.36
10.524	209.38	8.69	22.6	13.747	217.2
10.528	209.51	8.696	20.74	13.753	217.77
10.536	208.56	8.701	20.15	13.756	218.94
10.539	207.71	8.705	20.74	13.762	218.26
10.546	207.66	8.711	19.05	13.768	217.9
10.548	207.8	8.715	18.53	13.772	219.63
10.554	207.66	8.721	20.18	13.777	218.77
10.56	207.71	8.725	21.11	13.781	217.88
10.566	208.22	8.731	21.07	13.787	219.66
10.569	208.13	8.735	21.67	13.792	219.08
10.574	208.05	8.741	18.96	13.796	218.86
10.578	207.66	8.745	19.95	13.801	220.26
10.586	207.66	8.752	16.37	13.808	221.56
10.589	207.4	8.755	14.86	13.811	221.26
10.595	207.66	8.76	16.45	13.818	221.91
10.6	207.38	8.765	18.4	13.82	221.45
10.605	207.09	8.772	20.55	13.827	219.91
10.609	207.88	8.775	22.67	13.832	219.85
10.617	208.44	8.78	25.02	13.838	223.2
10.619	207.23	8.785	23.58	13.842	225.08
10.625	206.75	8.792	22.25	13.848	226.77
10.63	206.94	8.795	19.76	13.851	225.29
10.634	207.25	8.802	19.77	13.858	222.52
10.639	208.13	8.806	19.63	13.862	220.89
10.644	209.83	8.813	20.61	13.866	221.35
10.65	210	8.815	19.4	13.872	221.26
10.654	209.78	8.821	19.02	13.879	224.03
10.659	207.66	8.826	19.14	13.881	225.16
10.664	207.54	8.833	22.24	13.889	223.99
10.67	207.87	8.835	20.61	13.892	221.5
10.674	207.73	8.841	20.09	13.897	220
10.68	208.62	8.846	21.41	13.902	218.18
10.684	208.7	8.851	21.34	13.907	216
10.689	208.1	8.856	20.67	13.912	215.97
10.694	208.38	8.86	22.09	13.918	217
10.701	208.78	8.865	22.73	13.921	219.99
10.703	208.9	8.87	23.46	13.927	221.77
10.711	207.19	8.876	24.11	13.933	222.35
10.715	207.21	8.88	24.83	13.936	220.53
10.719	206.45	8.886	24.66	13.943	218.9
10.725	207.18	8.89	24.86	13.947	218.93
10.732	208.06	8.896	26.75	13.952	218.74
10.734	208.12	8.9	29.99	13.958	219.95
10.742	210	8.906	30.9	13.963	221.04
10.744	210.98	8.91	31	13.969	219.14
10.75	210.62	8.915	28.99	13.972	218.7
10.755	210.7	8.92	27.82	13.976	218.21
10.759	212.22	8.927	23.02	13.982	219.9
10.764	210.78	8.93	22.42	13.987	221.54
10.769	209.76	8.937	23.85	13.993	220.27
10.774	209.58	8.94	24.03	13.996	221.03
10.781	207.67	8.947	29.71	14.002	219.28
10.784	207.56	8.95	29.24	14.006	219.65
10.789	208.38	8.955	28.08	14.013	218.21
10.795	209	8.96	26.15	14.016	218.95
10.799	209.38	8.967	24.2	14.023	218.95
10.804	210.31	8.97	23.9	14.026	219.21
10.809	209.22	8.976	22.62	14.031	223.74
10.815	208.62	8.981	23.08	14.037	226.17
10.819	207.66	8.988	22.36	14.044	225.89
10.824	210.59	8.99	21.93	14.046	228.82
10.829	209.09	8.996	21.62	14.053	228.54
10.835	209.96	9.001	21.76	14.057	227.69
10.839	209.95	9.006	24.68	14.062	223.84
10.846	208.53	9.01	24.16	14.067	222.25
10.849	208.17	9.015	23.48	14.073	221.74
10.855	208.59	9.021	21.65	14.077	222.91
10.859	208.88	9.025	21.49	14.082	223.94
10.865	206.5	9.03	21.21	14.086	223.15
10.868	206.64	9.035	22.36	14.094	214.54
10.877	207.4	9.041	20.37	14.097	198.58
10.88	206.6	9.045	20.37	14.102	170.13
10.884	207.57	9.05	19.31	14.107	152.66
10.889	207.5	9.055	19.83	14.112	139.93
10.897	205.33	9.062	20.35	14.116	126.71
10.899	205.95	9.065	21.56	14.122	119.73
10.905	206.7	9.072	24.52	14.127	109.27
10.909	207.43	9.075	24.83	14.131	100.82
10.914	207.2	9.082	22.27	14.138	91.5
10.92	208.62	9.085	20.96	14.142	87.46
10.925	210.06	9.09	20.54	14.147	80.9
10.929	209.45	9.095	21.15	14.151	75.91
10.935	208.38	9.242	21.63	14.158	69.69
10.938	209.34	9.344	22.29	14.162	67.2
10.944	209.7	9.444	21.62	14.168	64.03
10.95	209.67	9.545	21.39	14.171	63.06
10.954	209.48	9.647	21.74	14.178	62.19
10.961	207.84	9.747	23.21	14.182	61.97
10.964	207.94	9.836	21.79	14.189	58.24
10.969	207.01	9.942	21.67	14.192	55.58
10.974	206.47	10.04	21.76	14.198	51.12
10.981	207.66	10.144	21.84	14.201	47.99
10.984	207.51	10.247	22.43	14.209	45
10.989	207.83	10.337	21.86	14.211	43.34
10.993	208.49	10.445	21.83	14.219	45.21
11.001	208	10.545	22.02	14.223	46.47
11.005	207.89	10.638	21.93	14.227	47.22
11.011	207.27	10.741	21.92	14.232	45.62
11.014	207.98	10.847	21.91	14.237	45.66
11.02	207.58	10.939	21.56	14.241	45.64
11.024	208.66	11.045	21.62	14.248	46.49
11.031	207.33	11.147	21.56	14.252	45.85
11.035	207.57	11.244	21.89	14.256	44.71
11.042	205.32	11.346	21.68	14.263	42.37
11.045	207.86	11.447	21.98	14.267	41.24
11.05	207.96	11.544	21.74	14.272	40.58
11.054	208.56	11.644	21.85	14.277	40.73
11.06	206.76	11.743	21.67	14.283	41.52
11.064	207.05	11.832	21.67	14.287	40.07
11.07	207	11.944	21.89	14.293	41.22
11.075	206.65	12.039	21.61	14.296	41.29
11.08	206.83	12.14	21.37	14.302	40.03
11.085	206.56	12.245	21.32	14.306	39.2
11.089	207.5	12.315	21.08	14.314	37.98
11.094	208.18	12.32	21.4	14.317	37.23
11.1	208.08	12.326	21.16	14.323	37.87
11.106	208.18	12.33	21.16	14.327	38.09
11.109	208.81	12.336	21.21	14.333	38.52
11.114	209.06	12.34	21.79	14.335	40.26
11.119	208.16	12.346	21.2	14.343	41.83
11.125	207.66	12.35	21.42	14.347	42.46
11.129	208.44	12.356	20.85	14.354	40.41
11.135	207.66	12.36	21.44	14.357	39.96
11.139	206.82	12.366	21.61	14.363	43.22
11.146	208.88	12.371	21.29	14.366	43.92
11.149	208.24	12.376	20.71	14.374	41.68
11.155	208.08	12.38	21.11	14.377	42.54
11.159	208.4	12.386	21.13	14.381	40.4
11.166	205.64	12.39	21.18	14.387	38.13
11.169	206.15	12.396	21.04	14.394	38.89
11.175	206.21	12.4	21.18	14.397	40.51
11.179	206.78	12.406	20.91	14.402	39.34
11.186	206.47	12.41	20.97	14.405	36.93
11.188	207.29	12.416	21.3	14.412	34.4
11.197	206.88	12.42	21.19	14.418	33.79
11.2	207.35	12.426	21.54	14.421	34.39
11.206	207.42	12.431	21.45	14.428	34.35
11.21	208.32	12.435	21.55	14.432	33.61
11.217	210	12.44	21.52	14.436	32.87
11.219	209.18	12.445	21.4	14.442	31.4
11.227	207.66	12.452	21.69	14.448	31.16
11.23	208.3	12.455	21.2	14.452	30.68
11.234	209.07	12.461	21.23	14.459	31.59
11.239	208.03	12.464	21.11	14.46	32.13
11.244	207.72	12.47	21.63	14.467	35.8
11.25	207.98	12.474	21.74	14.472	36.88
11.254	207.96	12.482	21.41	14.478	36.56
11.258	208.44	12.485	21.49	14.482	34.68
11.265	208.44	12.49	21.59	14.489	31.11
11.271	209.5	12.495	21.5	14.491	32.38
11.274	209.78	12.502	42.95	14.497	32.34
11.281	207.04	12.505	64.28	14.502	30.47
11.284	206.57	12.513	112.81	14.508	29.02
11.292	207.83	12.515	129.4	14.511	28.53
11.293	207.61	12.523	167.04	14.519	29.62
11.299	207.04	12.525	177.81	14.522	30.78
11.304	205.68	12.531	190.23	14.527	32.59
11.311	207.79	12.536	198.44	14.53	35.25
11.313	207.89	12.541	204.44	14.537	36.25
11.319	207.32	12.545	207.72	14.543	37.69
11.325	205.84	12.55	209.12	14.546	39.4
11.33	207	12.556	210.09	14.552	39.8
11.335	208.13	12.56	209.96	14.557	40.78
11.341	208.05	12.566	210.17	14.562	41.28
11.344	208.24	12.571	209.22	14.567	41.28
11.35	207.81	12.576	207.24	14.571	39.58
11.355	207.7	12.58	207.81	14.577	36.51
11.361	208.83	12.586	208.35	14.583	35.95
11.364	208.55	12.59	207.76	14.587	35.48
11.37	208.56	12.595	207.33	14.592	34.16
11.375	207.88	12.6	208.06	14.597	35.34
11.379	209.76	12.606	208.18	14.602	34.62
11.384	208.96	12.61	208.52	14.606	32.63
11.39	207.99	12.616	208.2	14.613	32.13
11.395	208.17	12.62	206.63	14.616	32.64
11.399	209.4	12.626	207.24	14.624	31.49
11.405	209	12.63	209.69	14.627	29.98
11.409	209.69	12.637	209.2	14.631	28.54
11.415	208.98	12.64	208.26	14.637	27.1
11.419	207.27	12.646	210.06	14.644	28.49
11.425	207.42	12.65	209.44	14.647	26.04
11.429	207.4	12.655	208.81	14.652	26.34
11.435	207.16	12.661	208.1	14.655	25.93
11.439	207.61	12.667	208.17	14.662	26.47
11.445	207.57	12.67	208.61	14.668	26.91
11.449	207.96	12.676	208.51	14.673	28.4
11.454	207.94	12.681	208.46	14.677	27.75
11.459	207.25	12.688	207.58	14.683	27.95
11.466	207.82	12.69	206.87	14.686	27.39
11.469	208.49	12.696	206.95	14.692	27.17
11.476	207.56	12.701	206.39	14.697	27.23
11.48	207.94	12.706	206.81	14.702	27.06
11.485	207.99	12.71	205.59	14.708	27.21
11.489	208.32	12.716	206.54	14.713	26.63
11.497	209.22	12.72	206.11	14.717	25.31
11.5	208.07	12.725	205.41	14.722	23.07
11.506	207.04	12.731	207.01	14.726	24.27
11.509	207.17	12.735	207.85	14.732	25.12
11.515	207.33	12.741	208.46	14.738	26.08
11.519	208.7	12.745	208.21	14.741	27.93
11.525	207.05	12.75	206.71	14.747	29.14
11.53	205.11	12.755	205.83	14.752	29.65
11.534	204.91	12.76	206.65	14.757	27.26
11.539	206.1	12.765	206.17	14.761	27.51
11.545	207.72	12.772	205.6	14.767	27.54
11.55	207.87	12.775	206.25	14.772	28.26
11.554	207.33	12.78	207.02	14.777	29.68
11.56	207.11	12.785	206.28	14.781	29.66
11.565	207.82	12.791	204.88	14.788	28.78
11.569	208.17	12.795	203.94	14.792	29.52
11.574	207.49	12.802	204.23	14.796	29.72
11.581	206.88	12.806	205.1	14.802	31.14
11.584	207.09	12.81	206.64	14.809	33.24
11.59	207.4	12.815	206.9	14.811	32.41
11.594	208.03	12.822	204.58	14.819	29.13
11.599	207.27	12.825	206.48	14.821	28.96
11.604	206.04	12.833	208.53	14.827	28.19
11.611	206.66	12.835	209.68	14.833	25.86
11.614	207.34	12.841	209.35	14.838	25.01
11.619	207.66	12.846	208.35	14.842	24.73
11.625	208.21	12.851	207.35	14.847	25.32
11.631	209.07	12.856	208.12	14.851	23.23
11.633	207.84	12.861	207.32	14.859	21.98
11.642	208.44	12.865	206.2	14.863	22.16
11.645	208.36	12.872	205.96	14.866	21.4
11.65	207.96	12.875	207.33	14.873	23.36
11.654	207.46	12.881	206.67	14.878	23.72
11.66	206.41	12.886	206.92	14.881	23.15
11.664	206.73	12.89	207.14	14.887	22.9
11.671	207.48	12.896	206.79	14.893	19.4
11.674	207.25	12.9	207.38	14.897	17.29
11.679	207.72	12.906	207.51	14.902	14.09
11.685	207.45	12.91	207.48	14.906	10.92
11.69	208.16	12.916	207.9	14.913	8.78
11.694	209.04	12.92	209.06	14.916	8.52
11.699	207.83	12.926	209.63	14.921	6.01
11.703	207.98	12.93	207.5	14.926	6.21
11.71	207.51	12.936	206.86	14.933	7.75
11.714	207.4	12.94	206.03	14.936	9.01
11.719	206.94	12.945	206.5	14.944	12.67
11.725	206.1	12.95	208.37	14.945	15.43
11.729	206.64	12.956	208.73	14.954	16.94
11.735	204.4	12.96	207.94	14.958	15.9
11.738	204.49	12.967	207.76	14.963	13.98
11.746	206.45	12.97	208.75	14.967	13.51
11.75	207.04	12.975	208.6	14.974	16.37
11.755	206.93	12.98	207.8	14.976	17.89
11.758	206.26	12.987	206.55	14.983	20.06
11.766	207.75	12.99	206.8	14.988	20.78
11.769	207.66	12.996	206.41	14.994	18.94
11.776	206.23	13.001	206.19	14.997	20.27
11.779	206.01	13.006	207.67	15.003	21.93
11.784	205.24	13.01	209.41	15.007	23.17
11.789	204.25	13.016	209.84	15.012	24.56
11.795	206.66	13.021	208.78	15.018	26.22
11.799	207.14	13.025	208.43	15.022	26.62
11.805	206.04	13.03	206.31	15.027	26.2
11.81	205.98	13.036	206.04	15.032	26.5
11.817	206.1	13.041	205.34	15.037	25.6
11.819	207.08	13.046	207.1	15.042	25.5
11.824	207.89	13.051	207.9	15.046	27.96
[truncated: 22,284 more rows]

## Sheet: Fig2S1
Protein	Rsa4-GFP		Ytm1-GFP		None
Bridge	55 nt	70 nt	55 nt	70 nt	55 nt	70 nt
# Active	38	28	30	24	0	0
#Total Molecules	91	67	78	86	13	22
Fraction	0.42	0.42	0.38	0.28	0	0
Error	0.08	0.1	0.08	0.06	0	0
