# Supplementary material for: The MIDAS domain of AAA mechanoenzyme Mdn1 forms catch bonds with two different substrates
Source: eLife. 2022 Feb 11;11:e73534. doi: 10.7554/eLife.73534 (PMC8837202; doi:10.7554/eLife.73534)
Supplement: Figure 3—source data 1. [file elife-73534-fig3-data1.xlsx]

## Sheet: Fig3A
MIDAS + Rsa4-GFP		MIDAS-Y4666R + Rsa4-GFP
Ftot = 6 pN		Ftot = 6 pN
Lifetime, s	Cumulative density	Lifetime, s	Cumulative density
0.013	0	0.019	0
0.013	0.0175439	0.019	0.0344828
0.048	0.0350877	0.026	0.0689655
0.076	0.0526316	0.026	0.103448
0.078	0.0701754	0.028	0.137931
0.1	0.0877193	0.029	0.172414
0.106	0.105263	0.03	0.206897
0.121	0.122807	0.031	0.241379
0.125	0.140351	0.031	0.275862
0.126	0.157895	0.033	0.310345
0.13	0.175439	0.034	0.344828
0.193	0.192982	0.036	0.37931
0.204	0.210526	0.037	0.448276
0.21	0.22807	0.04	0.482759
0.216	0.245614	0.041	0.517241
0.24	0.263158	0.043	0.551724
0.256	0.280702	0.044	0.586207
0.27	0.298246	0.049	0.62069
0.271	0.315789	0.088	0.655172
0.283	0.333333	0.095	0.689655
0.291	0.350877	0.097	0.724138
0.291	0.368421	0.106	0.758621
0.36	0.385965	0.107	0.793103
0.418	0.403509	0.119	0.827586
0.428	0.421053	0.125	0.862069
0.443	0.438596	0.167	0.896552
0.454	0.45614	0.223	0.931034
0.482	0.473684	0.283	0.965517
0.498	0.491228	0.44	0.99
0.528	0.508772
0.576	0.526316
0.58	0.54386
0.605	0.561404
0.618	0.578947
0.637	0.596491
0.647	0.614035
0.666	0.631579
0.685	0.649123
0.693	0.666667
0.76	0.684211
0.87	0.701754
0.895	0.719298
1.055	0.736842
1.073	0.754386
1.216	0.77193
1.231	0.789474
1.24	0.807018
1.326	0.824561
1.415	0.842105
1.451	0.859649
1.552	0.877193
1.576	0.894737
1.592	0.912281
1.662	0.929825
1.67	0.947368
1.888	0.964912
2.713	0.982456
3.207	0.99

## Sheet: Fig3BC, 3S2 3S3
Rsa4-GFP
55 nt bridge construct																70 nt bridge construct
Ftot = 4 pN			Ftot = 6 pN			Ftot = 8 pN			Ftot = 10 pN			F tot = 12 pN				Ftot = 4 pN			Ftot = 6 pN			Ftot = 8 pN			Ftot = 10 pN			F to t= 12 pN
Lifetime, s	Cumulative density	Residuals	Lifetime, s	Cumulative density	Residuals	Lifetime, s	Cumulative density	Residuals	Lifetime, s	Cumulative density	Residuals	Lifetime, s	Cumulative density	Residuals		Lifetime, s	Cumulative density		Lifetime, s	Cumulative density	Residuals	Lifetime, s	Cumulative density	Residuals	Lifetime, s	Cumulative density	Residuals	Lifetime, s	Cumulative density	Residuals
0.071	0.0384615	0.00517794	0.013	0.0175439	-0.02768	0.035	0.0263158	0.00757962	0.043	0.0263158	0.0137861	0.019	0.0344828	-0.0290944		0.051	0.030303	0.0204368	0.047	0.037037	0.0754542	0.01	0.05	0.0738203	0.019	0.0454545	0.00797605	0.02	0.0909091	0.00261713
0.081	0.0769231	0.00444181	0.048	0.0350877	0.00405331	0.061	0.0526316	0.0128645	0.046	0.0526316	-0.00730688	0.025	0.103448	-0.0529409		0.054	0.0606061	0.000873101	0.111	0.0740741	0.111585	0.047	0.1	0.0650693	0.02	0.0909091	-0.0296067	0.03	0.181818	0.108665
0.09	0.115385	-0.00134092	0.076	0.0526316	0.0241947	0.078	0.0789474	0.00664966	0.065	0.0789474	-0.00119823	0.032	0.137931	-0.037365		0.062	0.0909091	-0.00138188	0.112	0.111111	0.0756424	0.082	0.15	0.0522997	0.031	0.136364	0.00732532	0.03	0.272727	0.017756
0.095	0.153846	-0.0221525	0.078	0.0701754	0.0092854	0.093	0.105263	-0.00228934	0.065	0.105263	-0.027514	0.054	0.172414	0.0689351		0.073	0.121212	0.00551762	0.117	0.148148	0.0440536	0.084	0.2	0.00437634	0.04	0.181818	0.0238703	0.031	0.363636	-0.0559826
0.105	0.192308	-0.0263621	0.1	0.0877193	0.02023	0.126	0.131579	0.00847025	0.084	0.131579	-0.0225066	0.055	0.206897	0.0402997		0.074	0.151515	-0.0214797	0.126	0.185185	0.0167315	0.106	0.25	-0.0231349	0.044	0.227273	0.00451033	0.035	0.454545	-0.0822659
0.106	0.230769	-0.0614737	0.106	0.105263	0.0103016	0.179	0.157895	0.0385198	0.105	0.157895	-0.0154383	0.061	0.241379	0.0399667		0.092	0.181818	0.0056256	0.136	0.222222	-0.00964815	0.135	0.3	-0.0444588	0.045	0.272727	-0.0345556	0.046	0.545455	-0.0248947
0.168	0.269231	0.0835086	0.121	0.122807	0.011513	0.191	0.184211	0.0244441	0.112	0.184211	-0.0309064	0.064	0.275862	0.0219735		0.095	0.212121	-0.0154847	0.177	0.259259	-0.00445734	0.159	0.35	-0.071533	0.065	0.318182	0.0371707	0.059	0.636364	0.0149588
0.171	0.307692	0.0528149	0.125	0.140351	-0.00109694	0.208	0.210526	0.01515	0.145	0.210526	-0.00790258	0.074	0.310345	0.0397715		0.115	0.242424	0.0128957	0.194	0.296296	-0.0246565	0.178	0.4	-0.103885	0.072	0.363636	0.0283195	0.069	0.727273	-0.000190202
0.181	0.346154	0.0395794	0.126	0.157895	-0.0174117	0.242	0.236842	0.021787	0.157	0.236842	-0.0170053	0.08	0.344828	0.0347698		0.119	0.272727	-0.00619536	0.258	0.333333	-0.00164589	0.312	0.45	-0.0410921	0.088	0.409091	0.0589145	0.091	0.818182	0.0226092
0.189	0.384615	0.0205802	0.13	0.175439	-0.0300568	0.246	0.263158	-0.000745397	0.199	0.263158	0.0140508	0.082	0.37931	0.00981377		0.14	0.30303	0.0196531	0.259	0.37037	-0.0377851	0.475	0.5	0.0220374	0.09	0.454545	0.0222715	0.125	0.909091	0.0216889
0.205	0.423077	0.0192131	0.193	0.192982	0.0259733	0.249	0.289474	-0.0242363	0.21	0.289474	0.00205076	0.09	0.413793	0.0119974		0.147	0.333333	0.00709513	0.273	0.407407	-0.062378	0.559	0.55	0.0216012	0.099	0.5	0.014697	0.368	0.99	-0.000179842
0.213	0.461538	-0.00157794	0.204	0.210526	0.0206101	0.256	0.315789	-0.0440027	0.223	0.315789	-0.00771155	0.09	0.448276	-0.0224854		0.16	0.363636	0.00852308	0.276	0.444444	-0.0967788	0.7	0.6	0.0435165	0.105	0.545455	-0.00704046
0.233	0.5	0.00172591	0.21	0.22807	0.00963003	0.265	0.342105	-0.0619835	0.252	0.342105	0.00151926	0.108	0.482759	0.017685		0.161	0.393939	-0.0194033	0.374	0.481481	-0.0532927	0.755	0.65	0.0181756	0.107	0.590909	-0.0448497
0.25	0.538462	-0.00378472	0.216	0.245614	-0.0014061	0.32	0.368421	-0.0393963	0.343	0.368421	0.075318	0.109	0.517241	-0.0129474		0.2	0.424242	0.0362909	0.411	0.518519	-0.0625826	0.761	0.7	-0.0292397	0.117	0.636364	-0.0539359
0.266	0.576923	-0.0132268	0.24	0.263158	0.00653012	0.325	0.394737	-0.0614346	0.344	0.394737	0.050013	0.112	0.551724	-0.0360562		0.205	0.454545	0.0161215	0.459	0.555556	-0.0656201	0.99	0.75	0.00571677	0.127	0.681818	-0.0659358
0.289	0.615385	-0.0131144	0.256	0.280702	0.00549395	0.343	0.421053	-0.072576	0.365	0.421053	0.0445031	0.125	0.586207	-0.0241916		0.224	0.484848	0.0226203	0.464	0.592593	-0.09924	1.065	0.8	-0.0215349	0.144	0.727273	-0.060553
0.29	0.653846	-0.0499785	0.27	0.298246	0.00208794	0.564	0.447368	0.0615378	0.375	0.447368	0.027819	0.149	0.655172	-0.0189292		0.226	0.515152	-0.00396091	0.536	0.62963	-0.0895349	1.666	0.85	0.0487805	0.228	0.772727	0.0620145
0.339	0.692308	-0.0175411	0.271	0.315789	-0.0144569	0.603	0.473684	0.059119	0.386	0.473684	0.0118977	0.154	0.689655	-0.039608		0.242	0.545455	-0.00548401	0.983	0.666667	0.0811676	1.937	0.9	0.0288995	0.232	0.818182	0.021989
0.34	0.730769	-0.0546963	0.283	0.333333	-0.0201226	0.632	0.5	0.0498157	0.436	0.5	0.0302951	0.174	0.724138	-0.0239182		0.26	0.575758	-0.00543004	1.227	0.703704	0.11465	3.117	0.95	0.0347254	0.279	0.863636	0.0284195
0.454	0.769231	0.0260346	0.291	0.350877	-0.0298602	0.669	0.526316	0.0443091	0.447	0.526316	0.0132824	0.185	0.758621	-0.0339417		0.266	0.606061	-0.0260659	1.233	0.740741	0.0790726	3.69	0.99	-0.00723835	0.327	0.909091	0.0186129
0.473	0.807692	0.00264501	0.291	0.368421	-0.047404	0.679	0.552632	0.0234504	0.492	0.552632	0.0231446	0.215	0.793103	-0.0113913		0.27	0.636364	-0.0500454	1.417	0.777778	0.0815223				0.384	0.954545	0.000539565
0.581	0.846154	0.031042	0.36	0.385965	-0.00119691	0.691	0.578947	0.00359169	0.514	0.578947	0.0134669	0.244	0.827586	-0.00199973		0.319	0.666667	-0.010191	1.559	0.814815	0.0689369				2.17	0.99	-1.49633e-08
0.589	0.884615	-0.0035286	0.418	0.403509	0.0301929	0.785	0.605263	0.0245689	0.515	0.605263	-0.0121083	0.276	0.862069	0.00177098		0.326	0.69697	-0.031494	1.695	0.851852	0.0513242
0.6	0.923077	-0.0368406	0.428	0.421053	0.0206835	0.796	0.631579	0.00342489	0.589	0.631579	0.0128042	0.405	0.896552	0.053264		0.335	0.727273	-0.0505712	1.754	0.888889	0.0216704
0.941	0.961538	0.00962233	0.443	0.438596	0.0149782	0.872	0.657895	0.0109206	0.644	0.657895	0.0203378	0.466	0.931034	0.0376624		0.417	0.757576	0.00553795	1.801	0.925926	-0.00989012
1.84	0.99	-0.000773851	0.454	0.45614	0.00595604	0.915	0.684211	0.00232831	0.669	0.684211	0.00832385	0.529	0.965517	0.0152568		0.443	0.787879	-0.00252086	2.178	0.962963	-0.0135433
			0.482	0.473684	0.00950896	1.031	0.710526	0.0192361	0.709	0.710526	0.00358058	0.746	0.99	-0.00358671		0.531	0.818182	0.0280847	3.498	0.99	-0.00857621
			0.498	0.491228	0.0036468	1.062	0.736842	0.00342607	0.722	0.736842	-0.0160553					0.62	0.848485	0.0418232
			0.528	0.508772	0.00729913	1.168	0.763158	0.0100426	0.736	0.763158	-0.0353519					0.721	0.878788	0.0464269
			0.576	0.526316	0.0218347	1.206	0.789474	-0.00551316	0.744	0.789474	-0.0577361					0.939	0.909091	0.0581943
			0.58	0.54386	0.00686616	1.271	0.815789	-0.0145937	0.808	0.815789	-0.0545768					1.061	0.939394	0.0400095
			0.605	0.561404	0.00508862	1.281	0.842105	-0.0383828	0.903	0.842105	-0.0430045					1.076	0.969697	0.0108454
			0.618	0.578947	-0.00447666	1.317	0.868421	-0.0558655	0.904	0.868421	-0.0689552					2.891	0.99	-1.99328e-05
			0.637	0.596491	-0.0106229	1.563	0.894737	-0.0315789	1.131	0.894737	-0.0274454
			0.647	0.614035	-0.0222912	1.582	0.921053	-0.0546091	1.459	0.921053	0.00586087
			0.666	0.631579	-0.0289001	2.84	0.947368	0.025911	1.877	0.947368	0.0184579
			0.685	0.649123	-0.0358019	4.282	0.973684	0.0220909	3.065	0.973684	0.0223768
			0.693	0.666667	-0.0489506	5.498	0.99	-0.000891918	3.206	0.99	-0.00304802
			0.76	0.684211	-0.0315924
			0.87	0.701754	0.00139122
			0.895	0.719298	-0.00573517
			1.055	0.736842	0.0352621
			1.073	0.754386	0.0235052
			1.216	0.77193	0.04701
			1.231	0.789474	0.0333057
			1.24	0.807018	0.0180263
			1.326	0.824561	0.020714
			1.415	0.842105	0.0216475
			1.451	0.859649	0.0109352
			1.552	0.877193	0.0107837
			1.576	0.894737	-0.0029835
			1.592	0.912281	-0.0180806
			1.662	0.929825	-0.0255538
			1.67	0.947368	-0.0420096
			1.888	0.964912	-0.0342219
			2.713	0.982456	-0.00377755
			3.207	0.99	-0.0105257

## Sheet: Fig3D
	55 nt bridge construct			70 nt bridge contruct
Ftot, pN	Bond lifetime, s			Bond lifetime, s
	mean	SEM	N	mean	SEM	N
4	0.3523	0.072	26	0.3914	0.0921	33
6	0.7256	0.0886	57	0.8028	0.163	27
8	0.9085	0.1815	38	0.8414	0.2305	20
10	0.6339	0.1164	38	0.2197	0.0954	22
12	0.1689	0.0315	29	0.0822	0.0301	11

## Sheet: Fig3F
	55 nt bridge construct			70 nt bridge contruct
Ftot, pN	Δx, nm			Δx, nm
	mean	SD	N	mean	SD	N
4	3.77669	1.08905	26	7.35701	3.48946	33
6	4.53018	1.63667	57	7.65292	3.01833	27
8	4.28662	1.39275	38	8.45185	2.8849	20
10	5.74271	2.02785	38	10.9459	6.87448	22
12	5.05132	1.24585	29	11.5289	5.38822	11

## Sheet: Fig3G
FLoad, pN	mean, s	SEM, s	N
1.36	0.352308	0.071986	18
1.88	0.391364	0.0920932	33
2.64	0.725579	0.0885812	31
3.39	0.802778	0.16301	26
3.99	0.908526	0.181494	23
5	0.8414	0.230512	17
5.425	0.633921	0.116409	27
6.7	0.219682	0.0953528	21
6.93	0.168862	0.0315464	23
8.46	0.0821818	0.0301182	10

## Sheet: Fig3 S1
Lifetime, s	Cumulative density	Residuals Single Exponential	Residuals Double Exponential
0.013	0.0175439	0.000298351	-0.197309
0.048	0.0350877	0.0292248	-0.0475348
0.076	0.0526316	0.047269	0.010289
0.078	0.0701754	0.0322148	-0.00293961
0.1	0.0877193	0.0416061	0.0210418
0.106	0.105263	0.0312669	0.0133526
0.121	0.122807	0.0314749	0.0185214
0.125	0.140351	0.0186029	0.00665391
0.126	0.157895	0.00222299	-0.00949221
0.13	0.175439	-0.0106812	-0.0215249
0.193	0.192982	0.0415587	0.0366635
0.204	0.210526	0.0355871	0.0309849
0.21	0.22807	0.0242815	0.0197993
0.216	0.245614	0.0129243	0.00853966
0.24	0.263158	0.0196192	0.0154632
0.256	0.280702	0.0177928	0.0136962
0.27	0.298246	0.0137188	0.00963904
0.271	0.315789	-0.00287287	-0.00695234
0.283	0.333333	-0.00909283	-0.0131757
0.291	0.350877	-0.0191913	-0.0232821
0.291	0.368421	-0.0367352	-0.040826
0.36	0.385965	0.00662613	0.00239631
0.418	0.403509	0.0359629	0.0316187
0.428	0.421053	0.0261281	0.0217676
0.443	0.438596	0.0199495	0.0155668
0.454	0.45614	0.0105914	0.00619392
0.482	0.473684	0.01333	0.008901
0.498	0.491228	0.00702779	0.00258466
0.528	0.508772	0.00990234	0.00543978
0.576	0.526316	0.0233137	0.0188381
0.58	0.54386	0.0082578	0.00378198
0.605	0.561404	0.00595506	0.00148128
0.618	0.578947	-0.00386952	-0.00834024
0.637	0.596491	-0.0103784	-0.0148423
0.647	0.614035	-0.02223	-0.0266893
0.666	0.631579	-0.0291733	-0.0336218
0.685	0.649123	-0.0363919	-0.0408272
0.693	0.666667	-0.0496689	-0.054098
0.76	0.684211	-0.0332743	-0.0376364
0.87	0.701754	-0.00149542	-0.00570072
0.895	0.719298	-0.00883932	-0.0130025
1.055	0.736842	0.0311624	0.0273082
1.073	0.754386	0.0193301	0.0155139
1.216	0.77193	0.0424404	0.0389382
1.231	0.789474	0.0287129	0.0252444
1.24	0.807018	0.0134211	0.00997289
1.326	0.824561	0.0160383	0.012785
1.415	0.842105	0.0169786	0.0139264
1.451	0.859649	0.00628789	0.00331633
1.552	0.877193	0.00624331	0.003494
1.576	0.894737	-0.00749001	-0.0101875
1.592	0.912281	-0.022563	-0.0252262
1.662	0.929825	-0.0299178	-0.0324338
1.67	0.947368	-0.0463589	-0.0488583
1.888	0.964912	-0.0381069	-0.0401803
2.713	0.982456	-0.00580632	-0.00674178
3.207	1	-0.0117809	-0.0123364

## Sheet: Fig3 S5
Rsa4-SNAP	55 nt bridge construct
Ftot, pN	DeltaX		Bond lifetime, s
	mean	SD	mean	SEM	N
4	3.61746	1.23941	0.287476	0.0574579	21
6	4.24814	1.41183	0.619062	0.136928	16
8	3.87853	1.36361	1.04981	0.277207	16
10	4.25628	1.55468	0.557	0.151393	19
12	3.82392	1.87383	0.178263	0.050513	19

## Sheet: Fig3 S6
Rsa4-SNAP with MIDAS-WT, 55 nt bridge construct
Ftot = 4 pN			Ftot = 6 pN			Ftot = 8 pN			Ftot = 10 pN			F tot = 12 pN
Lifetime, s	Cumulative density	Residuals	Lifetime, s	Cumulative density	Residuals	Lifetime, s	Cumulative density	Residuals	Lifetime, s	Cumulative density	Residuals	Lifetime, s	Cumulative density	Residuals
0.043	0.047619	0.0651728	0.04	0.0625	0.0286665	0.018	0.0625	0.104791	0.026	0.0526316	0.0504439	0.011	0.0526316	0.0746517
0.05	0.0952381	0.0408631	0.089	0.125	0.0378674	0.044	0.125	0.0611569	0.063	0.105263	0.0640454	0.013	0.105263	0.0333367
0.051	0.142857	-0.00347642	0.125	0.1875	0.0244152	0.06	0.1875	0.0100534	0.068	0.157895	0.0199808	0.017	0.157895	0.0029
0.055	0.190476	-0.0381014	0.154	0.25	-0.000672078	0.08	0.25	-0.0384252	0.08	0.210526	-0.0124487	0.021	0.210526	-0.0281086
0.057	0.238095	-0.0792971	0.18	0.3125	-0.0311421	0.135	0.3125	-0.0636167	0.095	0.263158	-0.0405243	0.039	0.263158	0.00987254
0.077	0.285714	-0.0653004	0.286	0.375	0.0234032	0.266	0.375	-0.0442107	0.133	0.315789	-0.0342604	0.056	0.315789	0.0335789
0.122	0.333333	0.009716	0.289	0.4375	-0.0360776	0.396	0.4375	-0.0342619	0.16	0.368421	-0.047777	0.061	0.368421	0.00183463
0.146	0.380952	0.0194093	0.32	0.5	-0.068252	0.593	0.5	-0.00164083	0.204	0.421053	-0.0411762	0.067	0.421053	-0.0266154
0.17	0.428571	0.0241027	0.397	0.5625	-0.0619092	0.63	0.5625	-0.0480455	0.256	0.473684	-0.0304282	0.075	0.473684	-0.0484431
0.215	0.47619	0.0625826	0.526	0.625	-0.0272508	0.751	0.625	-0.0614286	0.415	0.526316	0.0732915	0.085	0.526316	-0.064764
0.24	0.52381	0.0567991	0.854	0.6875	0.0804445	1.37	0.6875	0.0595873	0.439	0.578947	0.0400959	0.088	0.578947	-0.106956
0.251	0.571429	0.0263644	0.989	0.75	0.0649615	1.994	0.75	0.10408	0.45	0.631579	-0.00394566	0.135	0.631579	-0.0201182
0.286	0.619048	0.0288764	1.271	0.8125	0.0721913	2.048	0.8125	0.0483626	0.463	0.684211	-0.0466748	0.187	0.684211	0.0390587
0.303	0.666667	0.00330163	1.28	0.875	0.0114187	2.099	0.875	-0.00802149	0.54	0.736842	-0.045823	0.259	0.736842	0.0901776
0.319	0.714286	-0.0248323	1.37	0.9375	-0.0351683	2.906	0.9375	-0.00281546	0.862	0.789474	0.0520403	0.298	0.789474	0.0764156
0.324	0.761905	-0.0666014	1.735	0.99	-0.052954	3.407	0.99	-0.0419993	0.946	0.842105	0.0247407	0.305	0.842105	0.0297726
0.391	0.809524	-0.0456785							1.196	0.894737	0.0259683	0.337	0.894737	0.00128779
0.514	0.857143	-0.00506199							1.523	0.947368	0.0123782	0.404	0.947368	-0.0145175
0.529	0.904762	-0.0444783							2.664	0.99	-0.00377924	0.929	0.99	-0.00218321
0.939	0.952381	0.0182421
0.955	0.99	-0.0276425
