# Supplementary material for: The MIDAS domain of AAA mechanoenzyme Mdn1 forms catch bonds with two different substrates
Source: eLife. 2022 Feb 11;11:e73534. doi: 10.7554/eLife.73534 (PMC8837202; doi:10.7554/eLife.73534)
Supplement: Figure 4—source data 1. [file elife-73534-fig4-data1.xlsx]

## Sheet: Fig4B
Elution volume (mL)	Ytm1-GFP alone	Ytm1-GFP plus MIDAS WT	Ytm1-GFP plus MIDAS Y4666R
	Normalized F528
6.56	2.84067e-05	2.84067e-05	9.12076e-05
6.81	2.84067e-05	2.84067e-05	4.56038e-05
7.06	2.84067e-05	0.00017044	0.000182415
7.31	2.84067e-05	5.68133e-05	4.56038e-05
7.56	2.84067e-05	5.68133e-05	6.84057e-05
7.81	5.68133e-05	5.68133e-05	4.56038e-05
8.06	2.84067e-05	0.000113627	0.000136811
8.31	2.84067e-05	0.000142033	0.000273623
8.56	2.84067e-05	0.0004261	0.000524444
8.81	8.522e-05	0.00124989	0.0012085
9.06	0.000113627	0.00142033	0.00150493
9.31	0.000142033	0.00144874	0.00127691
9.56	8.522e-05	0.0017044	0.000912076
9.81	0.00017044	0.0012783	0.000798066
10.06	0.00017044	0.00142033	0.000661255
10.31	0.000198847	0.00150555	0.000729661
10.56	0.000227253	0.00164759	0.000798066
10.81	0.000142033	0.00167599	0.000592849
11.06	0.000227253	0.00184643	0.000592849
11.31	0.000198847	0.00275545	0.000570047
11.56	0.000397693	0.004261	0.000729661
11.81	0.00051132	0.00982871	0.000820868
12.06	0.000994233	0.0296282	0.00175575
12.31	0.00176121	0.0984291	0.0024626
12.56	0.00252819	0.267875	0.00412714
12.81	0.00329517	0.590603	0.00679497
13.06	0.00687441	0.884101	0.01888
13.31	0.0353095	0.924069	0.102837
13.56	0.242877	0.84845	0.552057
13.81	0.77144	0.703349	1
14.06	1	0.522598	0.970517
14.31	0.994603	0.378746	0.80192
14.56	0.786013	0.294435	0.554383
14.81	0.522768	0.220237	0.399717
15.06	0.37636	0.161265	0.269746
15.31	0.249098	0.111638	0.187295
15.56	0.189899	0.0819532	0.109746
15.81	0.115615	0.0531773	0.0708227
16.06	0.0745107	0.0380365	0.0467895
16.31	0.0474391	0.0244297	0.0280235
16.56	0.0278669	0.0153112	0.0167594
16.81	0.0177258	0.0110786	0.0121534
17.06	0.0107661	0.00786865	0.00784385
17.31	0.00428941	0.00573815	0.00549526
17.56	0.00482913	0.00457347	0.00399033
17.81	0.00338039	0.00303951	0.00280463
18.06	0.00235775	0.00267023	0.00202937
18.31	0.00198847	0.00230094	0.00184695
18.56	0.00147715	0.00193165	0.00161893
18.81	0.00139193	0.00167599	0.0012541
19.06	0.00110786	0.00147715	0.00114009
19.31	0.00093742	0.0012783	0.00387632
19.56	0.000994233	0.0012783	0.00114009

## Sheet: Fig4D
	MIDAS-WT		MIDAS-Y4666R
	|ΔFNorm|		|ΔFNorm|
[MIDAS], uM	mean	SD	mean	SD
0.0195312	0.434361	0.348457	0.0568764	0.425058
0.0390625	0.624157	0.25029	0.117556	0.888841
0.078125	0.313344	0.64848	0.398765	0.205097
0.15625	0.919643	0.729476	0.0320109	1.01959
0.3125	0.868688	0.628675	0.530499	0.775254
0.625	0.987862	0.317669	0.0812862	0.5251
1.25	1.21257	0.447263	0.102248	1.33966
2.5	1.53331	0.359015	0.968574	1.02388
5	4.04107	2.85509	1.43524	0.982172
10	6.67543	3.84859	2.49144	2.20547
20	15.6095	7.02911	4.41035	4.02689
40	22.3905	6.25575	10.7807	7.89501

## Sheet: Fig4E
	55 nt bridge construct			70 nt bridge contruct
Ftot, pN	Δx, nm			Δx, nm
	mean	SD	N	mean	SD	N
4	4.16817	1.36266	22	5.47095	2.65436	16
6	4.37401	2.24691	17	9.16281	4.15023	21
8	4.54574	1.19153	14	9.40746	4.11414	8
10	3.72945	1.9171	11	10.0901	3.27353	10
12	4.97663	2.42998	8	10.6566	2.67746	8

## Sheet: Fig 4F
FLoad, pN	mean, s	SEM, s	N
1.36	0.210091	0.0413146	22
1.88	0.605875	0.157979	16
2.64	0.940882	0.260063	17
3.39	1.15833	0.288792	21
3.99	0.9765	0.362413	14
5	0.477	0.210347	8
5.425	0.439182	0.160263	11
6.7	0.0798	0.0353182	10
6.93	0.158625	0.0400638	8
8.46	0.03925	0.00973717	8

## Sheet: Fig4 S1C
Rsa4-GFP		Ytm1-GFP
Bin edge kDa	Counts	Bin edge, kDa	Counts
0	0	0	0
5	0	5	0
10	0	10	0
15	0	15	0
20	0	20	0
25	0	25	0
30	1	30	1
35	0	35	2
40	9	40	2
45	10	45	10
50	12	50	15
55	16	55	41
60	30	60	83
65	78	65	183
70	149	70	302
75	186	75	395
80	273	80	394
85	246	85	293
90	203	90	165
95	147	95	65
100	64	100	26
105	28	105	10
110	16	110	14
115	9	115	6
120	5	120	2
125	3	125	3
130	5	130	2
135	3	135	7
140	3	140	1
145	2	145	2
150	2	150	0
155	3	155	4
160	5	160	0
165	1	165	0
170	1	170	0
175	0	175	0
180	0	180	0
185	0	185	0
190	0	190	0
195	0	195	0
200	0	200	1
205	0	205	1
210	0	210	0
215	0	215	0
220	0	220	0
225	0	225	0
230	0	230	0
235	0	235	0
240	0	240	1
245	0	245	0
250	0	250	0

## Sheet: Fig4 S3
Protein	Rsa4-GFP		Ytm1-GFP		None
Bridge	55 nt	70 nt	55 nt	70 nt	55 nt	70 nt
# Active	38	28	30	24	0	0
#Total Molecules	91	67	78	86	13	22
Fraction	0.42	0.42	0.38	0.28	0	0
Error	0.08	0.1	0.08	0.06	0	0

## Sheet: Fig4 S4S5
Ytm1-GFP, 55 nt bridge construct																Ytm1-GFP, 70 nt bridge construct
Ftot = 4 pN			Ftot = 6 pN			Ftot = 8 pN			Ftot = 10 pN			F tot = 12 pN				Ftot = 4 pN			Ftot = 6 pN			Ftot = 8 pN			Ftot = 10 pN			Ftot = 12 pN
Lifetime, s	Cumulative density	Residuals	Lifetime, s	Cumulative density	Residuals	Lifetime, s	Cumulative density	Residuals	Lifetime, s	Cumulative density	Residuals	Lifetime, s	Cumulative density	Residuals		Lifetime, s	Cumulative density	Residuals	Lifetime, s	Cumulative density	Residuals	Lifetime, s	Cumulative density	Residuals	Lifetime, s	Cumulative density	Residuals	Lifetime, s	Cumulative density	Residuals
0.032	0.0454545	0.127378	0.025	0.0588235	0.0900561	0.065	0.0714286	0.112947	0.024	0.0909091	0.14327	0.027	0.125	-0.0121131		0.037	0.0625	0.0570149	0.021	0.047619	0.110299	0.014	0.125	0.123239	0.014	0.1	0.274048	0.02	0.125	0.00394429
0.041	0.0909091	0.118457	0.037	0.117647	0.0422494	0.115	0.142857	0.0950854	0.036	0.181818	0.0747536	0.044	0.25	-0.0370653		0.055	0.125	0.0212458	0.039	0.0952381	0.0753434	0.025	0.25	0.0168348	0.015	0.2	0.181993	0.022	0.25	0.0566104
0.044	0.136364	0.0848179	0.051	0.176471	-0.00390125	0.14	0.214286	0.0491063	0.052	0.272727	0.0126859	0.105	0.375	0.112686		0.114	0.1875	0.0408041	0.077	0.142857	0.0538369	0.049	0.375	-0.0691745	0.015	0.3	0.0819927	0.022	0.375	-0.0683896
0.049	0.181818	0.0586651	0.076	0.235294	-0.0405683	0.147	0.285714	-0.0153499	0.062	0.363636	-0.0607683	0.112	0.5	0.0123168		0.139	0.25	0.0106499	0.098	0.190476	0.0202941	0.101	0.5	-0.116661	0.016	0.5	-0.110163	0.025	0.5	0.007536
0.053	0.227273	0.0283069	0.246	0.294118	0.0363272	0.155	0.357143	-0.0788909	0.085	0.454545	-0.113132	0.135	0.625	-0.0397896		0.144	0.3125	-0.0455454	0.155	0.238095	0.00965117	0.397	0.625	0.0607052	0.017	0.6	-0.202419	0.028	0.625	0.0252388
0.054	0.272727	-0.0134206	0.277	0.352941	-0.00033633	0.192	0.428571	-0.114934	0.127	0.545455	-0.139069	0.227	0.75	0.0329359		0.149	0.375	-0.101795	0.161	0.285714	-0.0341779	0.453	0.75	-0.0266685	0.021	0.7	-0.272412	0.03	0.75	-0.0284217
0.059	0.318182	-0.0405183	0.307	0.411765	-0.0384132	0.289	0.5	-0.101615	0.383	0.636364	0.0484556	0.267	0.875	-0.0387985		0.238	0.4375	-0.0615361	0.185	0.333333	-0.0668269	1.207	0.875	0.0753017	0.13	0.8	0.0577544	0.081	0.875	0.124171
0.061	0.363636	-0.0787582	0.401	0.470588	-0.0364387	0.471	0.571429	-0.0412462	0.445	0.727273	0.00234919	0.352	0.99	-0.0900469		0.394	0.5	0.0222834	0.312	0.380952	-0.0400736	1.57	0.99	-0.0217459	0.234	0.9	0.0623204	0.086	0.99	-0.000468579
0.069	0.409091	-0.0960673	0.415	0.529412	-0.0867265	0.749	0.642857	0.0351139	0.832	0.818182	0.077986					0.498	0.5625	0.0377295	0.33	0.428571	-0.0777804				0.32	0.99	-0.0125611
0.08	0.454545	-0.104622	0.497	0.588235	-0.0980782	0.831	0.714286	-0.00236407	1.384	0.909091	0.0643947					0.658	0.625	0.0710543	0.392	0.47619	-0.0923843
0.095	0.5	-0.102931	0.971	0.647059	0.0481947	1.439	0.785714	0.0881729	1.401	0.99	-0.0254228					0.661	0.6875	0.0101121	0.429	0.52381	-0.121106
0.105	0.545455	-0.118871	1.174	0.705882	0.04965	1.56	0.857143	0.0358623								0.705	0.75	-0.030437	0.872	0.571429	0.017204
0.136	0.590909	-0.0817003	1.384	0.764706	0.040667	2.573	0.928571	0.0444114								0.91	0.8125	-0.00990023	1.176	0.619048	0.0624682
0.245	0.636364	0.0796477	1.9	0.823529	0.0653225	4.945	0.99	-0.00107656								1.278	0.875	0.0198973	1.396	0.666667	0.0686929
0.265	0.681818	0.0613165	2.01	0.882353	0.019011											1.31	0.9375	-0.0369972	1.42	0.714286	0.0263669
0.287	0.727273	0.0427153	2.285	0.941176	-0.0143526											2.404	0.99	-0.0152773	1.531	0.761905	0.00188411
0.371	0.772727	0.0763867	3.939	0.99	-0.0121474														1.9	0.809524	0.0173374
0.422	0.818182	0.0650081																	2.201	0.857143	0.00847265
0.506	0.863636	0.0597371																	3.367	0.904762	0.044881
0.536	0.909091	0.0249938																	3.834	0.952381	0.013631
0.555	0.954545	-0.0144652																	4.429	0.99	-0.0205966
0.557	0.99	-0.0593213
